# Supplementary material
Source: PubMed Central journal article supplement (PMC4201955)
Supplement: NIHMS625020-supplement-1.pdf [file NIHMS625020-supplement-1.pdf]

## Supplementary Figure 1

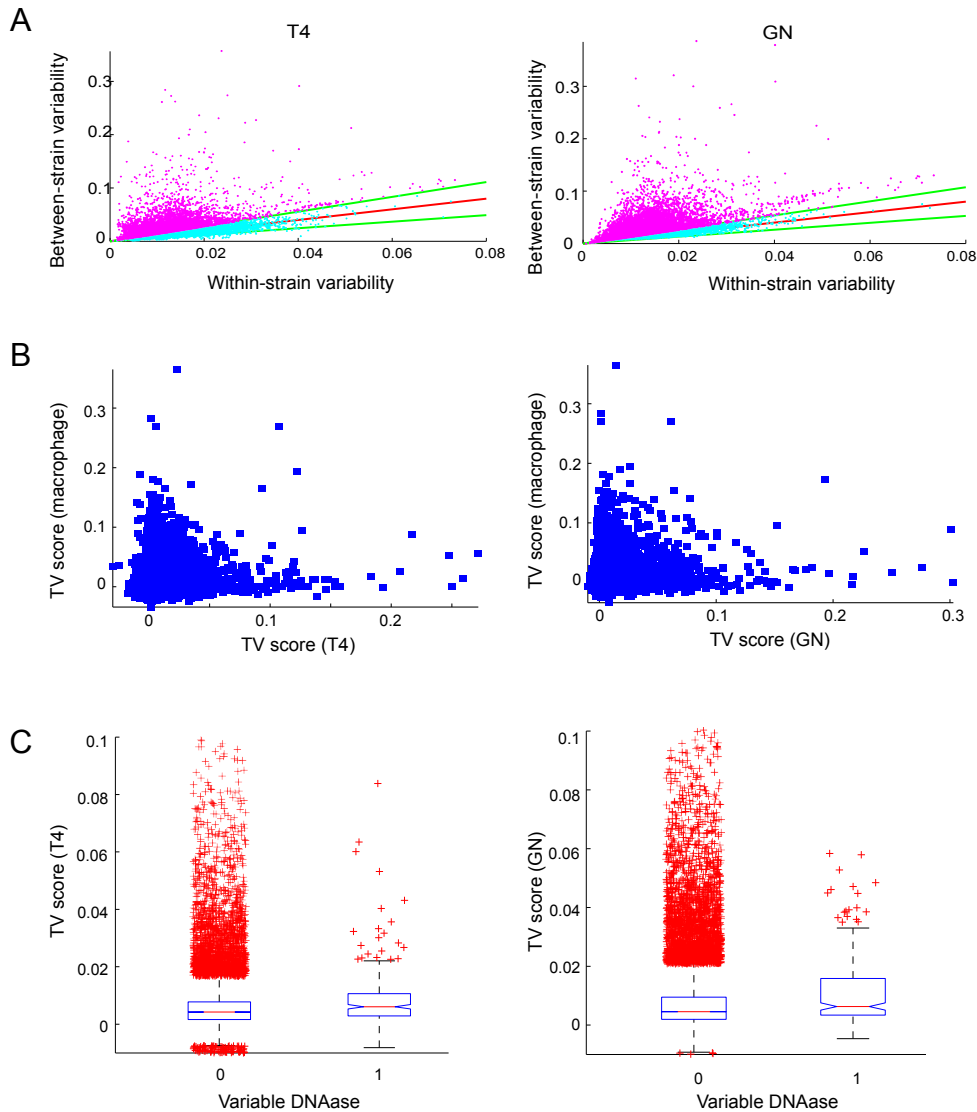

**Figure S1. The True variation (TV) metric. (A)** For each transcript, within strain-variability for each strain was computed as the absolute difference between replicates, averaged across all strains and divided by mean expression. Within-strain variability was computed as mean absolute deviation across the strains, and then divided by mean transcript expression. Each point represents a transcript. For identifying transcripts with high confidence TV scores, the distribution of negative TV scores (points below the red lines) was used to define a window around the line that corresponds to zero TV (defined by the green lines). The TV scores that lie in this window defined a “null” Gaussian distribution, which was used to compute the p-value for each TV score. **(B)** Scatter plot of TV scores computed from this study and a previous gene expression study in Macrophages (Orozco *et al.*, 2012) (Spearman correlation  $\rho=0.2$  and P-value  $< 1e-100$  for T4;  $\rho=0.26$  and P-value  $< 1e-200$  for GN). **(C)** Transcripts are grouped into those with (group=1) or without (group=0) nearby variable DNAase sites (Hosseini *et al.*, 2013). Boxplots show the median, 25% and 75% quantiles of TV scores for each group.

## Supplementary Figure 2

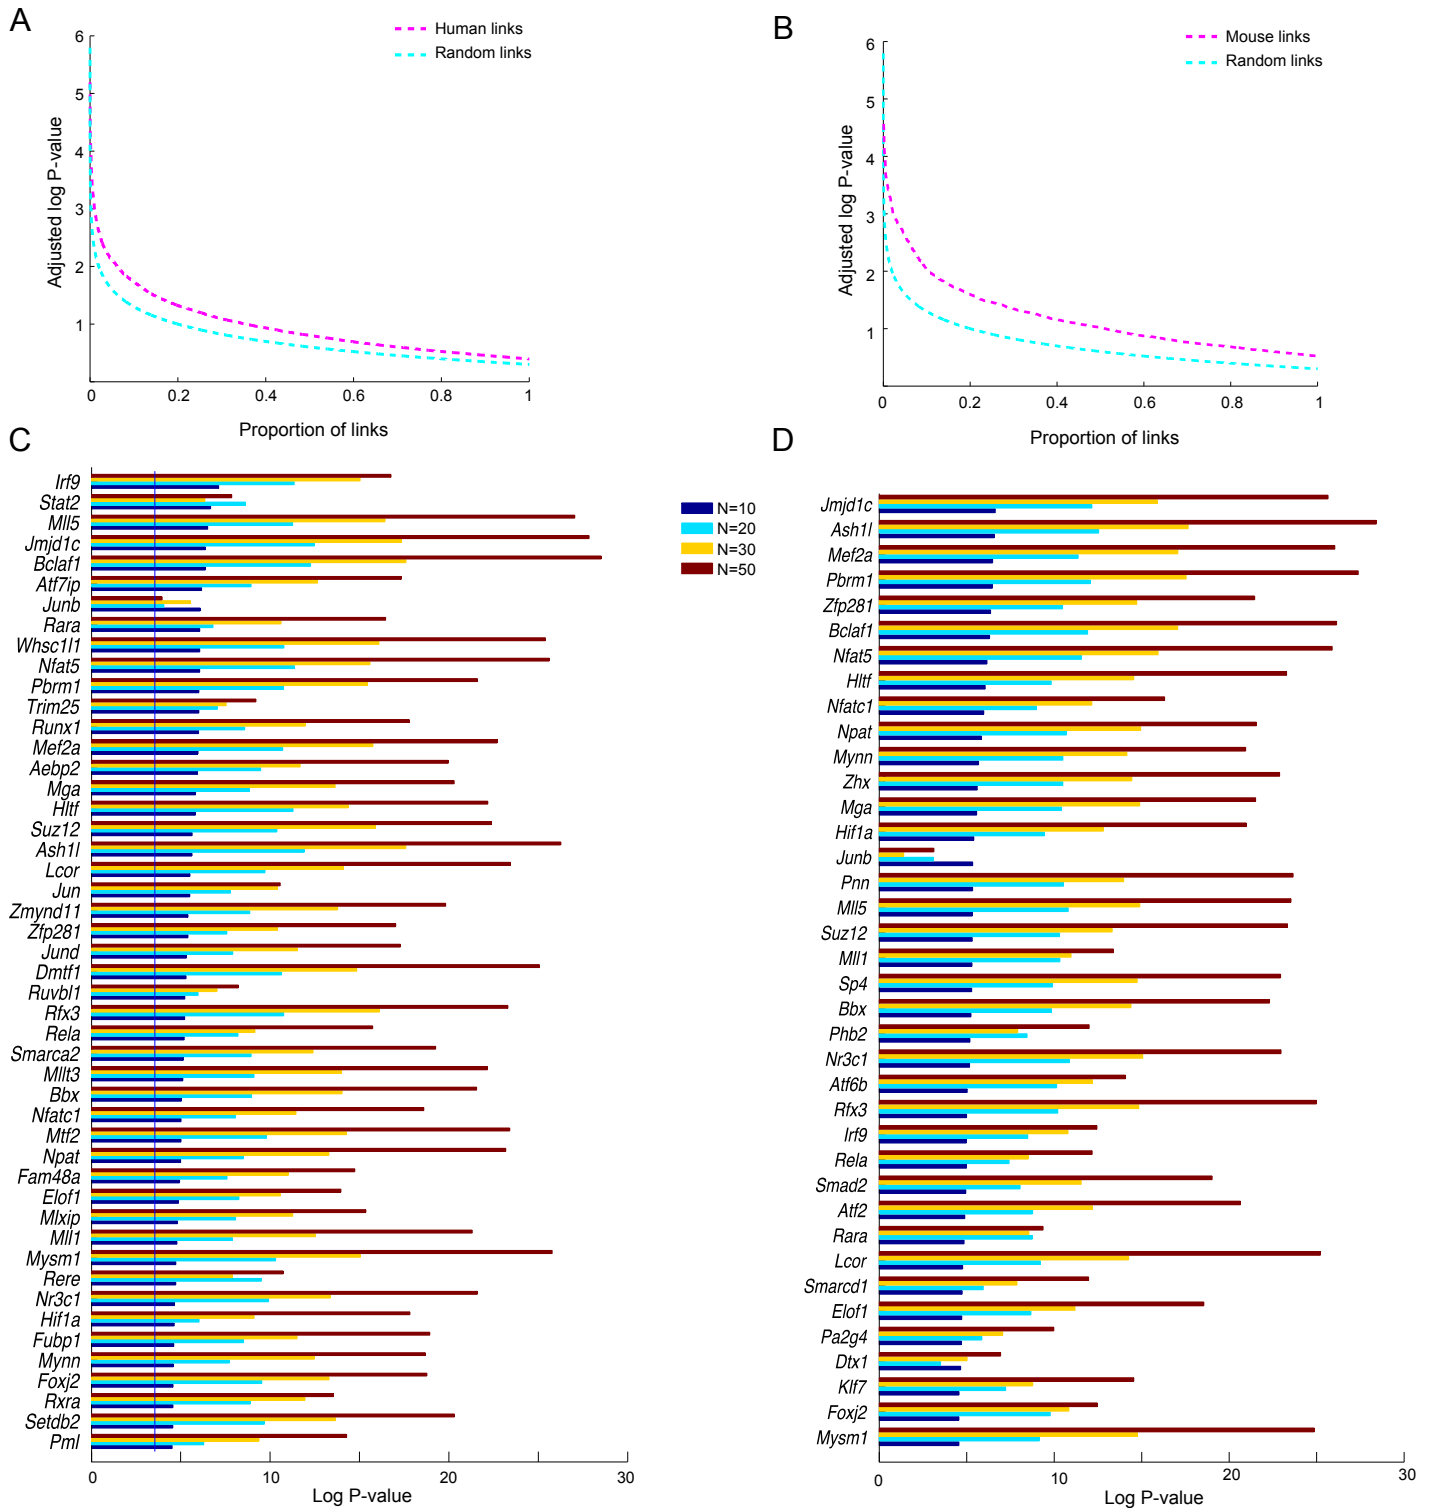

**Figure S2. Cross-species replication of inferred regulatory links. (A-B)** Inferred TF-target links from one species are assessed in the second species. Figure shows the CDF of log P-values for links identified in the “discovery” species as assessed in the “test” species. For sub-figure **(A)** links were identified in human and assessed in mouse. For sub-figure **(B)** links were identified in mouse and assessed in human. **(C-D)** For the top  $N=\{10, 20, 30, 50\}$  targets of each TF in mouse (human), we computed the enrichment for high co-expression values (correlation coefficient) with its top  $N$  target in human (mouse) using the Wilcoxon rank sum test, and considering as background the correlation coefficients for associations between that TF and all other genes. Figures show the TFs whose targets are significantly “replicable” across species (using a 5% FDR threshold).

**Table S1. Joint and cell-specific cis-eQTLs for 39 inbred mice using expression data from GN and T4 cells.**

| Probe ID | Gene Symbol   | SNP Chrom (mm37) | SNP Position (mm37) | Best cis-eQTL SNP | Gene-level P-value (permutation analysis) | Q-value | Type  |
|----------|---------------|------------------|---------------------|-------------------|-------------------------------------------|---------|-------|
| 10373944 | Zmat5         | 11               | 4638506             | rs29415458        | 4.0                                       | 2.1E-03 | joint |
| 10542750 | Med21         | 6                | 146715724           | rs30759086        | 4.0                                       | 2.1E-03 | joint |
| 10419288 | Gch1          | 14               | 48580546            | rs30713303        | 4.0                                       | 2.1E-03 | joint |
| 10521566 | Tmem128       | 5                | 38961342            | rs33252235        | 4.0                                       | 2.1E-03 | joint |
| 10565840 | Neu3          | 7                | 106961689           | rs3679473         | 4.0                                       | 2.1E-03 | joint |
| 10400109 | Zfp277        | 12               | 41887752            | rs33844949        | 4.0                                       | 2.1E-03 | joint |
| 10376899 | Trim16        | 11               | 62701947            | rs26940967        | 4.0                                       | 2.1E-03 | joint |
| 10512005 | 1810030N24Rik | 4                | 34948296            | rs27761123        | 4.0                                       | 2.1E-03 | joint |
| 10545401 | Vamp5         | 6                | 71832725            | rs6259011         | 4.0                                       | 2.1E-03 | joint |
| 10411882 | Nln           | 13               | 105183198           | rs29235759        | 4.0                                       | 2.1E-03 | joint |
| 10412701 | 3830406C13Rik | 14               | 12267571            | rs31142294        | 4.0                                       | 2.1E-03 | joint |
| 10578071 | Wrrn          | 8                | 34369548            | rs3655839         | 4.0                                       | 2.1E-03 | joint |
| 10443421 | Brpf3         | 17               | 29013324            | rs33719751        | 4.0                                       | 2.1E-03 | joint |
| 10439881 | 5330426P16Rik | 16               | 50274601            | rs4185610         | 4.0                                       | 2.1E-03 | joint |
| 10490370 | Psmg7         | 2                | 178975820           | rs27698946        | 4.0                                       | 2.1E-03 | joint |
| 10407387 | Gm7120        | 13               | 120070017           | rs29666531        | 4.0                                       | 2.1E-03 | joint |
| 10382692 | 2210020M01Rik | 11               | 115762341           | rs13481247        | 4.0                                       | 2.1E-03 | joint |
| 10441933 | 2210404J11Rik | 17               | 15446299            | rs33659635        | 4.0                                       | 2.1E-03 | joint |
| 10527732 | Fry           | 5                | 151003034           | rs29503742        | 4.0                                       | 2.1E-03 | joint |
| 10480379 | Mrps5         | 2                | 128166258           | rs27446019        | 4.0                                       | 2.1E-03 | joint |
| 10486595 | Ttbk2         | 2                | 119572730           | rs33016743        | 4.0                                       | 2.1E-03 | joint |
| 10572591 | Ocel1         | 8                | 73228613            | rs33447296        | 4.0                                       | 2.1E-03 | joint |
| 10543114 | Rpa3          | 6                | 8407487             | rs29916108        | 4.0                                       | 2.1E-03 | joint |
| 10579736 | 9130011J15Rik | 8                | 75112482            | rs6218496         | 4.0                                       | 2.1E-03 | joint |
| 10447038 | 1110001A16Rik | 17               | 78951702            | rs3670726         | 4.0                                       | 2.1E-03 | joint |
| 10484371 | Calcr1        | 2                | 84433170            | rs28044702        | 4.0                                       | 2.1E-03 | joint |
| 10439049 | Pigx          | 16               | 32090262            | rs4169922         | 4.0                                       | 2.1E-03 | joint |
| 10348432 | Agap1         | 1                | 90689439            | rs31441072        | 4.0                                       | 2.1E-03 | joint |
| 10407507 | Rpl35a        | 16               | 33064622            | rs4171166         | 4.0                                       | 2.1E-03 | joint |
| 10472820 | Itga6         | 2                | 71432969            | rs27985234        | 4.0                                       | 2.1E-03 | joint |
| 10396108 | Arf6          | 12               | 71269636            | rs29131427        | 4.0                                       | 2.1E-03 | joint |
| 10404928 | C78339        | 13               | 46570016            | rs29874743        | 4.0                                       | 2.1E-03 | joint |
| 10417869 | Anxa7         | 14               | 21052836            | rs30158307        | 4.0                                       | 2.1E-03 | joint |
| 10462539 | Nudt15        | 14               | 73861463            | rs30404670        | 4.0                                       | 2.1E-03 | joint |
| 10590365 | Vipr1         | 9                | 121560327           | rs33680295        | 4.0                                       | 2.1E-03 | joint |
| 10544570 | Pcnp          | 16               | 55919183            | rs4188086         | 4.0                                       | 2.1E-03 | joint |
| 10491136 | Tnik          | 3                | 28081299            | rs29644297        | 4.0                                       | 2.1E-03 | joint |
| 10441178 | Itgb2l        | 16               | 97388863            | rs4221351         | 4.0                                       | 2.1E-03 | joint |
| 10357808 | Snrpe         | 1                | 135409223           | rs32494351        | 4.0                                       | 2.1E-03 | joint |
| 10579313 | Ssbp4         | 8                | 72270336            | rs33223746        | 4.0                                       | 2.1E-03 | joint |
| 10542460 | Dera          | 6                | 137667376           | rs30224085        | 4.0                                       | 2.1E-03 | joint |
| 10523766 | Lrrc8c        | 5                | 106106983           | rs6178162         | 4.0                                       | 2.1E-03 | joint |
| 10427015 | Acvr1b        | 15               | 100902918           | rs6349436         | 4.0                                       | 2.1E-03 | joint |
| 10396699 | Fntb          | 12               | 77911811            | rs29176473        | 4.0                                       | 2.1E-03 | joint |
| 10557470 | Gdpd3         | 7                | 133254825           | rs31738440        | 4.0                                       | 2.1E-03 | joint |
| 10355246 | Acadl         | 1                | 67123786            | rs31844088        | 4.0                                       | 2.1E-03 | joint |
| 10575685 | Nudt7         | 8                | 116236688           | rs13479995        | 4.0                                       | 2.1E-03 | joint |
| 10479627 | Tpd52l2       | 2                | 181207445           | rs27671712        | 4.0                                       | 2.1E-03 | joint |
| 10441497 | Tulp4         | 17               | 6114911             | rs33599254        | 4.0                                       | 2.1E-03 | joint |
| 10504094 | Galt          | 4                | 41694501            | rs6405084         | 4.0                                       | 2.1E-03 | joint |
| 10374453 | Glul          | 1                | 155590349           | rs32454728        | 4.0                                       | 2.1E-03 | joint |

| Probe ID | Gene Symbol   | SNP Chrom (mm37) | SNP Position (mm37) | Best cis-eQTL SNP | Gene-level P-value (permutation analysis) | Q-value | Type  |
|----------|---------------|------------------|---------------------|-------------------|-------------------------------------------|---------|-------|
| 10477815 | Phf20         | 2                | 156176910           | rs27336917        | 4.0                                       | 2.1E-03 | joint |
| 10479550 | Pdpf          | 2                | 181303721           | rs27654429        | 4.0                                       | 2.1E-03 | joint |
| 10450723 | H2-T10        | 17               | 36497056            | mm37-17-36497056  | 4.0                                       | 2.1E-03 | joint |
| 10594636 | Ppp1r2        | 16               | 31207323            | rs4168855         | 4.0                                       | 2.1E-03 | joint |
| 10444821 | H2-Q8         | 17               | 35649680            | mm37-17-35649680  | 4.0                                       | 2.1E-03 | joint |
| 10564909 | Man2a2        | 7                | 87376087            | rs32350778        | 4.0                                       | 2.1E-03 | joint |
| 10475830 | Mrps5         | 2                | 128166258           | rs27446019        | 4.0                                       | 2.1E-03 | joint |
| 10530612 | Fryl          | 5                | 73654644            | rs6364064         | 4.0                                       | 2.1E-03 | joint |
| 10420787 | Mtmr9         | 14               | 64848723            | rs31448986        | 4.0                                       | 2.1E-03 | joint |
| 10407120 | Rps3a         | 3                | 85019408            | rs30804792        | 4.0                                       | 2.1E-03 | joint |
| 10359181 | Tor3a         | 1                | 158217747           | rs4136042         | 4.0                                       | 2.1E-03 | joint |
| 10508115 | Stk40         | 4                | 125762193           | rs27550222        | 4.0                                       | 2.1E-03 | joint |
| 10359386 | Dars2         | 1                | 162766845           | rs6175813         | 4.0                                       | 2.1E-03 | joint |
| 10532187 | Gak           | 5                | 109077217           | rs6310635         | 4.0                                       | 2.1E-03 | joint |
| 10512709 | Mcart1        | 4                | 45382906            | rs27862174        | 4.0                                       | 2.1E-03 | joint |
| 10365769 | Hal           | 10               | 92626660            | rs29373088        | 4.0                                       | 2.1E-03 | joint |
| 10450682 | H2-T23        | 17               | 37073380            | mm37-17-37073380  | 4.0                                       | 2.1E-03 | joint |
| 10565862 | Pold3         | 7                | 106534630           | rs31200487        | 4.0                                       | 2.1E-03 | joint |
| 10360884 | Iars2         | 1                | 187103826           | rs32415281        | 4.0                                       | 2.1E-03 | joint |
| 10462091 | Klf9          | 19               | 22990922            | rs30644836        | 4.0                                       | 2.1E-03 | joint |
| 10356475 | Arl4c         | 1                | 90516874            | rs30290928        | 4.0                                       | 2.1E-03 | joint |
| 10398721 | 2810002N01Rik | 12               | 113604286           | rs29156659        | 4.0                                       | 2.1E-03 | joint |
| 10412760 | Il3ra         | 14               | 15375448            | rs31072851        | 4.0                                       | 2.1E-03 | joint |
| 10489065 | Ndrp3         | 2                | 156825245           | rs33395615        | 4.0                                       | 2.1E-03 | joint |
| 10450694 | H2-T22        | 17               | 37073380            | mm37-17-37073380  | 4.0                                       | 2.1E-03 | joint |
| 10455007 | Zmat2         | 18               | 36719667            | rs29561436        | 4.0                                       | 2.1E-03 | joint |
| 10520833 | Mrpl33        | 5                | 31585096            | rs33153872        | 4.0                                       | 2.1E-03 | joint |
| 10520288 | Galnt11       | 5                | 24509818            | rs33486334        | 4.0                                       | 2.1E-03 | joint |
| 10475211 | Haus2         | 2                | 119978910           | rs27423349        | 4.0                                       | 2.1E-03 | joint |
| 10549171 | 5730419I09Rik | 6                | 143094081           | rs6368858         | 4.0                                       | 2.1E-03 | joint |
| 10373902 | Gatsl3        | 11               | 3686755             | rs26897275        | 4.0                                       | 2.1E-03 | joint |
| 10572449 | Lsm4          | 8                | 73228613            | rs33447296        | 4.0                                       | 2.1E-03 | joint |
| 10426999 | Acvrl1        | 15               | 100943615           | rs3673167         | 4.0                                       | 2.1E-03 | joint |
| 10427849 | 6030458C11Rik | 15               | 12750495            | rs31634346        | 4.0                                       | 2.1E-03 | joint |
| 10444824 | H2-Q6         | 17               | 35306154            | mm37-17-35306154  | 4.0                                       | 2.1E-03 | joint |
| 10549341 | 4933424B01Rik | 6                | 146359925           | rs30741186        | 4.0                                       | 2.1E-03 | joint |
| 10408331 | Acot13        | 13               | 25677099            | rs6265976         | 4.0                                       | 2.1E-03 | joint |
| 10386470 | 4930412M03Rik | 11               | 60545490            | rs29402619        | 4.0                                       | 2.1E-03 | joint |
| 10417538 | Pdhh          | 14               | 9569951             | rs31436768        | 4.0                                       | 2.1E-03 | joint |
| 10407072 | Elovl7        | 13               | 109177164           | rs29884548        | 4.0                                       | 2.1E-03 | joint |
| 10452980 | Eif2ak2       | 17               | 78951702            | rs3670726         | 4.0                                       | 2.1E-03 | joint |
| 10485963 | Arhgap11a     | 2                | 114159060           | rs27455022        | 4.0                                       | 2.1E-03 | joint |
| 10516605 | Hdac1         | 4                | 129202096           | rs31878418        | 4.0                                       | 2.1E-03 | joint |
| 10348299 | 5830472F04Rik | 1                | 89469616            | rs32481323        | 4.0                                       | 2.1E-03 | joint |
| 10366712 | Ppm1h         | 10               | 121721932           | rs29342476        | 4.0                                       | 2.1E-03 | joint |
| 10413125 | Samd8         | 14               | 22411229            | rs30456693        | 4.0                                       | 2.1E-03 | joint |
| 10540072 | Ppp1r2        | 16               | 31207323            | rs4168855         | 4.0                                       | 2.1E-03 | joint |
| 10375031 | Snrnp25       | 11               | 32119734            | rs29419622        | 4.0                                       | 2.1E-03 | joint |
| 10352815 | Irf6          | 1                | 195302377           | rs32792037        | 4.0                                       | 2.1E-03 | joint |
| 10467871 | Dnmbp         | 19               | 43943259            | rs30522915        | 4.0                                       | 2.1E-03 | joint |

| Probe ID | Gene Symbol   | SNP Chrom (mm37) | SNP Position (mm37) | Best cis-eQTL SNP | Gene-level P-value (permutation analysis) | Q-value | Type  |
|----------|---------------|------------------|---------------------|-------------------|-------------------------------------------|---------|-------|
| 10524034 | Idua          | 5                | 109824615           | rs29624173        | 4.0                                       | 2.1E-03 | joint |
| 10457489 | 6030446N20Rik | 18               | 12310824            | rs30068698        | 4.0                                       | 2.1E-03 | joint |
| 10567412 | Eri2          | 7                | 127003960           | rs31824682        | 4.0                                       | 2.1E-03 | joint |
| 10567297 | Itpril2       | 7                | 125934386           | rs6404036         | 4.0                                       | 2.1E-03 | joint |
| 10560592 | Clptm1        | 7                | 19723345            | rs31180331        | 4.0                                       | 2.1E-03 | joint |
| 10476163 | Ptpra         | 2                | 130367115           | rs13459166        | 4.0                                       | 2.1E-03 | joint |
| 10516211 | Ndufs5        | 4                | 123115527           | rs27553626        | 4.0                                       | 2.1E-03 | joint |
| 10418702 | Sh3bp5        | 14               | 32161714            | rs30675496        | 4.0                                       | 2.1E-03 | joint |
| 10451261 | Abcc10        | 17               | 46678560            | rs33699221        | 4.0                                       | 2.1E-03 | joint |
| 10408074 | Hist1h4b      | 13               | 23495851            | rs6314855         | 4.0                                       | 2.1E-03 | joint |
| 10430649 | Cbx7          | 15               | 79769540            | rs32338468        | 4.0                                       | 2.1E-03 | joint |
| 10518428 | Clcn6         | 4                | 147224626           | rs32194305        | 4.0                                       | 2.1E-03 | joint |
| 10402066 | Foxn3         | 12               | 100827319           | rs29203245        | 4.0                                       | 2.1E-03 | joint |
| 10528527 | Fam126a       | 5                | 22620136            | rs33156476        | 4.0                                       | 2.1E-03 | joint |
| 10566488 | Trim3         | 7                | 112779528           | rs31445876        | 4.0                                       | 2.1E-03 | joint |
| 10579181 | Rfxank        | 8                | 72270336            | rs33223746        | 4.0                                       | 2.1E-03 | joint |
| 10449356 | Al413582      | 17               | 27626166            | rs33172754        | 4.0                                       | 2.1E-03 | joint |
| 10506031 | Nfia          | 4                | 97428004            | rs28110080        | 4.0                                       | 2.1E-03 | joint |
| 10412562 | Flnb          | 14               | 9018991             | rs6291209         | 4.0                                       | 2.1E-03 | joint |
| 10573578 | BC056474      | 8                | 87590219            | rs13479871        | 4.0                                       | 2.1E-03 | joint |
| 10444830 | H2-Q7         | 17               | 35374902            | mm37-17-35374902  | 4.0                                       | 2.1E-03 | joint |
| 10481845 | Fam125b       | 2                | 33737110            | rs33026548        | 4.0                                       | 2.1E-03 | joint |
| 10472846 | Pdk1          | 2                | 71602801            | rs33268912        | 4.0                                       | 2.1E-03 | joint |
| 10377380 | 1500010J02Rik | 11               | 69028313            | rs3708219         | 4.0                                       | 2.1E-03 | joint |
| 10401138 | Atp6v1d       | 12               | 80028884            | rs6303798         | 4.0                                       | 2.1E-03 | joint |
| 10350733 | Rgs16         | 1                | 155590349           | rs32454728        | 4.0                                       | 2.1E-03 | joint |
| 10404496 | Nqo2          | 13               | 34158199            | rs29588682        | 4.0                                       | 2.1E-03 | joint |
| 10412345 | Parp8         | 13               | 117064385           | rs29511167        | 4.0                                       | 2.1E-03 | joint |
| 10408709 | Ssr1          | 13               | 38142773            | rs30018482        | 4.0                                       | 2.1E-03 | joint |
| 10500412 | Gpr89         | 3                | 96711291            | rs30609666        | 4.0                                       | 2.1E-03 | joint |
| 10564631 | Slco3a1       | 7                | 81864105            | rs31276257        | 4.0                                       | 2.1E-03 | joint |
| 10447004 | Hdac1         | 4                | 129202096           | rs31878418        | 4.0                                       | 2.1E-03 | joint |
| 10376721 | Smc8          | 11               | 60567566            | rs13481050        | 4.0                                       | 2.1E-03 | joint |
| 10372988 | Slc16a7       | 10               | 124421491           | rs29362468        | 4.0                                       | 2.1E-03 | joint |
| 10597883 | Ano10         | 9                | 122148100           | rs30428866        | 4.0                                       | 2.1E-03 | joint |
| 10472195 | Nudt15        | 14               | 73902085            | rs30595135        | 4.0                                       | 2.1E-03 | joint |
| 10563094 | Fcgrt         | 7                | 51942509            | rs50417507        | 4.0                                       | 2.1E-03 | joint |
| 10507529 | Med8          | 4                | 118078625           | rs27495547        | 4.0                                       | 2.1E-03 | joint |
| 10566161 | Trim68        | 7                | 110061966           | rs32467515        | 4.0                                       | 2.1E-03 | joint |
| 10508468 | 2510006D16Rik | 4                | 129405334           | rs32527750        | 4.0                                       | 2.1E-03 | joint |
| 10545009 | Pigy          | 6                | 57659921            | rs30902330        | 4.0                                       | 2.1E-03 | joint |
| 10399036 | Uevld         | 7                | 53452815            | rs6157797         | 4.0                                       | 2.1E-03 | joint |
| 10440953 | Donson        | 16               | 92081867            | rs6285649         | 4.0                                       | 2.1E-03 | joint |
| 10366825 | Agap2         | 10               | 126505512           | rs29332499        | 4.0                                       | 2.1E-03 | joint |
| 10354470 | Rpl15         | 14               | 18129273            | rs30107859        | 4.0                                       | 2.1E-03 | joint |
| 10487380 | Gm10766       | 2                | 127252844           | rs27449840        | 4.0                                       | 2.1E-03 | joint |
| 10373728 | Patz1         | 11               | 3686755             | rs26897275        | 4.0                                       | 2.1E-03 | joint |
| 10444114 | Vps52         | 17               | 33940053            | mm37-17-33940053  | 4.0                                       | 2.1E-03 | joint |
| 10483809 | Nfe2l2        | 2                | 75518588            | rs27978430        | 4.0                                       | 2.1E-03 | joint |
| 10458033 | Stard4        | 18               | 33400755            | rs30210002        | 4.0                                       | 2.1E-03 | joint |
| 10480699 | Dpp7          | 2                | 25077171            | rs29620450        | 4.0                                       | 2.1E-03 | joint |
| 10476728 | Dtd1          | 2                | 144392969           | rs33423270        | 4.0                                       | 2.1E-03 | joint |
| 10589413 | Nme6          | 9                | 109728187           | rs29928493        | 4.0                                       | 2.1E-03 | joint |

| Probe ID | Gene Symbol   | SNP Chrom (mm37) | SNP Position (mm37) | Best cis-eQTL SNP | Gene-level P-value (permutation analysis) | Q-value | Type  |
|----------|---------------|------------------|---------------------|-------------------|-------------------------------------------|---------|-------|
| 10418720 | Mettl6        | 14               | 32399644            | rs30837452        | 4.0                                       | 2.1E-03 | joint |
| 10473965 | Arhgap1       | 2                | 91690031            | rs29518200        | 4.0                                       | 2.1E-03 | joint |
| 10568169 | Qprt          | 7                | 134217351           | rs31543602        | 4.0                                       | 2.1E-03 | joint |
| 10439701 | Abhd10        | 16               | 45411640            | rs4181076         | 4.0                                       | 2.1E-03 | joint |
| 10407291 | Arl15         | 13               | 114607122           | rs30044459        | 4.0                                       | 2.1E-03 | joint |
| 10550833 | Zfp180        | 7                | 25119077            | rs32341931        | 4.0                                       | 2.1E-03 | joint |
| 10487359 | Itprip1       | 2                | 126900158           | rs6284112         | 4.0                                       | 2.1E-03 | joint |
| 10377953 | Kif1c         | 11               | 70469788            | rs29431005        | 4.0                                       | 2.1E-03 | joint |
| 10492590 | Ppm1l         | 3                | 69151930            | rs30999878        | 4.0                                       | 2.1E-03 | joint |
| 10429926 | Dgat1         | 15               | 76343291            | rs31952352        | 4.0                                       | 2.1E-03 | joint |
| 10522467 | Rasl11b       | 5                | 74200587            | rs33081586        | 4.0                                       | 2.1E-03 | joint |
| 10354832 | Ppil3         | 1                | 58465892            | rs32150647        | 4.0                                       | 2.1E-03 | joint |
| 10437080 | Ttc3          | 16               | 94603265            | rs3721009         | 4.0                                       | 2.1E-03 | joint |
| 10590137 | Acaa1a        | 9                | 119278549           | rs33655475        | 4.0                                       | 2.1E-03 | joint |
| 10408162 | Zfp322a       | 13               | 23445323            | rs6243245         | 4.0                                       | 2.1E-03 | joint |
| 10397763 | 9030617O03Rik | 12               | 102069254           | rs29223317        | 4.0                                       | 2.1E-03 | joint |
| 10514896 | 2210012G02Rik | 4                | 106543639           | rs31903240        | 4.0                                       | 2.1E-03 | joint |
| 10542836 | Klhdc5        | 6                | 147337897           | rs30362969        | 4.0                                       | 2.1E-03 | joint |
| 10359754 | Mpzl1         | 1                | 166987356           | rs31420643        | 4.0                                       | 2.1E-03 | joint |
| 10539042 | Polr1a        | 6                | 71251145            | rs30964011        | 4.0                                       | 2.1E-03 | joint |
| 10361799 | Adat2         | 10               | 13247820            | rs29319120        | 4.0                                       | 2.1E-03 | joint |
| 10491952 | Mgst2         | 3                | 51006281            | rs30158371        | 4.0                                       | 2.1E-03 | joint |
| 10377851 | Psemb6        | 11               | 70471151            | rs26924498        | 4.0                                       | 2.1E-03 | joint |
| 10462035 | Ldhd          | 6                | 142368838           | rs6329892         | 4.0                                       | 2.1E-03 | joint |
| 10390258 | Snx11         | 11               | 96767902            | rs29387885        | 4.0                                       | 2.1E-03 | joint |
| 10529741 | Rab28         | 5                | 41932526            | rs33525655        | 4.0                                       | 2.1E-03 | joint |
| 10441646 | Sft2d1        | 17               | 8485314             | rs33080376        | 4.0                                       | 2.1E-03 | joint |
| 10488415 | Cst3          | 2                | 148693899           | rs33373524        | 4.0                                       | 2.1E-03 | joint |
| 10573747 | Adcy7         | 8                | 91102075            | rs32734138        | 4.0                                       | 2.1E-03 | joint |
| 10562439 | Gpatch1       | 7                | 35726106            | rs32290010        | 4.0                                       | 2.1E-03 | joint |
| 10488944 | Uqcc          | 2                | 155324286           | rs27338907        | 4.0                                       | 2.1E-03 | joint |
| 10536527 | Capza2        | 6                | 17630608            | rs30068139        | 4.0                                       | 2.1E-03 | joint |
| 10376427 | 2810021J22Rik | 11               | 58681822            | rs26971932        | 4.0                                       | 2.1E-03 | joint |
| 10417167 | Clybl         | 14               | 122600010           | rs30827652        | 4.0                                       | 2.1E-03 | joint |
| 10483381 | Stk39         | 2                | 68155505            | rs27972836        | 4.0                                       | 2.1E-03 | joint |
| 10565018 | Iqgap1        | 7                | 87507588            | rs32347321        | 4.0                                       | 2.1E-03 | joint |
| 10385966 | Anxa6         | 11               | 55379765            | rs26948271        | 4.0                                       | 2.1E-03 | joint |
| 10578582 | D030016E14Rik | 8                | 48527677            | rs32595293        | 4.0                                       | 2.1E-03 | joint |
| 10466402 | Eif4a1        | 11               | 68786528            | rs29433934        | 4.0                                       | 2.1E-03 | joint |
| 10550169 | Phf20         | 2                | 155159440           | rs6325215         | 4.0                                       | 2.1E-03 | joint |
| 10371506 | Stab2         | 10               | 86050898            | rs29326301        | 4.0                                       | 2.1E-03 | joint |
| 10560695 | Ceacam16      | 7                | 19623601            | rs32365669        | 4.0                                       | 2.1E-03 | joint |
| 10553015 | Bcat2         | 7                | 52879613            | rs31194008        | 4.0                                       | 2.1E-03 | joint |
| 10401891 | Ston2         | 12               | 93285469            | rs3687366         | 4.0                                       | 2.1E-03 | joint |
| 10577144 | Dcun1d2       | 8                | 13605017            | rs6281754         | 4.0                                       | 2.1E-03 | joint |
| 10366350 | Krr1          | 10               | 111250959           | rs29375297        | 4.0                                       | 2.1E-03 | joint |
| 10542745 | Fgfr1op2      | 6                | 146505005           | rs30516598        | 4.0                                       | 2.1E-03 | joint |
| 10531952 | Abcg3         | 5                | 105379107           | rs33535604        | 4.0                                       | 2.1E-03 | joint |
| 10498576 | Lxn           | 3                | 67242128            | rs30900164        | 4.0                                       | 2.1E-03 | joint |
| 10412385 | Mrps30        | 13               | 119074495           | rs30030678        | 4.0                                       | 2.1E-03 | joint |
| 10441556 | Gm1604b       | 17               | 7916760             | rs33886934        | 4.0                                       | 2.1E-03 | joint |
| 10388227 | Cyb5d2        | 11               | 72411477            | rs26900597        | 4.0                                       | 2.1E-03 | joint |
| 10376796 | Grap          | 11               | 61413334            | rs3700615         | 4.0                                       | 2.1E-03 | joint |
| 10552622 | 2410002F23Rik | 7                | 51330113            | rs31469843        | 4.0                                       | 2.1E-03 | joint |
| 10553788 | Atp10a        | 7                | 65384180            | rs6274680         | 4.0                                       | 2.1E-03 | joint |

| Probe ID | Gene Symbol | SNP Chrom (mm37) | SNP Position (mm37) | Best cis-eQTL SNP | Gene-level P-value (permutation analysis) | Q-value | Type  |
|----------|-------------|------------------|---------------------|-------------------|-------------------------------------------|---------|-------|
| 10524621 | Oasl2       | 5                | 115392734           | rs32143931        | 4.0                                       | 2.1E-03 | joint |
| 10533285 | Ptpn11      | 5                | 121658762           | rs29505322        | 4.0                                       | 2.1E-03 | joint |
| 10591472 | Cdc37       | 9                | 20724667            | rs6306775         | 4.0                                       | 2.1E-03 | joint |
| 10545339 | Mrpl35      | 6                | 71350429            | rs30213915        | 4.0                                       | 2.1E-03 | joint |
| 10575102 | Cirh1a      | 8                | 109164175           | rs33180684        | 4.0                                       | 2.1E-03 | joint |
| 10475199 | Snap23      | 2                | 119895277           | rs27441680        | 4.0                                       | 2.1E-03 | joint |
| 10413059 | Vcl         | 14               | 21732168            | rs30797328        | 4.0                                       | 2.1E-03 | joint |
| 10442240 | Zfp760      | 17               | 21606159            | rs32491074        | 4.0                                       | 2.1E-03 | joint |
| 10540493 | Edem1       | 6                | 108301923           | rs29922131        | 4.0                                       | 2.1E-03 | joint |
| 10561842 | Capns1      | 7                | 30911363            | rs47397692        | 4.0                                       | 2.1E-03 | joint |
| 10545897 | Dusp11      | 6                | 85980627            | rs30653381        | 4.0                                       | 2.1E-03 | joint |
| 10579468 | Haus8       | 8                | 72984250            | rs33569542        | 4.0                                       | 2.1E-03 | joint |
| 10505451 | Orm2        | 4                | 62920029            | rs27905464        | 4.0                                       | 2.1E-03 | joint |
| 10550098 | Wdr12       | 1                | 59779226            | rs6336931         | 4.0                                       | 2.1E-03 | joint |
| 10508351 | Phc2        | 4                | 128421457           | rs27558242        | 4.0                                       | 2.1E-03 | joint |
| 10456158 | Gm9949      | 18               | 62417011            | rs29731574        | 4.0                                       | 2.1E-03 | joint |
| 10404053 | Hist1h2bc   | 13               | 23495851            | rs6314855         | 4.0                                       | 2.1E-03 | joint |
| 10367673 | Plekhg1     | 10               | 6618400             | mm37-10-6618400   | 4.0                                       | 2.1E-03 | joint |
| 10550674 | Ercc2       | 7                | 19717530            | rs31936053        | 4.0                                       | 2.1E-03 | joint |
| 10387372 | Kdm6b       | 11               | 68786528            | rs29433934        | 4.0                                       | 2.1E-03 | joint |
| 10441642 | Brp44l      | 17               | 8510381             | rs3694756         | 4.0                                       | 2.1E-03 | joint |
| 10392936 | Nt5c        | 11               | 115369945           | rs27031432        | 4.0                                       | 2.1E-03 | joint |
| 10576439 | Cog2        | 8                | 126598718           | rs3688669         | 4.0                                       | 2.1E-03 | joint |
| 10407481 | Pfcp        | 13               | 6614495             | rs6235987         | 4.0                                       | 2.1E-03 | joint |
| 10449644 | Glo1        | 17               | 29917069            | rs3693494         | 4.0                                       | 2.1E-03 | joint |
| 10385382 | Sft2d1      | 17               | 8485314             | rs33080376        | 4.0                                       | 2.1E-03 | joint |
| 10549097 | Ldhb        | 6                | 142368838           | rs6329892         | 4.0                                       | 2.1E-03 | joint |
| 10529671 | Slc2a9      | 5                | 38842151            | rs29778357        | 4.0                                       | 2.1E-03 | joint |
| 10527213 | Daglb       | 5                | 144256790           | rs33549671        | 4.0                                       | 2.1E-03 | joint |
| 10575619 | Terf2ip     | 8                | 114025565           | rs31309593        | 4.0                                       | 2.1E-03 | joint |
| 10552812 | Irf3        | 7                | 52250686            | rs32051036        | 4.0                                       | 2.1E-03 | joint |
| 10503917 | Akirin2     | 4                | 34317853            | rs27803858        | 4.0                                       | 2.1E-03 | joint |
| 10509777 | Iffo2       | 4                | 138882720           | rs31859712        | 4.0                                       | 2.1E-03 | joint |
| 10509858 | Sdhb        | 4                | 140858826           | rs32662580        | 4.0                                       | 2.1E-03 | joint |
| 10565582 | Rps8        | 4                | 116499355           | rs27513773        | 4.0                                       | 2.1E-03 | joint |
| 10485117 | Creb3l1     | 2                | 91697689            | rs27384575        | 4.0                                       | 2.1E-03 | joint |
| 10404913 | Cap2        | 13               | 46641676            | rs4136112         | 4.0                                       | 2.1E-03 | joint |
| 10378059 | Txndc17     | 11               | 71854915            | rs29412896        | 4.0                                       | 2.1E-03 | joint |
| 10486522 | Zfp106      | 2                | 119895277           | rs27441680        | 4.0                                       | 2.1E-03 | joint |
| 10350853 | BC026585    | 1                | 159474767           | rs3723483         | 4.0                                       | 2.1E-03 | joint |
| 10439955 | Fam55c      | 16               | 55973781            | rs4188156         | 4.0                                       | 2.1E-03 | joint |
| 10552945 | Gys1        | 7                | 52238853            | rs32431972        | 4.0                                       | 2.1E-03 | joint |
| 10487969 | Trmt6       | 2                | 133015586           | rs28288156        | 4.0                                       | 2.1E-03 | joint |
| 10390283 | Cdk5rap3    | 11               | 96410911            | rs27074446        | 4.0                                       | 2.1E-03 | joint |
| 10435443 | Hspbp1      | 16               | 35800913            | rs4173147         | 4.0                                       | 2.1E-03 | joint |
| 10474972 | Chac1       | 2                | 119978910           | rs27423349        | 4.0                                       | 2.1E-03 | joint |
| 10441509 | Ppp1r2      | 16               | 31207323            | rs4168855         | 4.0                                       | 2.1E-03 | joint |
| 10517301 | Ldlrap1     | 4                | 134190126           | rs6327269         | 4.0                                       | 2.1E-03 | joint |
| 10386359 | Guk1        | 11               | 59023349            | rs29412340        | 4.0                                       | 2.1E-03 | joint |
| 10511175 | Aurkaip1    | 4                | 155224804           | rs6247365         | 4.0                                       | 2.1E-03 | joint |
| 10362073 | Sgk1        | 10               | 20605138            | rs29377930        | 4.0                                       | 2.1E-03 | joint |
| 10541114 | Rasgef1a    | 6                | 118431764           | rs6284156         | 4.0                                       | 2.1E-03 | joint |
| 10420785 | Mtmt9       | 14               | 64679008            | rs31056052        | 4.0                                       | 2.1E-03 | joint |
| 10508686 | Mecr        | 4                | 131411924           | rs27589731        | 4.0                                       | 2.1E-03 | joint |

| Probe ID | Gene Symbol   | SNP Chrom (mm37) | SNP Position (mm37) | Best cis-eQTL SNP | Gene-level P-value (permutation analysis) | Q-value | Type  |
|----------|---------------|------------------|---------------------|-------------------|-------------------------------------------|---------|-------|
| 10510422 | Casz1         | 4                | 148277980           | rs32695839        | 4.0                                       | 2.1E-03 | joint |
| 10377368 | Rpl26         | 11               | 68740711            | rs29456171        | 4.0                                       | 2.1E-03 | joint |
| 10412394 | Nnt           | 13               | 120234690           | rs29722117        | 4.0                                       | 2.1E-03 | joint |
| 10576152 | Trappc2l      | 8                | 125143871           | rs33245882        | 4.0                                       | 2.1E-03 | joint |
| 10471675 | Glo1          | 17               | 29917069            | rs3693494         | 4.0                                       | 2.1E-03 | joint |
| 10487208 | Atp8b4        | 2                | 125525113           | rs27435685        | 4.0                                       | 2.1E-03 | joint |
| 10408348 | Mrs2          | 13               | 25643363            | rs6412327         | 4.0                                       | 2.1E-03 | joint |
| 10572580 | Use1          | 8                | 73890792            | rs32668105        | 4.0                                       | 2.1E-03 | joint |
| 10407327 | Emb           | 13               | 118116312           | rs29571531        | 4.0                                       | 2.1E-03 | joint |
| 10560434 | Qpctl         | 7                | 19717530            | rs31936053        | 4.0                                       | 2.1E-03 | joint |
| 10465980 | Sdhaf2        | 19               | 10728651            | rs31091380        | 4.0                                       | 2.1E-03 | joint |
| 10385747 | Phf15         | 11               | 52464276            | rs26946582        | 4.0                                       | 2.1E-03 | joint |
| 10488722 | Commd7        | 2                | 153439162           | rs3720334         | 4.0                                       | 2.1E-03 | joint |
| 10544588 | Gimap3        | 6                | 48583618            | rs30123129        | 4.0                                       | 2.1E-03 | joint |
| 10439980 | Pcnp          | 16               | 55975926            | rs4151934         | 4.0                                       | 2.1E-03 | joint |
| 10477649 | Acsc2         | 2                | 154556635           | rs29956539        | 4.0                                       | 2.1E-03 | joint |
| 10395672 | Ap4s1         | 12               | 52771027            | rs29158863        | 4.0                                       | 2.1E-03 | joint |
| 10446804 | Slc30a6       | 17               | 75106216            | rs33516919        | 4.0                                       | 2.1E-03 | joint |
| 10477966 | Manbal        | 2                | 156968866           | rs33154095        | 4.0                                       | 2.1E-03 | joint |
| 10517383 | Nipal3        | 4                | 135048933           | rs32938063        | 4.0                                       | 2.1E-03 | joint |
| 10423363 | Ank           | 15               | 27437143            | rs13482494        | 4.0                                       | 2.1E-03 | joint |
| 10502050 | Alpk1         | 3                | 127216973           | rs30661860        | 4.0                                       | 2.1E-03 | joint |
| 10532999 | Sirt4         | 5                | 115563152           | rs33137118        | 4.0                                       | 2.1E-03 | joint |
| 10387559 | Senp3         | 11               | 68667674            | rs29385375        | 4.0                                       | 2.1E-03 | joint |
| 10357436 | Mcm6          | 1                | 130091676           | rs32140455        | 4.0                                       | 2.1E-03 | joint |
| 10467956 | Bloc1s2       | 19               | 44214333            | rs3725175         | 4.0                                       | 2.1E-03 | joint |
| 10517009 | Sytl1         | 4                | 132810523           | rs32051931        | 4.0                                       | 2.1E-03 | joint |
| 10461898 | Rfk           | 19               | 18123110            | rs30308813        | 4.0                                       | 2.1E-03 | joint |
| 10518228 | Vps13d        | 4                | 144667359           | rs27601587        | 4.0                                       | 2.1E-03 | joint |
| 10582501 | Fanca         | 8                | 125775590           | rs33018881        | 4.0                                       | 2.1E-03 | joint |
| 10564888 | Unc45a        | 7                | 87491970            | rs31040534        | 4.0                                       | 2.1E-03 | joint |
| 10573733 | Papd5         | 8                | 90914682            | rs32837750        | 4.0                                       | 2.1E-03 | joint |
| 10531437 | Scarb2        | 5                | 92902002            | rs31776682        | 4.0                                       | 2.1E-03 | joint |
| 10560260 | Sae1          | 7                | 17131895            | rs32333995        | 4.0                                       | 2.1E-03 | joint |
| 10533644 | Vps33a        | 5                | 123934329           | rs29724748        | 4.0                                       | 2.1E-03 | joint |
| 10555407 | Chchd8        | 7                | 107579311           | rs3682987         | 4.0                                       | 2.1E-03 | joint |
| 10488912 | Edem2         | 2                | 154635104           | rs29542436        | 4.0                                       | 2.1E-03 | joint |
| 10450675 | H2-T24        | 17               | 37091357            | mm37-17-37091357  | 4.0                                       | 2.1E-03 | joint |
| 10404067 | Hist1h4b      | 13               | 23495851            | rs6314855         | 4.0                                       | 2.1E-03 | joint |
| 10388154 | Med31         | 11               | 72565414            | rs26887864        | 4.0                                       | 2.1E-03 | joint |
| 10385325 | Pttg1         | 11               | 42800509            | rs29426145        | 4.0                                       | 2.1E-03 | joint |
| 10547088 | Mbd4          | 6                | 115802280           | rs30657994        | 4.0                                       | 2.1E-03 | joint |
| 10491599 | 4932438A13Rik | 3                | 37560742            | rs30085634        | 4.0                                       | 2.1E-03 | joint |
| 10447668 | Gm1604b       | 17               | 7916760             | rs33886934        | 4.0                                       | 2.1E-03 | joint |
| 10470741 | Coq4          | 2                | 29485035            | rs27201282        | 4.0                                       | 2.1E-03 | joint |
| 10385941 | Tnlp1         | 11               | 54764694            | rs29469382        | 4.0                                       | 2.1E-03 | joint |
| 10375903 | Cdkn2aipnl    | 11               | 52336494            | rs29436877        | 4.0                                       | 2.1E-03 | joint |
| 10472095 | Bloc1s2       | 19               | 44214333            | rs3725175         | 4.0                                       | 2.1E-03 | joint |
| 10394800 | Bnip3l        | 14               | 67951761            | rs30667567        | 4.0                                       | 2.1E-03 | joint |
| 10403455 | Dip2c         | 13               | 9252397             | rs29512540        | 4.0                                       | 2.1E-03 | joint |
| 10371959 | Elk3          | 10               | 92811139            | rs29365715        | 4.0                                       | 2.1E-03 | joint |
| 10450384 | Msh5          | 17               | 35475871            | mm37-17-35475871  | 4.0                                       | 2.1E-03 | joint |
| 10477644 | Trp53inp2     | 2                | 156163688           | rs27336985        | 4.0                                       | 2.1E-03 | joint |



| Probe ID | Gene Symbol   | SNP Chrom (mm37) | SNP Position (mm37) | Best cis-eQTL SNP | Gene-level P-value (permutation analysis) | Q-value | Type  |
|----------|---------------|------------------|---------------------|-------------------|-------------------------------------------|---------|-------|
| 10437928 | O610037P05Rik | 16               | 14290071            | rs4164042         | 4.0                                       | 2.1E-03 | joint |
| 10489107 | Samhd1        | 2                | 156968866           | rs33154095        | 4.0                                       | 2.1E-03 | joint |
| 10487660 | Fam113a       | 2                | 129658845           | rs27271340        | 4.0                                       | 2.1E-03 | joint |
| 10372844 | Rassf3        | 10               | 120836412           | rs29358003        | 4.0                                       | 2.1E-03 | joint |
| 10579347 | Ifi30         | 8                | 72296612            | rs33597694        | 4.0                                       | 2.1E-03 | joint |
| 10373740 | Pik3ip1       | 11               | 4172536             | rs29456423        | 4.0                                       | 2.1E-03 | joint |
| 10351026 | Gas5          | 1                | 162985158           | rs32696722        | 4.0                                       | 2.1E-03 | joint |
| 10494821 | Tspan2        | 3                | 102023581           | rs30911498        | 4.0                                       | 2.1E-03 | joint |
| 10446713 | Snord53       | 17               | 71941288            | rs33377370        | 4.0                                       | 2.1E-03 | joint |
| 10425333 | Apobec3       | 15               | 79423472            | rs32108677        | 4.0                                       | 2.1E-03 | joint |
| 10575074 | Tmco7         | 8                | 109223808           | rs33378496        | 4.0                                       | 2.1E-03 | joint |
| 10553403 | Htatif2       | 7                | 56581972            | rs6284895         | 4.0                                       | 2.1E-03 | joint |
| 10581835 | Wdr59         | 8                | 114249223           | rs6268367         | 4.0                                       | 2.1E-03 | joint |
| 10518385 | Mfn2          | 4                | 147372444           | rs33031209        | 4.0                                       | 2.1E-03 | joint |
| 10388065 | Nlrp1b        | 11               | 70911360            | rs3667647         | 4.0                                       | 2.1E-03 | joint |
| 10522060 | Fam114a1      | 5                | 65318137            | rs31442134        | 4.0                                       | 2.1E-03 | joint |
| 10459655 | Poli          | 18               | 69746739            | rs30006502        | 4.0                                       | 2.1E-03 | joint |
| 10412624 | Pxk           | 14               | 8943486             | rs30683468        | 4.0                                       | 2.1E-03 | joint |
| 10417708 | Oxsm          | 14               | 16270126            | rs30358912        | 4.0                                       | 2.1E-03 | joint |
| 10516590 | Zbtb8a        | 4                | 129847468           | rs8272673         | 4.0                                       | 2.1E-03 | joint |
| 10502191 | Ostc          | 3                | 130017760           | rs30746899        | 4.0                                       | 2.1E-03 | joint |
| 10498775 | Golim4        | 3                | 75720362            | rs3673084         | 4.0                                       | 2.1E-03 | joint |
| 10385995 | Ccdc69        | 11               | 54056312            | rs13496246        | 4.0                                       | 2.1E-03 | joint |
| 10345423 | Plekhb2       | 1                | 34867218            | rs13475803        | 4.0                                       | 2.1E-03 | joint |
| 10425999 | Ttc38         | 15               | 85694078            | rs3694980         | 4.0                                       | 2.1E-03 | joint |
| 10466676 | 1110059E24Rik | 19               | 21701479            | rs30753841        | 4.0                                       | 2.1E-03 | joint |
| 10582719 | Sipa1l2       | 8                | 128036046           | rs31995837        | 4.0                                       | 2.1E-03 | joint |
| 10547100 | Plxnd1        | 6                | 116398018           | rs29918692        | 4.0                                       | 2.1E-03 | joint |
| 10538617 | Lancl2        | 6                | 57659921            | rs30902330        | 4.0                                       | 2.1E-03 | joint |
| 10493335 | 5830417110Rik | 3                | 88439619            | rs6293667         | 4.0                                       | 2.1E-03 | joint |
| 10427428 | AW549877      | 15               | 3538844             | rs31887977        | 4.0                                       | 2.1E-03 | joint |
| 10474950 | Vps18         | 2                | 119067217           | rs33499009        | 4.0                                       | 2.1E-03 | joint |
| 10486172 | Fam82a2       | 2                | 119090181           | rs33033614        | 4.0                                       | 2.1E-03 | joint |
| 10389561 | Dhx40         | 11               | 86302643            | rs13481137        | 4.0                                       | 2.1E-03 | joint |
| 10358050 | Timm17a       | 1                | 137194760           | rs32368271        | 4.0                                       | 2.1E-03 | joint |
| 10458607 | Lars          | 18               | 42299973            | rs3690709         | 4.0                                       | 2.1E-03 | joint |
| 10517287 | Man1c1        | 4                | 134233017           | rs28261585        | 4.0                                       | 2.1E-03 | joint |
| 10359713 | Sft2d2        | 1                | 167155872           | rs32112379        | 4.0                                       | 2.1E-03 | joint |
| 10368224 | E030030I06Rik | 10               | 21801862            | rs6410365         | 4.0                                       | 2.1E-03 | joint |
| 10445360 | Supt3h        | 17               | 44824943            | rs33502191        | 4.0                                       | 2.1E-03 | joint |
| 10573583 | Man2b1        | 8                | 87434336            | rs32592383        | 4.0                                       | 2.1E-03 | joint |
| 10542140 | Klrb1f        | 6                | 129003173           | rs30175498        | 4.0                                       | 2.1E-03 | joint |
| 10386219 | Zfp39         | 11               | 58785140            | rs26971733        | 4.0                                       | 2.1E-03 | joint |
| 10389526 | Cltc          | 11               | 86597129            | rs29462930        | 4.0                                       | 2.1E-03 | joint |
| 10394778 | Hpcal1        | 12               | 17631362            | rs29158110        | 4.0                                       | 2.1E-03 | joint |
| 10410721 | Arsk          | 13               | 76015019            | rs3717315         | 4.0                                       | 2.1E-03 | joint |
| 10550906 | Plaur         | 7                | 25119077            | rs32341931        | 4.0                                       | 2.1E-03 | joint |
| 10425321 | Apobec3       | 15               | 79423472            | rs32108677        | 4.0                                       | 2.1E-03 | joint |
| 10539135 | Capg          | 6                | 71927695            | rs6334632         | 4.0                                       | 2.1E-03 | joint |
| 10562382 | Lsm14a        | 7                | 35177898            | rs32432896        | 4.0                                       | 2.1E-03 | joint |
| 10447569 | Serac1        | 17               | 6073632             | rs33278231        | 4.0                                       | 2.1E-03 | joint |
| 10381096 | Igfbp4        | 11               | 98913177            | rs13474434        | 4.0                                       | 2.1E-03 | joint |
| 10577070 | Tubgcp3       | 8                | 12433957            | rs6277651         | 4.0                                       | 2.1E-03 | joint |
| 10412830 | Ngly1         | 14               | 16270126            | rs30358912        | 4.0                                       | 2.1E-03 | joint |
| 10518019 | Ddi2          | 4                | 141176275           | rs32433574        | 4.0                                       | 2.1E-03 | joint |

| Probe ID | Gene Symbol   | SNP Chrom (mm37) | SNP Position (mm37) | Best cis-eQTL SNP | Gene-level P-value (permutation analysis) | Q-value | Type  |
|----------|---------------|------------------|---------------------|-------------------|-------------------------------------------|---------|-------|
| 10408243 | Hist1h4b      | 13               | 23495851            | rs63114855        | 4.0                                       | 2.1E-03 | joint |
| 10497399 | Pde7a         | 3                | 18777414            | rs30656335        | 4.0                                       | 2.1E-03 | joint |
| 10361031 | Rps6kc1       | 1                | 192727841           | rs31891268        | 4.0                                       | 2.1E-03 | joint |
| 10422436 | Dock9         | 14               | 122133056           | rs31454088        | 4.0                                       | 2.1E-03 | joint |
| 10546294 | Nup210        | 6                | 91045598            | rs30118107        | 4.0                                       | 2.1E-03 | joint |
| 10542677 | Etnk1         | 6                | 143094081           | rs6368858         | 4.0                                       | 2.1E-03 | joint |
| 10560414 | Ccdc61        | 7                | 18619279            | rs31342300        | 4.0                                       | 2.1E-03 | joint |
| 10428103 | Stk3          | 15               | 35170071            | rs32384032        | 4.0                                       | 2.1E-03 | joint |
| 10502196 | Rpl34         | 3                | 130074841           | rs31432535        | 4.0                                       | 2.1E-03 | joint |
| 10419073 | Tspan14       | 14               | 41788229            | rs30521185        | 4.0                                       | 2.1E-03 | joint |
| 10581940 | Kars          | 8                | 114582513           | rs32903835        | 4.0                                       | 2.1E-03 | joint |
| 10457038 | Gm10524       | 18               | 82902336            | rs29869356        | 4.0                                       | 2.1E-03 | joint |
| 10347980 | Iitm2c        | 1                | 87842073            | rs31340201        | 4.0                                       | 2.1E-03 | joint |
| 10523880 | Rpap2         | 5                | 108056144           | rs29731711        | 4.0                                       | 2.1E-03 | joint |
| 10590343 | Trak1         | 9                | 121096052           | rs30486572        | 4.0                                       | 2.1E-03 | joint |
| 10393544 | Cyth1         | 11               | 118279115           | rs29452076        | 4.0                                       | 2.1E-03 | joint |
| 10423921 | Oxr1          | 15               | 41898649            | rs3666046         | 4.0                                       | 2.1E-03 | joint |
| 10518372 | Miip          | 4                | 147238192           | rs27603697        | 4.0                                       | 2.1E-03 | joint |
| 10464251 | Atrnl1        | 19               | 57499562            | rs30752209        | 4.0                                       | 2.1E-03 | joint |
| 10512265 | 2310028H24Rik | 4                | 41518071            | rs32322824        | 4.0                                       | 2.1E-03 | joint |
| 10345504 | Cox5b         | 1                | 36744537            | rs31518923        | 4.0                                       | 2.1E-03 | joint |
| 10481474 | Crat          | 2                | 30238684            | rs27193651        | 4.0                                       | 2.1E-03 | joint |
| 10542636 | Pyroxd1       | 6                | 142368838           | rs6329892         | 4.0                                       | 2.1E-03 | joint |
| 10387545 | Eif4a1        | 11               | 68786528            | rs29433934        | 4.0                                       | 2.1E-03 | joint |
| 10582868 | Sp110         | 1                | 87878515            | rs3723583         | 4.0                                       | 2.1E-03 | joint |
| 10524723 | Gcn11         | 5                | 115460516           | rs33231931        | 4.0                                       | 2.1E-03 | joint |
| 10400023 | Tspan13       | 12               | 36287512            | rs29127252        | 4.0                                       | 2.1E-03 | joint |
| 10463462 | Sfxn3         | 19               | 45007357            | rs4137860         | 4.0                                       | 2.1E-03 | joint |
| 10511725 | Cyb5r4        | 9                | 86905574            | rs30179363        | 4.0                                       | 2.1E-03 | joint |
| 10348456 | Cops8         | 1                | 92575832            | rs32381743        | 4.0                                       | 2.1E-03 | joint |
| 10416334 | Dok2          | 14               | 71043013            | rs30346243        | 4.0                                       | 2.1E-03 | joint |
| 10572235 | Lpar2         | 8                | 72296612            | rs33597694        | 4.0                                       | 2.1E-03 | joint |
| 10555510 | Pde2a         | 7                | 108164967           | rs31037097        | 4.0                                       | 2.1E-03 | joint |
| 10400326 | Eapp          | 12               | 55695070            | rs29221983        | 4.0                                       | 2.1E-03 | joint |
| 10359190 | Fam20b        | 1                | 158315445           | rs32249484        | 4.0                                       | 2.1E-03 | joint |
| 10402648 | Brp44l        | 17               | 8510381             | rs3694756         | 4.0                                       | 2.1E-03 | joint |
| 10518226 | Vps13d        | 4                | 144667359           | rs27601587        | 4.0                                       | 2.1E-03 | joint |
| 10572432 | Isyna1        | 8                | 72356159            | rs33508509        | 4.0                                       | 2.1E-03 | joint |
| 10542650 | Golt1b        | 6                | 142368838           | rs6329892         | 4.0                                       | 2.1E-03 | joint |
| 10477052 | 2310046K01Rik | 2                | 151814275           | rs27346468        | 4.0                                       | 2.1E-03 | joint |
| 10412900 | Nkiras1       | 14               | 19804543            | rs31180136        | 4.0                                       | 2.1E-03 | joint |
| 10572637 | Fam125a       | 8                | 73890792            | rs32668105        | 4.0                                       | 2.1E-03 | joint |
| 10452978 | Gm6548        | 17               | 79274540            | rs33250776        | 4.0                                       | 2.1E-03 | joint |
| 10408044 | Cox5b         | 1                | 36744537            | rs31518923        | 4.0                                       | 2.1E-03 | joint |
| 10410355 | A530054K11Rik | 13               | 67680620            | rs29242717        | 4.0                                       | 2.1E-03 | joint |
| 10557571 | Al467606      | 7                | 134207826           | rs31060001        | 4.0                                       | 2.1E-03 | joint |
| 10594631 | Aph1b         | 9                | 66643110            | rs33676273        | 4.0                                       | 2.1E-03 | joint |
| 10389522 | Rpl13a        | 7                | 52174871            | rs3653613         | 4.0                                       | 2.1E-03 | joint |
| 10595109 | Lrrc1         | 9                | 77820103            | rs30038899        | 4.0                                       | 2.1E-03 | joint |
| 10348277 | Atg16l1       | 1                | 89473028            | rs31425983        | 4.0                                       | 2.1E-03 | joint |
| 10542691 | Lrmp          | 6                | 144898833           | rs30843330        | 4.0                                       | 2.1E-03 | joint |
| 10516695 | Tmem39b       | 4                | 129202096           | rs31878418        | 4.0                                       | 2.1E-03 | joint |
| 10490116 | Cass4         | 2                | 172199320           | rs33292738        | 4.0                                       | 2.1E-03 | joint |
| 10560856 | Irgc1         | 7                | 25119077            | rs32341931        | 4.0                                       | 2.1E-03 | joint |
| 10566585 | Gm1966        | 7                | 114170898           | rs31636440        | 4.0                                       | 2.1E-03 | joint |

| Probe ID | Gene Symbol   | SNP Chrom (mm37) | SNP Position (mm37) | Best cis-eQTL SNP | Gene-level P-value (permutation analysis) | Q-value | Type  |
|----------|---------------|------------------|---------------------|-------------------|-------------------------------------------|---------|-------|
| 10479514 | Col20a1       | 2                | 180640406           | rs27667839        | 4.0                                       | 2.1E-03 | joint |
| 10431601 | Arsa          | 15               | 89507077            | rs31625234        | 4.0                                       | 2.1E-03 | joint |
| 10404051 | Hist1h4d      | 13               | 23495851            | rs6314855         | 4.0                                       | 2.1E-03 | joint |
| 10485042 | Zfp408        | 2                | 91690031            | rs29518200        | 4.0                                       | 2.1E-03 | joint |
| 10503259 | Trp53inp1     | 4                | 11088328            | rs27747110        | 4.0                                       | 2.1E-03 | joint |
| 10421003 | Bnip3l        | 14               | 67951761            | rs30667567        | 4.0                                       | 2.1E-03 | joint |
| 10396306 | Jkamp         | 12               | 73178478            | rs29173056        | 4.0                                       | 2.1E-03 | joint |
| 10579070 | Zfp868        | 8                | 72186510            | rs33481582        | 4.0                                       | 2.1E-03 | joint |
| 10495596 | Frrs1         | 3                | 116798243           | rs6372496         | 4.0                                       | 2.1E-03 | joint |
| 10353783 | Ccdc115       | 1                | 34541351            | rs3682032         | 4.0                                       | 2.1E-03 | joint |
| 10511149 | Mrp120        | 4                | 155324980           | rs3659087         | 4.0                                       | 2.1E-03 | joint |
| 10405693 | Dapk1         | 13               | 60841065            | rs30057268        | 4.0                                       | 2.1E-03 | joint |
| 10348558 | Scly          | 1                | 93035701            | rs3708228         | 4.0                                       | 2.1E-03 | joint |
| 10423593 | Laptm4b       | 15               | 34936830            | rs32011871        | 4.0                                       | 2.1E-03 | joint |
| 10546349 | Xpc           | 6                | 91444913            | rs6230067         | 4.0                                       | 2.1E-03 | joint |
| 10567964 | Cln3          | 7                | 133254825           | rs31738440        | 4.0                                       | 2.1E-03 | joint |
| 10346780 | Eif4a1        | 11               | 68786528            | rs29433934        | 4.0                                       | 2.1E-03 | joint |
| 10447167 | Mta3          | 17               | 84078289            | rs33367830        | 3.7                                       | 3.7E-03 | joint |
| 10387251 | Z310047M10Rik | 11               | 69294200            | rs29391628        | 3.7                                       | 3.7E-03 | joint |
| 10404262 | Rps8          | 4                | 116499355           | rs27513773        | 3.7                                       | 3.7E-03 | joint |
| 10551626 | Lgals4        | 7                | 29645746            | rs32308271        | 3.7                                       | 3.7E-03 | joint |
| 10411454 | Sec61b        | 4                | 47855116            | rs6239869         | 3.7                                       | 3.7E-03 | joint |
| 10590325 | Cttnnb1       | 9                | 120980209           | rs30379801        | 3.7                                       | 3.7E-03 | joint |
| 10384780 | Fanc1         | 11               | 25726666            | rs26825351        | 3.7                                       | 3.7E-03 | joint |
| 10387689 | Kctd11        | 11               | 70309221            | rs29426113        | 3.7                                       | 3.7E-03 | joint |
| 10523778 | D830014E11Rik | 5                | 106106983           | rs6178162         | 3.7                                       | 3.7E-03 | joint |
| 10436788 | Hunk          | 16               | 90373659            | rs4217360         | 3.7                                       | 3.7E-03 | joint |
| 10350753 | Glul          | 1                | 155590349           | rs32454728        | 3.7                                       | 3.7E-03 | joint |
| 10599576 | Pdpdf         | 2                | 181222071           | rs27671682        | 3.7                                       | 3.7E-03 | joint |
| 10398727 | Klc1          | 12               | 112995775           | rs29221416        | 3.7                                       | 3.7E-03 | joint |
| 10556082 | Ppfibp2       | 7                | 114789328           | rs31487343        | 3.7                                       | 3.7E-03 | joint |
| 10408902 | Ccdc90a       | 13               | 43828565            | rs29238723        | 3.7                                       | 3.7E-03 | joint |
| 10581558 | Rps26         | 10               | 128411698           | rs6208640         | 3.7                                       | 3.7E-03 | joint |
| 10572613 | Mrp134        | 8                | 73890792            | rs32668105        | 3.7                                       | 3.7E-03 | joint |
| 10542665 | Cmas          | 6                | 143094081           | rs6368858         | 3.7                                       | 3.7E-03 | joint |
| 10424331 | Trmt12        | 15               | 58616665            | rs32180716        | 3.7                                       | 3.7E-03 | joint |
| 10458090 | Reep5         | 18               | 34401782            | rs29826401        | 3.7                                       | 3.7E-03 | joint |
| 10586368 | Clpx          | 9                | 65128314            | rs32878147        | 3.7                                       | 3.7E-03 | joint |
| 10581499 | Chtf8         | 8                | 109164175           | rs33180684        | 3.7                                       | 3.7E-03 | joint |
| 10446334 | Glcc1         | 6                | 8584503             | rs30759135        | 3.7                                       | 3.7E-03 | joint |
| 10396383 | Slc38a6       | 12               | 74108934            | rs33847664        | 3.7                                       | 3.7E-03 | joint |
| 10487109 | Cep152        | 2                | 126175992           | rs29956145        | 3.7                                       | 3.7E-03 | joint |
| 10396421 | Hif1a         | 12               | 74991059            | rs29202209        | 3.7                                       | 3.7E-03 | joint |
| 10349404 | Mgat5         | 1                | 129293175           | rs31595084        | 3.7                                       | 3.7E-03 | joint |
| 10347933 | Sp140         | 1                | 87878515            | rs3723583         | 3.7                                       | 3.7E-03 | joint |
| 10378572 | Tlcd2         | 11               | 74506401            | rs29396397        | 3.7                                       | 3.7E-03 | joint |
| 10584821 | Cd3d          | 9                | 44883262            | rs30360106        | 3.7                                       | 3.7E-03 | joint |
| 10576661 | Itgb1         | 8                | 131207151           | rs32965842        | 3.7                                       | 3.7E-03 | joint |
| 10474181 | Abtb2         | 2                | 103534892           | rs27393739        | 3.7                                       | 3.7E-03 | joint |
| 10540059 | Slc41a3       | 6                | 90568670            | rs30716113        | 3.7                                       | 3.7E-03 | joint |
| 10358982 | Mr1           | 1                | 156349974           | rs31193547        | 3.7                                       | 3.7E-03 | joint |
| 10461439 | Fads1         | 19               | 10263233            | rs30660123        | 3.7                                       | 3.7E-03 | joint |
| 10349648 | Ctse          | 1                | 133716572           | rs30622085        | 3.7                                       | 3.7E-03 | joint |
| 10441494 | Tulp4         | 17               | 6114911             | rs33599254        | 3.7                                       | 3.7E-03 | joint |
| 10509620 | Capzb         | 4                | 138261770           | rs27575260        | 3.7                                       | 3.7E-03 | joint |

| Probe ID | Gene Symbol   | SNP Chrom (mm37) | SNP Position (mm37) | Best cis-eQTL SNP | Gene-level P-value (permutation analysis) | Q-value | Type  |
|----------|---------------|------------------|---------------------|-------------------|-------------------------------------------|---------|-------|
| 10504551 | Rg9mtd3       | 4                | 45341933            | rs27862264        | 3.7                                       | 3.7E-03 | joint |
| 10449225 | Decr2         | 17               | 26440528            | rs29522863        | 3.7                                       | 3.7E-03 | joint |
| 10493267 | Arhgef2       | 3                | 88438299            | rs31223164        | 3.7                                       | 3.7E-03 | joint |
| 10535124 | Ints1         | 5                | 140250465           | rs32295005        | 3.7                                       | 3.7E-03 | joint |
| 10441864 | Mllt4         | 17               | 13820938            | rs33887083        | 3.7                                       | 3.7E-03 | joint |
| 10587627 | Cyb5r4        | 9                | 86943397            | rs30034441        | 3.7                                       | 3.7E-03 | joint |
| 10498998 | D930015E06Rik | 3                | 83718097            | rs30803680        | 3.7                                       | 3.7E-03 | joint |
| 10356293 | A630001G21Rik | 1                | 87819630            | rs31991710        | 3.7                                       | 3.7E-03 | joint |
| 10556820 | Tmem159       | 7                | 127065997           | rs31984932        | 3.7                                       | 3.7E-03 | joint |
| 10551760 | Zfp84         | 7                | 30787466            | rs31088110        | 3.7                                       | 3.7E-03 | joint |
| 10467688 | Exosc1        | 19               | 41961954            | rs31120253        | 3.7                                       | 3.7E-03 | joint |
| 10499839 | Snapin        | 3                | 89500015            | rs31437137        | 3.7                                       | 3.7E-03 | joint |
| 10573461 | Dnase2a       | 8                | 87434336            | rs32592383        | 3.5                                       | 5.1E-03 | joint |
| 10450103 | H2-Ke6        | 17               | 34312937            | mm37-17-34312937  | 3.5                                       | 5.1E-03 | joint |
| 10502205 | Hadh          | 3                | 131577261           | rs30754910        | 3.5                                       | 5.1E-03 | joint |
| 10425808 | Tspo          | 15               | 83476351            | rs31718701        | 3.5                                       | 5.1E-03 | joint |
| 10547985 | Cd27          | 6                | 125062474           | rs30900624        | 3.5                                       | 5.1E-03 | joint |
| 10515416 | Rps8          | 4                | 116499355           | rs27513773        | 3.5                                       | 5.1E-03 | joint |
| 10427807 | Sub1          | 15               | 12324856            | rs32436445        | 3.5                                       | 5.1E-03 | joint |
| 10367626 | 1700052N19Rik | 10               | 6320388             | mm37-10-6320388   | 3.5                                       | 5.1E-03 | joint |
| 10496110 | Papss1        | 3                | 131558405           | rs30664155        | 3.5                                       | 5.1E-03 | joint |
| 10560304 | Calm3         | 7                | 17644767            | rs31135872        | 3.5                                       | 5.1E-03 | joint |
| 10421723 | Dnajc15       | 14               | 77540081            | rs31010036        | 3.5                                       | 5.1E-03 | joint |
| 10402800 | Gpr132        | 12               | 114091939           | rs29176738        | 3.5                                       | 5.1E-03 | joint |
| 10573790 | Nod2          | 8                | 90876863            | rs32548698        | 3.5                                       | 5.1E-03 | joint |
| 10498296 | CommD2        | 3                | 57464323            | rs30356334        | 3.5                                       | 5.1E-03 | joint |
| 10579833 | Lsm6          | 8                | 80837427            | rs33387239        | 3.5                                       | 5.1E-03 | joint |
| 10491106 | Pld1          | 3                | 27805627            | rs31049355        | 3.5                                       | 5.1E-03 | joint |
| 10491597 | 4932438A13Rik | 3                | 37593832            | rs31474324        | 3.5                                       | 5.1E-03 | joint |
| 10488608 | Trib3         | 2                | 151493127           | rs6226184         | 3.5                                       | 5.1E-03 | joint |
| 10563178 | Cd37          | 7                | 51874922            | rs31108361        | 3.5                                       | 5.1E-03 | joint |
| 10438975 | Al480653      | 16               | 30521846            | rs4168249         | 3.5                                       | 5.1E-03 | joint |
| 10555460 | Stard10       | 7                | 108519175           | rs31201581        | 3.5                                       | 5.1E-03 | joint |
| 10360391 | Ifi203        | 1                | 176081804           | rs13476248        | 3.5                                       | 5.1E-03 | joint |
| 10445033 | Trim26        | 17               | 37003025            | mm37-17-37003025  | 3.5                                       | 5.1E-03 | joint |
| 10538963 | Rpl34         | 3                | 130577248           | rs30804395        | 3.5                                       | 5.1E-03 | joint |
| 10384138 | Tmed4         | 11               | 6168182             | rs26899782        | 3.5                                       | 5.1E-03 | joint |
| 10569494 | Tnfrsf22      | 7                | 150565771           | rs6307236         | 3.5                                       | 5.1E-03 | joint |
| 10347915 | Gm7609        | 1                | 84321318            | rs6218295         | 3.5                                       | 5.1E-03 | joint |
| 10385893 | Slc22a4       | 11               | 53866434            | rs29483899        | 3.5                                       | 5.1E-03 | joint |
| 10547251 | Bms1          | 6                | 118286718           | rs30662648        | 3.5                                       | 5.1E-03 | joint |
| 10549375 | Rps26         | 10               | 128411698           | rs6208640         | 3.5                                       | 5.1E-03 | joint |
| 10442396 | Abca3         | 17               | 24813221            | rs33626149        | 3.5                                       | 5.1E-03 | joint |
| 10378253 | Camkk1        | 11               | 72362875            | rs29444620        | 3.5                                       | 5.1E-03 | joint |
| 10439744 | Cd96          | 16               | 45873352            | rs4182049         | 3.5                                       | 5.1E-03 | joint |
| 10460573 | Eif1ad        | 19               | 5321056             | rs31303058        | 3.5                                       | 5.1E-03 | joint |
| 10356267 | A530032D15Rik | 1                | 84321318            | rs6218295         | 3.5                                       | 5.1E-03 | joint |
| 10550650 | Ercc1         | 7                | 19743810            | rs32247128        | 3.5                                       | 5.1E-03 | joint |
| 10347925 | Gm7609        | 1                | 84321318            | rs6218295         | 3.5                                       | 5.1E-03 | joint |
| 10375886 | D930048N14Rik | 11               | 51137809            | rs29389999        | 3.5                                       | 5.1E-03 | joint |
| 10581926 | Adat1         | 8                | 114582513           | rs32903835        | 3.5                                       | 5.1E-03 | joint |
| 10578019 | Nudc          | 4                | 132781978           | rs27541373        | 3.5                                       | 5.1E-03 | joint |

| Probe ID | Gene Symbol   | SNP Chrom (mm37) | SNP Position (mm37) | Best cis-eQTL SNP | Gene-level P-value (permutation analysis) | Q-value | Type  |
|----------|---------------|------------------|---------------------|-------------------|-------------------------------------------|---------|-------|
| 10572679 | Glt25d1       | 8                | 73235564            | rs33553972        | 3.5                                       | 5.1E-03 | joint |
| 10405248 | Hrh2          | 13               | 54017849            | rs29562820        | 3.5                                       | 5.1E-03 | joint |
| 10378068 | Xaf1          | 11               | 71854915            | rs29412896        | 3.5                                       | 5.1E-03 | joint |
| 10347672 | Stk11ip       | 1                | 75610471            | rs32497330        | 3.5                                       | 5.1E-03 | joint |
| 10502071 | 5730508B09Rik | 3                | 127269817           | rs31345996        | 3.5                                       | 5.1E-03 | joint |
| 10444788 | H2-Q1         | 17               | 35374902            | mm37-17-35374902  | 3.5                                       | 5.1E-03 | joint |
| 10551600 | Hnrnp1        | 7                | 30275278            | rs32425593        | 3.4                                       | 6.3E-03 | joint |
| 10373036 | Os9           | 10               | 126549813           | rs29382000        | 3.4                                       | 6.3E-03 | joint |
| 10569504 | Tnfrsf23      | 7                | 151347350           | rs31825474        | 3.4                                       | 6.3E-03 | joint |
| 10423498 | Dap           | 15               | 31148809            | rs6188331         | 3.4                                       | 6.3E-03 | joint |
| 10509562 | Mul1          | 4                | 137620466           | rs31969556        | 3.4                                       | 6.3E-03 | joint |
| 10479174 | Rps8          | 4                | 116499355           | rs27513773        | 3.4                                       | 6.3E-03 | joint |
| 10410287 | Zfp458        | 13               | 67602610            | rs29549507        | 3.4                                       | 6.3E-03 | joint |
| 10518520 | Ubiad1        | 4                | 147549464           | rs27648494        | 3.4                                       | 6.3E-03 | joint |
| 10431266 | Cerk          | 15               | 85940133            | rs31750172        | 3.4                                       | 6.3E-03 | joint |
| 10476197 | Itpa          | 2                | 129897341           | rs6366916         | 3.4                                       | 6.3E-03 | joint |
| 10514173 | Rpl34         | 3                | 130577248           | rs30804395        | 3.4                                       | 6.3E-03 | joint |
| 10444098 | Wdr46         | 17               | 34513408            | mm37-17-34513408  | 3.4                                       | 6.3E-03 | joint |
| 10428827 | Tmem65        | 15               | 58848020            | rs31921605        | 3.4                                       | 6.3E-03 | joint |
| 10582712 | Egln1         | 8                | 126521082           | rs33542690        | 3.4                                       | 6.3E-03 | joint |
| 10359405 | Klh120        | 1                | 162183761           | rs30986132        | 3.4                                       | 6.3E-03 | joint |
| 10532310 | 4930522L14Rik | 5                | 110375316           | rs3653994         | 3.4                                       | 6.3E-03 | joint |
| 10354275 | 1700029F09Rik | 1                | 43936501            | rs32686522        | 3.4                                       | 6.3E-03 | joint |
| 10440186 | Crybg3        | 16               | 58538819            | rs4190408         | 3.4                                       | 6.3E-03 | joint |
| 10581729 | Ddx19a        | 8                | 113875203           | rs31300031        | 3.4                                       | 6.3E-03 | joint |
| 10401028 | Sgpp1         | 12               | 76826539            | rs29489631        | 3.4                                       | 6.3E-03 | joint |
| 10387768 | Acadvl        | 11               | 68890200            | rs29388602        | 3.4                                       | 6.3E-03 | joint |
| 10441787 | Airn          | 17               | 13863978            | rs33479838        | 3.4                                       | 6.3E-03 | joint |
| 10416653 | Kbtbd7        | 14               | 80033649            | rs31537501        | 3.4                                       | 6.3E-03 | joint |
| 10488020 | Tmx4          | 2                | 134518263           | rs27252412        | 3.4                                       | 6.3E-03 | joint |
| 10475630 | Galk2         | 2                | 125890546           | rs32903359        | 3.4                                       | 6.3E-03 | joint |
| 10462111 | Gm9938        | 19               | 23049764            | rs30886302        | 3.4                                       | 6.3E-03 | joint |
| 10516305 | Mtap7d1       | 4                | 125927679           | rs6211332         | 3.4                                       | 6.3E-03 | joint |
| 10568758 | 9430038I01Rik | 7                | 144595282           | rs31284615        | 3.4                                       | 6.3E-03 | joint |
| 10429568 | Ly6c1         | 15               | 74816238            | rs32227722        | 3.4                                       | 6.3E-03 | joint |
| 10406551 | Ssbp2         | 13               | 91809780            | rs29496982        | 3.4                                       | 6.3E-03 | joint |
| 10404036 | Hist1h2bg     | 13               | 23495851            | rs6314855         | 3.4                                       | 6.3E-03 | joint |
| 10560103 | Rps8          | 4                | 116499355           | rs27513773        | 3.4                                       | 6.3E-03 | joint |
| 10459643 | 4930503L19Rik | 18               | 69780712            | rs30205079        | 3.4                                       | 6.3E-03 | joint |
| 10428857 | Mtss1         | 15               | 58916954            | rs31957783        | 3.4                                       | 6.3E-03 | joint |
| 10557591 | Itgal         | 7                | 134217351           | rs31543602        | 3.4                                       | 6.3E-03 | joint |
| 10571657 | Acs1          | 8                | 47935070            | rs33070153        | 3.4                                       | 6.3E-03 | joint |
| 10593015 | Cd3g          | 9                | 44883262            | rs30360106        | 3.4                                       | 6.3E-03 | joint |
| 10448748 | Nubp2         | 17               | 25241162            | rs33198520        | 3.4                                       | 6.3E-03 | joint |
| 10508936 | Ubxn11        | 4                | 132781978           | rs27541373        | 3.4                                       | 6.3E-03 | joint |
| 10346651 | Bmpr2         | 1                | 60420877            | rs6368854         | 3.4                                       | 6.3E-03 | joint |
| 10425781 | Serhl         | 15               | 82937328            | rs32113647        | 3.4                                       | 6.3E-03 | joint |
| 10444229 | H2-DMa        | 17               | 34545041            | mm37-17-34545041  | 3.4                                       | 6.3E-03 | joint |
| 10510574 | Errfi1        | 4                | 150397589           | rs32286055        | 3.4                                       | 6.3E-03 | joint |
| 10582669 | Ttc13         | 8                | 126435623           | rs6165611         | 3.4                                       | 6.3E-03 | joint |
| 10392953 | Gga3          | 11               | 115463929           | rs29440124        | 3.3                                       | 7.4E-03 | joint |
| 10379836 | Mrm1          | 11               | 84626729            | rs26953663        | 3.3                                       | 7.4E-03 | joint |

| Probe ID | Gene Symbol   | SNP Chrom (mm37) | SNP Position (mm37) | Best cis-eQTL SNP | Gene-level P-value (permutation analysis) | Q-value | Type  |
|----------|---------------|------------------|---------------------|-------------------|-------------------------------------------|---------|-------|
| 10586347 | Parp16        | 9                | 65290301            | rs6401447         | 3.3                                       | 7.4E-03 | joint |
| 10422493 | Gpr18         | 14               | 122352736           | rs31421893        | 3.3                                       | 7.4E-03 | joint |
| 10419867 | Homez         | 14               | 56219264            | rs31330444        | 3.3                                       | 7.4E-03 | joint |
| 10441740 | Agpat4        | 17               | 12046592            | rs33428908        | 3.3                                       | 7.4E-03 | joint |
| 10506188 | Pgm2          | 4                | 99642410            | rs3718520         | 3.3                                       | 7.4E-03 | joint |
| 10353849 | 4632411B12Rik | 1                | 35394655            | rs32678805        | 3.3                                       | 7.4E-03 | joint |
| 10459405 | Nars          | 18               | 64659744            | rs29880738        | 3.3                                       | 7.4E-03 | joint |
| 10488575 | Psmf1         | 2                | 150784906           | rs6246702         | 3.3                                       | 7.4E-03 | joint |
| 10474596 | Aven          | 2                | 112397798           | rs27491356        | 3.3                                       | 7.4E-03 | joint |
| 10519857 | Hgf           | 5                | 15877708            | rs29561409        | 3.3                                       | 7.4E-03 | joint |
| 10348547 | Ube2f         | 1                | 93035701            | rs3708228         | 3.3                                       | 7.4E-03 | joint |
| 10473793 | Psmc3         | 2                | 90863242            | rs27402423        | 3.3                                       | 7.4E-03 | joint |
| 10476326 | Cds2          | 2                | 132060646           | rs27261466        | 3.3                                       | 7.4E-03 | joint |
| 10408097 | Prss16        | 13               | 22036331            | rs6298616         | 3.3                                       | 7.4E-03 | joint |
| 10572804 | 1700030K09Rik | 8                | 74516271            | rs32779910        | 3.3                                       | 7.4E-03 | joint |
| 10386723 | Mapk7         | 11               | 62009810            | rs29477724        | 3.3                                       | 7.4E-03 | joint |
| 10430834 | Naga          | 15               | 82113966            | rs3688247         | 3.3                                       | 7.4E-03 | joint |
| 10535532 | Tecpr1        | 5                | 145070268           | rs32354808        | 3.3                                       | 7.4E-03 | joint |
| 10546184 | Plxna1        | 6                | 89208901            | rs30173362        | 3.3                                       | 7.4E-03 | joint |
| 10502335 | Bank1         | 3                | 135444878           | rs30560563        | 3.3                                       | 7.4E-03 | joint |
| 10403466 | Dip2c         | 13               | 9252397             | rs29512540        | 3.3                                       | 7.4E-03 | joint |
| 10516520 | Zfp362        | 4                | 128425092           | rs6246370         | 3.3                                       | 7.4E-03 | joint |
| 10429573 | Ly6c2         | 15               | 74816238            | rs32227722        | 3.3                                       | 7.4E-03 | joint |
| 10525439 | P2rx4         | 5                | 123295835           | rs3667964         | 3.3                                       | 7.4E-03 | joint |
| 10496387 | Dnajb14       | 3                | 137712099           | rs30366050        | 3.3                                       | 7.4E-03 | joint |
| 10456501 | Rnmt          | 18               | 68786652            | rs30215286        | 3.3                                       | 7.4E-03 | joint |
| 10466304 | Dtx4          | 19               | 12556585            | rs30662339        | 3.3                                       | 7.4E-03 | joint |
| 10494735 | Gdap2         | 3                | 100736041           | rs3159669         | 3.3                                       | 7.4E-03 | joint |
| 10360648 | Psen2         | 1                | 182527160           | rs32640339        | 3.3                                       | 7.4E-03 | joint |
| 10367734 | Ust           | 10               | 7013763             | mm37-10-7013763   | 3.3                                       | 7.4E-03 | joint |
| 10436830 | lfnar2        | 16               | 91166074            | rs4219004         | 3.3                                       | 7.4E-03 | joint |
| 10435048 | Tctex1d2      | 16               | 32504485            | rs4170352         | 3.3                                       | 7.4E-03 | joint |
| 10347254 | Smarcal1      | 1                | 72644687            | rs32375777        | 3.3                                       | 7.4E-03 | joint |
| 10518300 | Tnfrsf1b      | 4                | 144665748           | rs27601589        | 3.2                                       | 8.5E-03 | joint |
| 10475487 | Slc28a2       | 2                | 122012502           | rs27425615        | 3.2                                       | 8.5E-03 | joint |
| 10597627 | Oxsr1         | 9                | 119278549           | rs33655475        | 3.2                                       | 8.5E-03 | joint |
| 10572533 | Myo9b         | 8                | 72977422            | rs3662160         | 3.2                                       | 8.5E-03 | joint |
| 10398929 | Btbd6         | 12               | 114259702           | rs6202097         | 3.2                                       | 8.5E-03 | joint |
| 10380721 | Scrn2         | 11               | 96901154            | rs27023924        | 3.2                                       | 8.5E-03 | joint |
| 10551570 | Sirt2         | 7                | 29659759            | rs31834177        | 3.2                                       | 8.5E-03 | joint |
| 10440393 | Samsn1        | 16               | 75757232            | rs4205758         | 3.2                                       | 8.5E-03 | joint |
| 10371877 | Slc25a3       | 10               | 90873147            | rs29341914        | 3.2                                       | 8.5E-03 | joint |
| 10444658 | Clic1         | 17               | 35199955            | mm37-17-35199955  | 3.2                                       | 8.5E-03 | joint |
| 10404506 | Ripk1         | 13               | 33231875            | rs29731096        | 3.2                                       | 8.5E-03 | joint |
| 10594251 | Kif23         | 9                | 61753431            | rs30177109        | 3.2                                       | 8.5E-03 | joint |
| 10417130 | Ubac2         | 14               | 122352736           | rs31421893        | 3.2                                       | 8.5E-03 | joint |
| 10517687 | Gm16287       | 4                | 138913105           | rs27567958        | 3.2                                       | 8.5E-03 | joint |
| 10579724 | Slc35e1       | 8                | 74148950            | rs33257975        | 3.2                                       | 8.5E-03 | joint |
| 10577882 | Hgsnat        | 8                | 26074626            | rs33294613        | 3.2                                       | 8.5E-03 | joint |
| 10352348 | Cnih4         | 1                | 182372120           | rs32260232        | 3.2                                       | 8.5E-03 | joint |
| 10491083 | Nceh1         | 3                | 27103506            | rs3693773         | 3.2                                       | 8.5E-03 | joint |
| 10448016 | Tcte3         | 17               | 15845030            | rs33509212        | 3.2                                       | 8.5E-03 | joint |
| 10577096 | Pcid2         | 8                | 12963299            | rs6240019         | 3.2                                       | 8.5E-03 | joint |

| Probe ID | Gene Symbol   | SNP Chrom (mm37) | SNP Position (mm37) | Best cis-eQTL SNP | Gene-level P-value (permutation analysis) | Q-value | Type  |
|----------|---------------|------------------|---------------------|-------------------|-------------------------------------------|---------|-------|
| 10526087 | Sumf2         | 5                | 130265728           | rs33177836        | 3.2                                       | 8.5E-03 | joint |
| 10446441 | Ddx11         | 17               | 66117769            | rs3724865         | 3.2                                       | 8.5E-03 | joint |
| 10349049 | Zfp706        | 15               | 36914802            | rs32412313        | 3.2                                       | 8.5E-03 | joint |
| 10447294 | Prkce         | 17               | 86799227            | rs33462874        | 3.2                                       | 8.5E-03 | joint |
| 10412773 | Slc4a7        | 14               | 14647391            | rs30256817        | 3.2                                       | 8.5E-03 | joint |
| 10429391 | Slc45a4       | 15               | 73656388            | rs31592859        | 3.2                                       | 8.5E-03 | joint |
| 10437712 | Zc3h7a        | 16               | 11148720            | rs4161657         | 3.2                                       | 8.5E-03 | joint |
| 10373498 | Rps26         | 10               | 128411698           | rs6208640         | 3.2                                       | 8.5E-03 | joint |
| 10442236 | 3110052M02Rik | 17               | 21720906            | rs31300897        | 3.2                                       | 9.6E-03 | joint |
| 10571114 | Erlin2        | 8                | 28144682            | rs33564919        | 3.2                                       | 9.6E-03 | joint |
| 10373027 | Tspan31       | 10               | 126505512           | rs29332499        | 3.2                                       | 9.6E-03 | joint |
| 10514956 | Scp2          | 4                | 107172080           | rs28163295        | 3.2                                       | 9.6E-03 | joint |
| 10476691 | Polr3f        | 2                | 144392969           | rs33423270        | 3.2                                       | 9.6E-03 | joint |
| 10396402 | Prkch         | 12               | 74703805            | rs29183372        | 3.2                                       | 9.6E-03 | joint |
| 10584435 | Vwa5a         | 9                | 38271612            | rs30127804        | 3.2                                       | 9.6E-03 | joint |
| 10475866 | Bcl2l11       | 2                | 127962561           | rs27432128        | 3.2                                       | 9.6E-03 | joint |
| 10568233 | 9130019O22Rik | 7                | 135407911           | rs31629325        | 3.2                                       | 9.6E-03 | joint |
| 10516296 | Thrap3        | 4                | 125485262           | rs32914111        | 3.2                                       | 9.6E-03 | joint |
| 10572301 | Mef2b         | 8                | 72640167            | rs33113956        | 3.2                                       | 9.6E-03 | joint |
| 10448023 | Tcte3         | 17               | 15845030            | rs33509212        | 3.2                                       | 9.6E-03 | joint |
| 10517083 | Pigv          | 4                | 133297566           | rs31809658        | 3.2                                       | 9.6E-03 | joint |
| 10524718 | Rplp0         | 5                | 115720924           | rs33443020        | 3.2                                       | 9.6E-03 | joint |
| 10593213 | Rbm7          | 9                | 48368373            | rs3717644         | 3.2                                       | 9.6E-03 | joint |
| 10457853 | Ino80c        | 18               | 23647642            | rs29954242        | 3.2                                       | 9.6E-03 | joint |
| 10362359 | Pebp1         | 5                | 117930077           | rs13478481        | 3.2                                       | 9.6E-03 | joint |
| 10503711 | Casp8ap2      | 4                | 32723846            | rs27806695        | 3.2                                       | 9.6E-03 | joint |
| 10453736 | Unkl          | 17               | 25754240            | rs33564606        | 3.2                                       | 9.6E-03 | joint |
| 10449631 | Btbd9         | 17               | 31143300            | rs33654565        | 3.2                                       | 9.6E-03 | joint |
| 10444236 | H2-DMb2       | 17               | 33940053            | mm37-17-33940053  | 3.2                                       | 9.6E-03 | joint |
| 10579049 | Gm10033       | 8                | 72201228            | rs32954892        | 3.2                                       | 9.6E-03 | joint |
| 10594540 | Plekho2       | 9                | 65397210            | rs6360660         | 3.1                                       | 1.1E-02 | joint |
| 10595803 | Rnf7          | 9                | 96207157            | rs30273712        | 3.1                                       | 1.1E-02 | joint |
| 10496302 | Manba         | 3                | 134572525           | rs31621856        | 3.1                                       | 1.1E-02 | joint |
| 10414590 | Ear6          | 14               | 52703095            | rs3691964         | 3.1                                       | 1.1E-02 | joint |
| 10453166 | Cdkl4         | 17               | 80602577            | rs29709987        | 3.1                                       | 1.1E-02 | joint |
| 10459844 | Haus1         | 18               | 78935424            | rs30015747        | 3.1                                       | 1.1E-02 | joint |
| 10377550 | Trp53         | 11               | 70083661            | rs26920974        | 3.1                                       | 1.1E-02 | joint |
| 10485685 | Rpl35a        | 16               | 33064622            | rs4171166         | 3.1                                       | 1.1E-02 | joint |
| 10475525 | Pldn          | 2                | 122549260           | rs3726940         | 3.1                                       | 1.1E-02 | joint |
| 10367945 | Phactr2       | 10               | 13247820            | rs29319120        | 3.1                                       | 1.1E-02 | joint |
| 10387222 | Pfas          | 11               | 68711359            | rs29468815        | 3.1                                       | 1.1E-02 | joint |
| 10409990 | 6720489N17Rik | 13               | 63226418            | rs13481846        | 3.1                                       | 1.1E-02 | joint |
| 10385034 | Rpsa          | 9                | 119212345           | rs33759597        | 3.1                                       | 1.1E-02 | joint |
| 10461909 | BC016495      | 19               | 18728059            | rs31138880        | 3.1                                       | 1.1E-02 | joint |
| 10399360 | Rhob          | 12               | 8442395             | rs29132841        | 3.1                                       | 1.1E-02 | joint |
| 10356269 | Sp140         | 1                | 87878515            | rs3723583         | 3.1                                       | 1.1E-02 | joint |
| 10542842 | Ccdc91        | 6                | 147485122           | rs3686286         | 3.1                                       | 1.1E-02 | joint |
| 10379953 | 4632419I22Rik | 11               | 86469340            | rs27012092        | 3.1                                       | 1.1E-02 | joint |
| 10511661 | Otud6b        | 4                | 14209016            | rs27728188        | 3.1                                       | 1.1E-02 | joint |
| 10410124 | Ctsl          | 13               | 63620928            | rs29783022        | 3.1                                       | 1.1E-02 | joint |
| 10565002 | Crtc3         | 7                | 87904122            | rs31362919        | 3.1                                       | 1.1E-02 | joint |
| 10504373 | Gm12472       | 4                | 43663447            | rs28320603        | 3.1                                       | 1.1E-02 | joint |
| 10453918 | 3110002H16Rik | 18               | 11987071            | rs29912712        | 3.1                                       | 1.1E-02 | joint |
| 10489391 | Ada           | 2                | 163506876           | rs29498451        | 3.1                                       | 1.1E-02 | joint |

| Probe ID | Gene Symbol   | SNP Chrom (mm37) | SNP Position (mm37) | Best cis-eQTL SNP | Gene-level P-value (permutation analysis) | Q-value | Type  |
|----------|---------------|------------------|---------------------|-------------------|-------------------------------------------|---------|-------|
| 10441952 | 2210404J11Rik | 17               | 14833162            | rs33478834        | 3.1                                       | 1.1E-02 | joint |
| 10432488 | Bcdin3d       | 15               | 99404944            | rs3664324         | 3.0                                       | 1.1E-02 | joint |
| 10478169 | Dhx35         | 2                | 158594917           | rs27305491        | 3.0                                       | 1.1E-02 | joint |
| 10584634 | Usp2          | 9                | 44322554            | rs32609924        | 3.0                                       | 1.1E-02 | joint |
| 10410625 | Sdha          | 13               | 74877462            | rs29223975        | 3.0                                       | 1.1E-02 | joint |
| 10426909 | Letmd1        | 15               | 100293660           | rs3709293         | 3.0                                       | 1.1E-02 | joint |
| 10443021 | Atp6v0e       | 17               | 27261107            | rs33527411        | 3.0                                       | 1.1E-02 | joint |
| 10365749 | Lta4h         | 10               | 93708378            | rs29327254        | 3.0                                       | 1.1E-02 | joint |
| 10504831 | Sec61b        | 4                | 47855116            | rs6239869         | 3.0                                       | 1.1E-02 | joint |
| 10453049 | Cdc42ep3      | 17               | 79838396            | rs33604070        | 3.0                                       | 1.1E-02 | joint |
| 10534075 | Psph          | 5                | 130496212           | rs29631045        | 3.0                                       | 1.1E-02 | joint |
| 10437627 | Rpl35a        | 16               | 33064622            | rs4171166         | 3.0                                       | 1.1E-02 | joint |
| 10495896 | Camk2d        | 3                | 126328000           | rs30516581        | 3.0                                       | 1.1E-02 | joint |
| 10355974 | Wdfy1         | 1                | 80634119            | rs30204599        | 3.0                                       | 1.1E-02 | joint |
| 10565996 | Inpp1         | 7                | 108769955           | rs31326710        | 3.0                                       | 1.1E-02 | joint |
| 10408975 | Kif13a        | 13               | 47007650            | rs29811281        | 3.0                                       | 1.1E-02 | joint |
| 10495763 | Gclm          | 3                | 122675914           | rs30354722        | 3.0                                       | 1.1E-02 | joint |
| 10441706 | 1700010I14Rik | 17               | 9218223             | rs33285743        | 3.0                                       | 1.1E-02 | joint |
| 10586616 | Vps13c        | 9                | 67622974            | rs29697407        | 3.0                                       | 1.1E-02 | joint |
| 10443438 | Pnpla1        | 17               | 28830413            | rs6346412         | 3.0                                       | 1.1E-02 | joint |
| 10561837 | Zfp146        | 7                | 31279600            | rs31978143        | 3.0                                       | 1.1E-02 | joint |
| 10485340 | ltpa          | 2                | 129897341           | rs6366916         | 3.0                                       | 1.1E-02 | joint |
| 10559248 | Tspan32       | 7                | 150565771           | rs6307236         | 3.0                                       | 1.1E-02 | joint |
| 10502823 | Dnajb4        | 3                | 152614030           | rs31741345        | 3.0                                       | 1.1E-02 | joint |
| 10375864 | Agxt2l2       | 11               | 50429501            | rs26965588        | 3.0                                       | 1.1E-02 | joint |
| 10521798 | Pacrgl        | 5                | 48496535            | rs6411133         | 3.0                                       | 1.1E-02 | joint |
| 10447361 | Ttc7          | 17               | 87443522            | rs29798246        | 3.0                                       | 1.1E-02 | joint |
| 10497817 | Anxa5         | 3                | 37264336            | rs3151792         | 3.0                                       | 1.1E-02 | joint |
| 10366667 | Gns           | 10               | 121142981           | rs29359488        | 3.0                                       | 1.1E-02 | joint |
| 10389099 | Rad51l3       | 11               | 82765715            | rs29432702        | 3.0                                       | 1.2E-02 | joint |
| 10577544 | Polb          | 8                | 23824528            | rs4135461         | 3.0                                       | 1.2E-02 | joint |
| 10470936 | Tbc1d13       | 2                | 30268649            | rs13464645        | 3.0                                       | 1.2E-02 | joint |
| 10406757 | Col4a3bp      | 13               | 97351492            | rs29734096        | 3.0                                       | 1.2E-02 | joint |
| 10530503 | Cnga1         | 5                | 72616926            | rs31528146        | 3.0                                       | 1.2E-02 | joint |
| 10511325 | Rps20         | 4                | 3584944             | rs27682663        | 3.0                                       | 1.2E-02 | joint |
| 10462618 | lfit3         | 19               | 34756364            | rs30367140        | 3.0                                       | 1.2E-02 | joint |
| 10350742 | Rnasel        | 1                | 155614218           | rs30564058        | 3.0                                       | 1.2E-02 | joint |
| 10368762 | Cdc40         | 10               | 40358731            | rs29374324        | 3.0                                       | 1.2E-02 | joint |
| 10361790 | Fuca2         | 10               | 13247820            | rs29319120        | 3.0                                       | 1.2E-02 | joint |
| 10411915 | Ppwd1         | 13               | 105288962           | rs29918048        | 3.0                                       | 1.2E-02 | joint |
| 10490256 | Rps8          | 4                | 116499355           | rs27513773        | 3.0                                       | 1.2E-02 | joint |
| 10549162 | St8sia1       | 6                | 143094081           | rs6368858         | 3.0                                       | 1.2E-02 | joint |
| 10457508 | Npc1          | 18               | 12160804            | rs3720444         | 3.0                                       | 1.2E-02 | joint |
| 10495147 | Dennd2d       | 3                | 106973862           | rs30133561        | 3.0                                       | 1.2E-02 | joint |
| 10439854 | Bbx           | 16               | 50274601            | rs4185610         | 3.0                                       | 1.2E-02 | joint |
| 10570236 | Mcf2l         | 8                | 13605017            | rs6281754         | 3.0                                       | 1.2E-02 | joint |
| 10396778 | Mpp5          | 12               | 80028884            | rs6303798         | 3.0                                       | 1.2E-02 | joint |
| 10561008 | Ceacam1       | 7                | 26129230            | rs32227353        | 3.0                                       | 1.3E-02 | joint |
| 10466606 | Anxa1         | 19               | 20188567            | rs30523372        | 3.0                                       | 1.3E-02 | joint |
| 10511282 | Tnfrsf4       | 4                | 155383774           | rs6284920         | 3.0                                       | 1.3E-02 | joint |
| 10403462 | Dip2c         | 13               | 10248112            | rs30048367        | 3.0                                       | 1.3E-02 | joint |
| 10595831 | Zbtb38        | 9                | 96323590            | rs30177765        | 3.0                                       | 1.3E-02 | joint |
| 10574276 | Gpr97         | 8                | 97466278            | rs32122721        | 3.0                                       | 1.3E-02 | joint |
| 10495107 | Adora3        | 3                | 105169244           | rs30595214        | 3.0                                       | 1.3E-02 | joint |
| 10353032 | Rpa3          | 6                | 8407487             | rs29916108        | 3.0                                       | 1.3E-02 | joint |



| Probe ID | Gene Symbol   | SNP Chrom (mm37) | SNP Position (mm37) | Best cis-eQTL SNP | Gene-level P-value (permutation analysis) | Q-value | Type  |
|----------|---------------|------------------|---------------------|-------------------|-------------------------------------------|---------|-------|
| 10425923 | Fam118a       | 15               | 85524208            | rs32099700        | 3.0                                       | 1.3E-02 | joint |
| 10534216 | Gtf2i         | 5                | 134788332           | rs13486231        | 3.0                                       | 1.3E-02 | joint |
| 10522335 | Atp10d        | 5                | 73228949            | rs33387532        | 3.0                                       | 1.3E-02 | joint |
| 10383345 | Fscn2         | 11               | 120032171           | rs29483544        | 3.0                                       | 1.3E-02 | joint |
| 10399666 | 9030624G23Rik | 12               | 25497826            | rs29191921        | 3.0                                       | 1.3E-02 | joint |
| 10429298 | Trappc9       | 15               | 72748734            | rs32284145        | 3.0                                       | 1.3E-02 | joint |
| 10510624 | Klhl21        | 4                | 150454218           | rs31979269        | 3.0                                       | 1.3E-02 | joint |
| 10551120 | Megf8         | 7                | 26101338            | rs31480323        | 3.0                                       | 1.3E-02 | joint |
| 10532305 | 4930522L14Rik | 5                | 110375316           | rs3653994         | 3.0                                       | 1.3E-02 | joint |
| 10475718 | Snrnp200      | 2                | 127059991           | rs6346511         | 3.0                                       | 1.3E-02 | joint |
| 10344633 | Tcea1         | 1                | 4768024             | rs31791799        | 3.0                                       | 1.3E-02 | joint |
| 10390186 | Abi3          | 11               | 95158270            | rs29464862        | 3.0                                       | 1.3E-02 | joint |
| 10464218 | Fam160b1      | 19               | 56947673            | rs31052569        | 2.9                                       | 1.4E-02 | joint |
| 10530536 | Tec           | 5                | 72733958            | rs31531926        | 2.9                                       | 1.4E-02 | joint |
| 10512291 | Dctn3         | 4                | 40754093            | rs13477665        | 2.9                                       | 1.4E-02 | joint |
| 10534253 | Gtf2ird1      | 5                | 134788332           | rs13486231        | 2.9                                       | 1.4E-02 | joint |
| 10491486 | Atp11b        | 3                | 35473242            | rs29909670        | 2.9                                       | 1.4E-02 | joint |
| 10545751 | Tex261        | 6                | 83761274            | rs30416503        | 2.9                                       | 1.4E-02 | joint |
| 10474541 | Nop10         | 2                | 112397798           | rs27491356        | 2.9                                       | 1.4E-02 | joint |
| 10436783 | Sod1          | 16               | 90255906            | rs4217234         | 2.9                                       | 1.4E-02 | joint |
| 10457273 | Kif5b         | 18               | 6228620             | rs29822349        | 2.9                                       | 1.4E-02 | joint |
| 10561787 | Zfp27         | 7                | 30527305            | rs31148449        | 2.9                                       | 1.4E-02 | joint |
| 10435676 | Gsk3b         | 16               | 38132341            | rs4174411         | 2.9                                       | 1.4E-02 | joint |
| 10533007 | Ccdc64        | 5                | 115646273           | rs33589279        | 2.9                                       | 1.4E-02 | joint |
| 10419170 | Txndc16       | 14               | 46392697            | rs31241587        | 2.9                                       | 1.4E-02 | joint |
| 10389143 | Sfn8          | 11               | 83244758            | rs3662268         | 2.9                                       | 1.4E-02 | joint |
| 10426550 | Tmem106c      | 15               | 97855998            | rs31581769        | 2.9                                       | 1.4E-02 | joint |
| 10376507 | 4933439C10Rik | 11               | 59078936            | rs29399861        | 2.9                                       | 1.5E-02 | joint |
| 10350985 | Mrps14        | 1                | 162145996           | rs31342483        | 2.9                                       | 1.5E-02 | joint |
| 10381809 | Irgb3         | 11               | 104518979           | rs27038465        | 2.9                                       | 1.5E-02 | joint |
| 10407570 | Zmynd11       | 13               | 10268521            | rs36897899        | 2.9                                       | 1.5E-02 | joint |
| 10524018 | Rpl34         | 3                | 130577248           | rs30804395        | 2.9                                       | 1.5E-02 | joint |
| 10520250 | Nub1          | 5                | 24509818            | rs33486334        | 2.9                                       | 1.5E-02 | joint |
| 10399768 | Ttc15         | 12               | 29398947            | rs29212758        | 2.9                                       | 1.5E-02 | joint |
| 10532857 | Gltp          | 5                | 115700264           | rs29583537        | 2.9                                       | 1.5E-02 | joint |
| 10412711 | Uqcrb         | 13               | 67687808            | rs29834558        | 2.9                                       | 1.5E-02 | joint |
| 10566067 | Rnf121        | 7                | 108223861           | rs32200432        | 2.9                                       | 1.5E-02 | joint |
| 10573675 | Lonp2         | 8                | 88671915            | rs33300351        | 2.9                                       | 1.5E-02 | joint |
| 10406005 | Irx2          | 13               | 72381078            | rs30011210        | 2.9                                       | 1.5E-02 | joint |
| 10565759 | Uvr9          | 7                | 106021716           | rs31235564        | 2.9                                       | 1.6E-02 | joint |
| 10486710 | Lcmt2         | 2                | 120910944           | rs27454954        | 2.9                                       | 1.6E-02 | joint |
| 10491551 | Exosc9        | 3                | 37352792            | rs3158608         | 2.9                                       | 1.6E-02 | joint |
| 10542340 | 8430419L09Rik | 6                | 134378973           | rs30176386        | 2.9                                       | 1.6E-02 | joint |
| 10567022 | Btbd10        | 7                | 121397206           | rs31647638        | 2.9                                       | 1.6E-02 | joint |
| 10476969 | Pygb          | 2                | 151492992           | rs6225197         | 2.9                                       | 1.6E-02 | joint |
| 10530633 | Sgcb          | 5                | 73776541            | rs29548275        | 2.9                                       | 1.6E-02 | joint |
| 10436428 | Mina          | 16               | 59432512            | rs4191725         | 2.9                                       | 1.6E-02 | joint |
| 10360026 | Uqcrb         | 13               | 67687808            | rs29834558        | 2.9                                       | 1.6E-02 | joint |
| 10474006 | Phf21a        | 2                | 92814299            | rs13476640        | 2.9                                       | 1.6E-02 | joint |
| 10414548 | Rnase6        | 14               | 51805763            | rs30400951        | 2.9                                       | 1.6E-02 | joint |
| 10436865 | Ifngr2        | 16               | 92081867            | rs6285649         | 2.9                                       | 1.6E-02 | joint |
| 10529605 | Wfs1          | 5                | 36410915            | rs6161059         | 2.9                                       | 1.6E-02 | joint |
| 10550527 | Irf2bp1       | 7                | 19623601            | rs32365669        | 2.8                                       | 1.7E-02 | joint |
| 10374908 | Rtn4          | 11               | 29625957            | rs29420171        | 2.8                                       | 1.7E-02 | joint |
| 10540118 | Lsm3          | 6                | 91444913            | rs6230067         | 2.8                                       | 1.7E-02 | joint |

| Probe ID | Gene Symbol   | SNP Chrom (mm37) | SNP Position (mm37) | Best cis-eQTL SNP | Gene-level P-value (permutation analysis) | Q-value | Type  |
|----------|---------------|------------------|---------------------|-------------------|-------------------------------------------|---------|-------|
| 10384123 | Ddx56         | 11               | 6167406             | rs13480847        | 2.8                                       | 1.7E-02 | joint |
| 10582008 | 2310061C15Rik | 8                | 119617965           | rs6227798         | 2.8                                       | 1.7E-02 | joint |
| 10407985 | Gpr141        | 13               | 19885977            | rs29635196        | 2.8                                       | 1.7E-02 | joint |
| 10360834 | Hlx           | 1                | 186704249           | rs31785670        | 2.8                                       | 1.7E-02 | joint |
| 10352320 | Tmem63a       | 1                | 182871786           | rs31674207        | 2.8                                       | 1.7E-02 | joint |
| 10458913 | Cep120        | 18               | 54324899            | rs30307241        | 2.8                                       | 1.7E-02 | joint |
| 10542714 | Lym5          | 6                | 144557866           | rs30617674        | 2.8                                       | 1.7E-02 | joint |
| 10533316 | Erp29         | 5                | 121813345           | rs33216974        | 2.8                                       | 1.8E-02 | joint |
| 10361846 | Reps1         | 10               | 18317705            | rs29317189        | 2.8                                       | 1.8E-02 | joint |
| 10595466 | Pgm3          | 9                | 86687935            | rs30423308        | 2.8                                       | 1.8E-02 | joint |
| 10436849 | Ilfar1        | 16               | 91885909            | rs4219533         | 2.8                                       | 1.8E-02 | joint |
| 10586441 | Oaz2          | 9                | 65635795            | rs30188336        | 2.8                                       | 1.8E-02 | joint |
| 10593050 | Ili10ra       | 9                | 44638009            | rs29841687        | 2.8                                       | 1.8E-02 | joint |
| 10497773 | Mccc1         | 3                | 36583994            | rs3147048         | 2.8                                       | 1.8E-02 | joint |
| 10574423 | A330008L17Rik | 8                | 102923044           | rs32321710        | 2.8                                       | 1.8E-02 | joint |
| 10506880 | Kti12         | 4                | 108531685           | rs28150412        | 2.8                                       | 1.8E-02 | joint |
| 10459854 | F830208F22Rik | 18               | 78248089            | rs30177062        | 2.8                                       | 1.8E-02 | joint |
| 10376312 | Larp1         | 11               | 57876912            | rs29429879        | 2.8                                       | 1.9E-02 | joint |
| 10595529 | 4922501C03Rik | 9                | 86905654            | rs29695315        | 2.8                                       | 1.9E-02 | joint |
| 10410259 | Uqcrb         | 13               | 67687808            | rs29834558        | 2.8                                       | 1.9E-02 | joint |
| 10421749 | Akap11        | 14               | 78779541            | rs30323725        | 2.8                                       | 1.9E-02 | joint |
| 10495120 | Ovgp1         | 3                | 106330732           | rs31473892        | 2.8                                       | 1.9E-02 | joint |
| 10390271 | Nfe2l1        | 11               | 96579189            | rs6164096         | 2.8                                       | 1.9E-02 | joint |
| 10439642 | Slc35a5       | 16               | 44481216            | rs4179886         | 2.8                                       | 1.9E-02 | joint |
| 10476301 | Smox          | 2                | 131291839           | rs29930551        | 2.8                                       | 1.9E-02 | joint |
| 10430179 | Apol7b        | 15               | 76561282            | rs31682122        | 2.8                                       | 1.9E-02 | joint |
| 10486499 | Tmem87a       | 2                | 120697778           | rs27438933        | 2.8                                       | 1.9E-02 | joint |
| 10430956 | Cyb5r3        | 15               | 82937328            | rs32113647        | 2.8                                       | 1.9E-02 | joint |
| 10361156 | Rcor3         | 1                | 193468580           | rs30860614        | 2.8                                       | 1.9E-02 | joint |
| 10569485 | Tnfrsf26      | 7                | 151022596           | rs6318605         | 2.8                                       | 1.9E-02 | joint |
| 10593205 | Rexo2         | 9                | 48213816            | rs33643289        | 2.8                                       | 1.9E-02 | joint |
| 10594460 | Dis3l         | 9                | 64155869            | rs30015069        | 2.8                                       | 1.9E-02 | joint |
| 10535034 | Zfp68         | 5                | 138958111           | rs3661529         | 2.8                                       | 1.9E-02 | joint |
| 10479215 | Rps8          | 4                | 116499355           | rs27513773        | 2.7                                       | 2.0E-02 | joint |
| 10554926 | Ccdc90b       | 7                | 100108654           | rs31465001        | 2.7                                       | 2.0E-02 | joint |
| 10401172 | Vti1b         | 12               | 80028884            | rs6303798         | 2.7                                       | 2.0E-02 | joint |
| 10397818 | Cpsf2         | 12               | 102260123           | rs29206891        | 2.7                                       | 2.0E-02 | joint |
| 10461765 | Lpxn          | 19               | 13296084            | rs30317980        | 2.7                                       | 2.0E-02 | joint |
| 10398459 | Ppp2r5c       | 12               | 111469066           | rs29180355        | 2.7                                       | 2.0E-02 | joint |
| 10383867 | Mtmt3         | 11               | 4442382             | rs29417270        | 2.7                                       | 2.0E-02 | joint |
| 10497237 | Pag1          | 3                | 9925725             | rs30156006        | 2.7                                       | 2.0E-02 | joint |
| 10402835 | Nudt14        | 12               | 114259747           | rs29131909        | 2.7                                       | 2.0E-02 | joint |
| 10390640 | Ikzf3         | 11               | 98281665            | rs27070994        | 2.7                                       | 2.0E-02 | joint |
| 10517067 | Sfn           | 4                | 132642384           | rs33024223        | 2.7                                       | 2.0E-02 | joint |
| 10599346 | Polr2k        | 15               | 36365406            | rs32253436        | 2.7                                       | 2.0E-02 | joint |
| 10382376 | Ttyh2         | 11               | 114532979           | rs27029726        | 2.7                                       | 2.0E-02 | joint |
| 10542834 | Gm5887        | 6                | 147022874           | rs30765255        | 2.7                                       | 2.0E-02 | joint |
| 10469538 | 4930426L09Rik | 2                | 18951036            | rs29538801        | 2.7                                       | 2.0E-02 | joint |
| 10563780 | E2f8          | 7                | 56609802            | rs31628386        | 2.7                                       | 2.0E-02 | joint |
| 10521982 | Cbfa2t2       | 2                | 154215872           | rs6287924         | 2.7                                       | 2.1E-02 | joint |
| 10413008 | Fut11         | 14               | 21555395            | rs13472696        | 2.7                                       | 2.1E-02 | joint |
| 10345620 | Mrp130        | 1                | 38096577            | rs32244279        | 2.7                                       | 2.1E-02 | joint |
| 10570429 | Zfp828        | 8                | 14430267            | rs6280829         | 2.7                                       | 2.1E-02 | joint |
| 10530151 | Tlr6          | 5                | 65436811            | rs31444586        | 2.7                                       | 2.1E-02 | joint |
| 10380719 | Sp6           | 11               | 96444238            | rs29434627        | 2.7                                       | 2.1E-02 | joint |

| Probe ID | Gene Symbol   | SNP Chrom (mm37) | SNP Position (mm37) | Best cis-eQTL SNP | Gene-level P-value (permutation analysis) | Q-value | Type  |
|----------|---------------|------------------|---------------------|-------------------|-------------------------------------------|---------|-------|
| 10462005 | Tmem2         | 19               | 21928881            | rs31301051        | 2.7                                       | 2.1E-02 | joint |
| 10532989 | Gatc          | 5                | 115471963           | rs33324564        | 2.7                                       | 2.1E-02 | joint |
| 10505517 | Tlr4          | 4                | 65694556            | rs13477747        | 2.7                                       | 2.1E-02 | joint |
| 10503833 | Rplp1         | 9                | 62560178            | rs6339706         | 2.7                                       | 2.1E-02 | joint |
| 10501963 | Ugt8a         | 3                | 125634898           | rs30599218        | 2.7                                       | 2.1E-02 | joint |
| 10369206 | Rps8          | 4                | 116499355           | rs27513773        | 2.7                                       | 2.1E-02 | joint |
| 10409737 | Agtppb1       | 13               | 60473031            | rs29589851        | 2.7                                       | 2.2E-02 | joint |
| 10544829 | Jazf1         | 6                | 53059848            | rs30752964        | 2.7                                       | 2.2E-02 | joint |
| 10353135 | Ncoa2         | 1                | 13184872            | rs31477656        | 2.7                                       | 2.2E-02 | joint |
| 10373000 | Xrcc6bp1      | 10               | 126210709           | rs29332948        | 2.7                                       | 2.2E-02 | joint |
| 10532753 | Coro1c        | 5                | 114306753           | rs33601130        | 2.7                                       | 2.2E-02 | joint |
| 10532802 | Alkbh2        | 5                | 114599562           | rs33429598        | 2.7                                       | 2.2E-02 | joint |
| 10397002 | Sipa111       | 12               | 83338338            | rs6330889         | 2.7                                       | 2.2E-02 | joint |
| 10472058 | Rif1          | 2                | 51103744            | rs33353352        | 2.7                                       | 2.2E-02 | joint |
| 10573703 | Tmem188       | 8                | 90847735            | rs33010793        | 2.7                                       | 2.2E-02 | joint |
| 10360737 | Rpl35a        | 16               | 33064622            | rs4171166         | 2.7                                       | 2.2E-02 | joint |
| 10405535 | B230219D22Rik | 13               | 54996852            | rs29572215        | 2.7                                       | 2.2E-02 | joint |
| 10468231 | Arl3          | 19               | 45941380            | rs3718843         | 2.7                                       | 2.3E-02 | joint |
| 10502329 | Cisd2         | 3                | 134956405           | rs30604246        | 2.7                                       | 2.3E-02 | joint |
| 10498771 | Pdcd10        | 3                | 76195638            | rs30405476        | 2.7                                       | 2.3E-02 | joint |
| 10514732 | Slc35d1       | 4                | 102090853           | rs32197109        | 2.7                                       | 2.3E-02 | joint |
| 10427895 | Basp1         | 15               | 25336862            | rs3667619         | 2.7                                       | 2.3E-02 | joint |
| 10357790 | Sox13         | 1                | 135409223           | rs32494351        | 2.7                                       | 2.3E-02 | joint |
| 10565634 | Myo7a         | 7                | 104967888           | rs31747372        | 2.7                                       | 2.3E-02 | joint |
| 10453429 | Pigf          | 17               | 87327330            | rs6268795         | 2.7                                       | 2.3E-02 | joint |
| 10572212 | Gmip          | 8                | 72463828            | rs32629017        | 2.7                                       | 2.3E-02 | joint |
| 10444927 | Nrm           | 17               | 35740822            | mm37-17-35740822  | 2.7                                       | 2.3E-02 | joint |
| 10540472 | Bhlhe40       | 6                | 108301859           | rs30119858        | 2.7                                       | 2.3E-02 | joint |
| 10563050 | Prr12         | 7                | 51570774            | rs6405901         | 2.6                                       | 2.3E-02 | joint |
| 10420320 | Cenpj         | 14               | 57152053            | rs30604442        | 2.6                                       | 2.3E-02 | joint |
| 10390950 | Gm11564       | 11               | 98865158            | rs27102250        | 2.6                                       | 2.3E-02 | joint |
| 10594613 | Usp3          | 9                | 66787809            | rs33717498        | 2.6                                       | 2.3E-02 | joint |
| 10507908 | Fhl3          | 4                | 124290513           | rs27555528        | 2.6                                       | 2.3E-02 | joint |
| 10551065 | D930028M14Rik | 7                | 26101338            | rs31480323        | 2.6                                       | 2.3E-02 | joint |
| 10550597 | Fbxo46        | 7                | 19721583            | rs6260413         | 2.6                                       | 2.3E-02 | joint |
| 10440406 | Nrip1         | 16               | 76177962            | rs4206160         | 2.6                                       | 2.3E-02 | joint |
| 10584941 | Bace1         | 9                | 45087792            | rs30359695        | 2.6                                       | 2.3E-02 | joint |
| 10396278 | Daam1         | 12               | 73481149            | rs3724186         | 2.6                                       | 2.3E-02 | joint |
| 10488382 | Cd93          | 2                | 148207741           | rs33143355        | 2.6                                       | 2.3E-02 | joint |
| 10440926 | Dnajc28       | 16               | 92081867            | rs6285649         | 2.6                                       | 2.3E-02 | joint |
| 10455483 | Ythdc2        | 18               | 44838593            | rs6281938         | 2.6                                       | 2.3E-02 | joint |
| 10552740 | Nup62         | 7                | 52250686            | rs32051036        | 2.6                                       | 2.4E-02 | joint |
| 10456798 | Hdhd2         | 18               | 76374660            | rs29672377        | 2.6                                       | 2.4E-02 | joint |
| 10505000 | Nipsnap3a     | 4                | 53442816            | rs27779509        | 2.6                                       | 2.4E-02 | joint |
| 10470462 | Col5a1        | 2                | 28005358            | rs27197977        | 2.6                                       | 2.4E-02 | joint |
| 10576305 | Tcf25         | 8                | 125972572           | rs33432761        | 2.6                                       | 2.4E-02 | joint |
| 10501832 | Abcd3         | 3                | 122194084           | rs30419088        | 2.6                                       | 2.4E-02 | joint |
| 10396694 | Churc1        | 12               | 77873825            | rs29183071        | 2.6                                       | 2.4E-02 | joint |
| 10542445 | Strap         | 6                | 137446748           | rs30843251        | 2.6                                       | 2.4E-02 | joint |
| 10546791 | Sumf1         | 6                | 108479248           | rs30229283        | 2.6                                       | 2.4E-02 | joint |
| 10396442 | Snapc1        | 12               | 74991059            | rs29202209        | 2.6                                       | 2.4E-02 | joint |
| 10393687 | Azi1          | 11               | 120032171           | rs29483544        | 2.6                                       | 2.4E-02 | joint |
| 10489186 | Rpl35a        | 16               | 33064622            | rs4171166         | 2.6                                       | 2.5E-02 | joint |
| 10402268 | Lgmn          | 12               | 103631471           | rs29171624        | 2.6                                       | 2.5E-02 | joint |

| Probe ID | Gene Symbol   | SNP Chrom (mm37) | SNP Position (mm37) | Best cis-eQTL SNP | Gene-level P-value (permutation analysis) | Q-value | Type  |
|----------|---------------|------------------|---------------------|-------------------|-------------------------------------------|---------|-------|
| 10597900 | Zfp445        | 9                | 122819320           | rs29976441        | 2.6                                       | 2.5E-02 | joint |
| 10455989 | Rbm22         | 18               | 61140136            | rs6334696         | 2.6                                       | 2.5E-02 | joint |
| 10452937 | Heatr5b       | 17               | 78951702            | rs3670726         | 2.6                                       | 2.5E-02 | joint |
| 10583402 | Zfp317        | 9                | 19270016            | rs30162988        | 2.6                                       | 2.5E-02 | joint |
| 10499716 | Ubap2l        | 3                | 90000401            | rs30607762        | 2.6                                       | 2.5E-02 | joint |
| 10539907 | Tpra1         | 6                | 89320559            | rs30220244        | 2.6                                       | 2.5E-02 | joint |
| 10456995 | Txn14a        | 18               | 80987560            | rs30301873        | 2.6                                       | 2.5E-02 | joint |
| 10394477 | Laptm4a       | 12               | 9470091             | rs29137060        | 2.6                                       | 2.5E-02 | joint |
| 10585860 | Adpgk         | 9                | 59178045            | rs29736662        | 2.6                                       | 2.5E-02 | joint |
| 10360040 | Fcgr3         | 1                | 172970025           | rs32678315        | 2.6                                       | 2.5E-02 | joint |
| 10449652 | Dnahc8        | 17               | 29917069            | rs3693494         | 2.6                                       | 2.5E-02 | joint |
| 10498155 | Rps14         | 18               | 60666455            | rs6324468         | 2.6                                       | 2.6E-02 | joint |
| 10464647 | Tbc1d10c      | 19               | 4652712             | rs30959235        | 2.6                                       | 2.6E-02 | joint |
| 10544002 | Creb3l2       | 6                | 37481775            | rs6330932         | 2.6                                       | 2.6E-02 | joint |
| 10520271 | 2900005115Rik | 5                | 24647720            | rs29821175        | 2.6                                       | 2.6E-02 | joint |
| 10387525 | Mpdu1         | 11               | 68786528            | rs29433934        | 2.6                                       | 2.6E-02 | joint |
| 10520513 | 4930471M23Rik | 5                | 31122738            | rs29631774        | 2.6                                       | 2.6E-02 | joint |
| 10424411 | Tsg101        | 7                | 53456332            | rs31528732        | 2.6                                       | 2.6E-02 | joint |
| 10541885 | Scnn1a        | 6                | 126168445           | rs30954202        | 2.6                                       | 2.6E-02 | joint |
| 10360789 | Degs1         | 1                | 184461100           | rs31741702        | 2.6                                       | 2.6E-02 | joint |
| 10526735 | Zscan21       | 5                | 138360832           | rs8265976         | 2.6                                       | 2.6E-02 | joint |
| 10516652 | lqcc          | 4                | 129360089           | rs27487632        | 2.6                                       | 2.6E-02 | joint |
| 10487513 | Anapc1        | 2                | 127586140           | rs33579568        | 2.6                                       | 2.6E-02 | joint |
| 10576274 | Zfp276        | 8                | 125573046           | rs6242679         | 2.6                                       | 2.6E-02 | joint |
| 10481368 | Trub2         | 2                | 29485035            | rs27201282        | 2.6                                       | 2.6E-02 | joint |
| 10407319 | Rpl34         | 3                | 130266226           | rs30911073        | 2.6                                       | 2.6E-02 | joint |
| 10556528 | Pde3b         | 7                | 121440758           | rs6256808         | 2.6                                       | 2.6E-02 | joint |
| 10455588 | Hspe1         | 1                | 55612052            | rs3723035         | 2.6                                       | 2.6E-02 | joint |
| 10382838 | 1810032O08Rik | 11               | 116591416           | rs29406603        | 2.6                                       | 2.6E-02 | joint |
| 10377612 | Plscr3        | 11               | 69146229            | rs29432944        | 2.6                                       | 2.6E-02 | joint |
| 10539080 | St3gal5       | 6                | 72614156            | rs30219729        | 2.6                                       | 2.7E-02 | joint |
| 10550394 | Ptgir         | 7                | 17259509            | rs31426810        | 2.6                                       | 2.7E-02 | joint |
| 10468311 | Sh3pxd2a      | 19               | 47535259            | rs30321371        | 2.6                                       | 2.7E-02 | joint |
| 10506274 | Dnajc6        | 4                | 101392863           | rs32490226        | 2.6                                       | 2.7E-02 | joint |
| 10503363 | Rbm12b        | 4                | 11627403            | rs31814977        | 2.6                                       | 2.7E-02 | joint |
| 10542079 | Foxm1         | 6                | 128507691           | rs29971833        | 2.6                                       | 2.7E-02 | joint |
| 10563615 | Hps5          | 7                | 53720160            | rs6364611         | 2.5                                       | 2.8E-02 | joint |
| 10435455 | Rpl35a        | 16               | 33064622            | rs4171166         | 2.5                                       | 2.8E-02 | joint |
| 10532921 | Spp13         | 5                | 116028399           | rs33183771        | 2.5                                       | 2.8E-02 | joint |
| 10510129 | Dhrs3         | 4                | 144870506           | rs27627557        | 2.5                                       | 2.8E-02 | joint |
| 10435004 | 1500031L02Rik | 16               | 32766708            | rs4170615         | 2.5                                       | 2.8E-02 | joint |
| 10572669 | Fam129c       | 8                | 73174378            | rs32707454        | 2.5                                       | 2.8E-02 | joint |
| 10516884 | Trnau1ap      | 4                | 132781978           | rs27541373        | 2.5                                       | 2.8E-02 | joint |
| 10506134 | Atg4c         | 4                | 98936968            | rs28109068        | 2.5                                       | 2.8E-02 | joint |
| 10427454 | Card6         | 15               | 5293817             | rs6289794         | 2.5                                       | 2.8E-02 | joint |
| 10436348 | Tomm70a       | 16               | 57510798            | rs3709079         | 2.5                                       | 2.8E-02 | joint |
| 10415662 | Rcbtb1        | 14               | 59629278            | rs30907644        | 2.5                                       | 2.8E-02 | joint |
| 10460018 | Zfp236        | 18               | 83598896            | rs29578250        | 2.5                                       | 2.8E-02 | joint |
| 10348618 | Asb1          | 1                | 93333537            | rs31606310        | 2.5                                       | 2.8E-02 | joint |
| 10382470 | Tmem104       | 11               | 114985564           | rs29471047        | 2.5                                       | 2.8E-02 | joint |
| 10411306 | Polk          | 13               | 97285071            | rs29633246        | 2.5                                       | 2.8E-02 | joint |
| 10453260 | Haao          | 17               | 84230336            | rs33553636        | 2.5                                       | 2.9E-02 | joint |
| 10350247 | Kif21b        | 1                | 138723844           | rs30502059        | 2.5                                       | 2.9E-02 | joint |
| 10454842 | Ube2d2        | 18               | 36778428            | rs29625675        | 2.5                                       | 2.9E-02 | joint |
| 10417749 | Ube2e1        | 14               | 18247303            | rs30660151        | 2.5                                       | 2.9E-02 | joint |

| Probe ID | Gene Symbol   | SNP Chrom (mm37) | SNP Position (mm37) | Best cis-eQTL SNP | Gene-level P-value (permutation analysis) | Q-value | Type  |
|----------|---------------|------------------|---------------------|-------------------|-------------------------------------------|---------|-------|
| 10556658 | 9030624J02Rik | 7                | 125838946           | rs32474210        | 2.5                                       | 2.9E-02 | joint |
| 10466439 | Pebp1         | 5                | 117930077           | rs13478481        | 2.5                                       | 2.9E-02 | joint |
| 10362129 | Vnn3          | 10               | 23402924            | rs29381450        | 2.5                                       | 2.9E-02 | joint |
| 10531208 | Cox18         | 5                | 90681960            | rs29508640        | 2.5                                       | 2.9E-02 | joint |
| 10349333 | 3110009E18Rik | 1                | 122725754           | rs30734173        | 2.5                                       | 3.0E-02 | joint |
| 10503134 | Sdcbp         | 4                | 6797458             | rs27674838        | 2.5                                       | 3.0E-02 | joint |
| 10444895 | Flot1         | 17               | 35831079            | mm37-17-35831079  | 2.5                                       | 3.0E-02 | joint |
| 10519151 | Mib2          | 4                | 154887311           | rs6201741         | 2.5                                       | 3.0E-02 | joint |
| 10552779 | Fuz           | 7                | 52898483            | rs32222012        | 2.5                                       | 3.0E-02 | joint |
| 10400941 | Dhrs7         | 12               | 73178478            | rs29173056        | 2.5                                       | 3.0E-02 | joint |
| 10455647 | Tnfaip8       | 18               | 49339947            | rs30246269        | 2.5                                       | 3.0E-02 | joint |
| 10596815 | Rnf123        | 9                | 108042615           | rs29989915        | 2.5                                       | 3.0E-02 | joint |
| 10517336 | Clic4         | 4                | 134574671           | rs6371478         | 2.5                                       | 3.0E-02 | joint |
| 10491603 | 4932438A13Rik | 3                | 37560742            | rs30085634        | 2.5                                       | 3.0E-02 | joint |
| 10514392 | Tusc1         | 4                | 93185456            | rs32755743        | 2.5                                       | 3.0E-02 | joint |
| 10425040 | Apol7e        | 15               | 76545541            | rs32342299        | 2.5                                       | 3.0E-02 | joint |
| 10416753 | Pibf1         | 14               | 99106102            | rs31252585        | 2.5                                       | 3.0E-02 | joint |
| 10524781 | Rab35         | 5                | 116028399           | rs33183771        | 2.5                                       | 3.0E-02 | joint |
| 10496438 | Adh1          | 3                | 137721707           | rs30882081        | 2.5                                       | 3.0E-02 | joint |
| 10553354 | Nav2          | 7                | 56124204            | rs32245660        | 2.5                                       | 3.0E-02 | joint |
| 10439058 | Lrrc33        | 16               | 31342465            | rs4168997         | 2.5                                       | 3.0E-02 | joint |
| 10456001 | Rps14         | 18               | 60666455            | rs6324468         | 2.5                                       | 3.0E-02 | joint |
| 10430945 | Poldip3       | 15               | 82931730            | rs31775148        | 2.5                                       | 3.0E-02 | joint |
| 10463632 | Tmem180       | 19               | 45952834            | rs3671238         | 2.5                                       | 3.0E-02 | joint |
| 10550978 | Phldb3        | 7                | 25119077            | rs32341931        | 2.5                                       | 3.0E-02 | joint |
| 10545001 | Ppm1k         | 6                | 57659921            | rs30902330        | 2.5                                       | 3.0E-02 | joint |
| 10510399 | Masp2         | 4                | 147874905           | rs27599611        | 2.5                                       | 3.0E-02 | joint |
| 10402140 | Gm10431       | 12               | 102149223           | rs29203855        | 2.5                                       | 3.0E-02 | joint |
| 10407792 | Gpr137b-ps    | 13               | 12465870            | rs3716238         | 2.5                                       | 3.0E-02 | joint |
| 10571274 | Gsr           | 8                | 34097219            | rs33386424        | 2.5                                       | 3.0E-02 | joint |
| 10501860 | Fnbp1l        | 3                | 122367049           | rs6217051         | 2.5                                       | 3.1E-02 | joint |
| 10449266 | Itfg3         | 17               | 26440528            | rs29522863        | 2.5                                       | 3.1E-02 | joint |
| 10507040 | Spta6         | 4                | 111483605           | rs27515792        | 2.5                                       | 3.1E-02 | joint |
| 10460057 | Tshz1         | 18               | 84326190            | rs29968809        | 2.5                                       | 3.1E-02 | joint |
| 10450699 | H2-Q2         | 17               | 35374982            | mm37-17-35374982  | 2.5                                       | 3.1E-02 | joint |
| 10594652 | Lactb         | 9                | 66888400            | rs30524357        | 2.5                                       | 3.1E-02 | joint |
| 10384145 | H2afv         | 11               | 6168182             | rs26899782        | 2.5                                       | 3.1E-02 | joint |
| 10505643 | 4930473A06Rik | 4                | 83976236            | rs28101086        | 2.5                                       | 3.1E-02 | joint |
| 10412251 | Ndufs4        | 13               | 114824365           | rs29547399        | 2.5                                       | 3.1E-02 | joint |
| 10444605 | Vars          | 17               | 36100416            | mm37-17-36100416  | 2.5                                       | 3.1E-02 | joint |
| 10419370 | Exoc5         | 14               | 50085299            | rs30596041        | 2.5                                       | 3.1E-02 | joint |
| 10587639 | Nt5e          | 9                | 88068525            | rs29885916        | 2.5                                       | 3.1E-02 | joint |
| 10509635 | Akr7a5        | 4                | 139457637           | rs27612037        | 2.5                                       | 3.1E-02 | joint |
| 10542264 | 2700089E24Rik | 6                | 132335959           | rs30712128        | 2.5                                       | 3.1E-02 | joint |
| 10593024 | Cd3e          | 9                | 44789625            | rs29749035        | 2.5                                       | 3.1E-02 | joint |
| 10351353 | Cd247         | 1                | 167611765           | rs31408859        | 2.5                                       | 3.1E-02 | joint |
| 10573082 | Inpp4b        | 8                | 84724492            | rs33367345        | 2.5                                       | 3.1E-02 | joint |
| 10442057 | Riok2         | 17               | 17966665            | rs29503159        | 2.5                                       | 3.1E-02 | joint |
| 10516943 | Atpif1        | 4                | 132116095           | rs32955860        | 2.5                                       | 3.1E-02 | joint |
| 10479228 | Etohi1        | 2                | 178324499           | rs33407067        | 2.5                                       | 3.1E-02 | joint |
| 10380477 | Ppp1r9b       | 11               | 94582344            | rs6366267         | 2.5                                       | 3.1E-02 | joint |
| 10563891 | Nck2          | 1                | 44265387            | rs6222550         | 2.4                                       | 3.2E-02 | joint |

| Probe ID | Gene Symbol   | SNP Chrom (mm37) | SNP Position (mm37) | Best cis-eQTL SNP | Gene-level P-value (permutation analysis) | Q-value | Type  |
|----------|---------------|------------------|---------------------|-------------------|-------------------------------------------|---------|-------|
| 10526145 | O610007L01Rik | 5                | 131092689           | rs33441667        | 2.4                                       | 3.2E-02 | joint |
| 10577230 | Erich1        | 8                | 13605017            | rs6281754         | 2.4                                       | 3.2E-02 | joint |
| 10520419 | Ube3c         | 5                | 30100397            | rs29564746        | 2.4                                       | 3.2E-02 | joint |
| 10447349 | Cript         | 17               | 87443522            | rs29798246        | 2.4                                       | 3.2E-02 | joint |
| 10555389 | Ucp2          | 7                | 108164967           | rs31037097        | 2.4                                       | 3.2E-02 | joint |
| 10527547 | Mtif3         | 5                | 148016306           | rs33127996        | 2.4                                       | 3.2E-02 | joint |
| 10392856 | Nat9          | 11               | 115129532           | rs29452428        | 2.4                                       | 3.2E-02 | joint |
| 10361104 | Ppp2r5a       | 1                | 193264692           | rs31727476        | 2.4                                       | 3.2E-02 | joint |
| 10567171 | Rps13         | 7                | 123290980           | rs3684383         | 2.4                                       | 3.3E-02 | joint |
| 10499309 | Apoa1bp       | 3                | 87854631            | rs31640799        | 2.4                                       | 3.3E-02 | joint |
| 10419082 | 5730469M10Rik | 14               | 41249102            | rs6360949         | 2.4                                       | 3.3E-02 | joint |
| 10507520 | Hyi           | 4                | 118503791           | rs27494641        | 2.4                                       | 3.3E-02 | joint |
| 10383999 | Mrps24        | 11               | 5630318             | rs26884997        | 2.4                                       | 3.3E-02 | joint |
| 10470050 | Abca2         | 2                | 25362101            | rs27210461        | 2.4                                       | 3.3E-02 | joint |
| 10544976 | Kbtbd2        | 6                | 56681390            | rs30760848        | 2.4                                       | 3.3E-02 | joint |
| 10475000 | Rtf1          | 2                | 119403415           | rs33072899        | 2.4                                       | 3.3E-02 | joint |
| 10508420 | Yars          | 4                | 128659383           | rs6334688         | 2.4                                       | 3.3E-02 | joint |
| 10517883 | Necap2        | 4                | 140713786           | rs32671622        | 2.4                                       | 3.3E-02 | joint |
| 10501048 | 2010016118Rik | 3                | 105421957           | rs31691760        | 2.4                                       | 3.3E-02 | joint |
| 10461844 | Gnaq          | 19               | 16185584            | rs6342609         | 2.4                                       | 3.3E-02 | joint |
| 10579976 | Elmod2        | 8                | 85934141            | rs32919377        | 2.4                                       | 3.3E-02 | joint |
| 10578377 | Frg1          | 8                | 42528102            | rs3165545         | 2.4                                       | 3.3E-02 | joint |
| 10564507 | Arrdc4        | 7                | 75206551            | rs32453663        | 2.4                                       | 3.3E-02 | joint |
| 10483584 | Mettl8        | 2                | 70937848            | rs33174507        | 2.4                                       | 3.3E-02 | joint |
| 10358064 | Ipo9          | 1                | 136413808           | rs30869517        | 2.4                                       | 3.3E-02 | joint |
| 10372082 | Nudt4         | 10               | 95008040            | rs6196828         | 2.4                                       | 3.4E-02 | joint |
| 10354157 | Chst10        | 1                | 38965805            | rs6323941         | 2.4                                       | 3.4E-02 | joint |
| 10395612 | G2e3          | 12               | 52583138            | rs6267394         | 2.4                                       | 3.4E-02 | joint |
| 10407251 | Ccno          | 13               | 114495733           | rs29527544        | 2.4                                       | 3.4E-02 | joint |
| 10508392 | Rnf19b        | 4                | 129125982           | rs31775195        | 2.4                                       | 3.5E-02 | joint |
| 10454414 | Pik3c3        | 18               | 30090864            | rs13483275        | 2.4                                       | 3.5E-02 | joint |
| 10511290 | Tnfrsf18      | 4                | 155388389           | rs32224289        | 2.4                                       | 3.5E-02 | joint |
| 10494160 | Tmod4         | 3                | 94933346            | rs30257773        | 2.4                                       | 3.5E-02 | joint |
| 10550574 | Dmpk          | 7                | 20015306            | rs31098779        | 2.4                                       | 3.5E-02 | joint |
| 10408600 | Serpinb6a     | 13               | 34249342            | rs29237475        | 2.4                                       | 3.5E-02 | joint |
| 10488195 | Rrbp1         | 2                | 143780025           | rs27264453        | 2.4                                       | 3.5E-02 | joint |
| 10549361 | Tm7sf3        | 6                | 146359925           | rs30741186        | 2.4                                       | 3.5E-02 | joint |
| 10383282 | Chmp6         | 11               | 119986865           | rs27013742        | 2.4                                       | 3.5E-02 | joint |
| 10551347 | Blvrb         | 7                | 28289392            | rs31161692        | 2.4                                       | 3.5E-02 | joint |
| 10356968 | Pam           | 1                | 100089736           | rs6361718         | 2.4                                       | 3.5E-02 | joint |
| 10443598 | Dnahc8        | 17               | 31117874            | rs6282714         | 2.4                                       | 3.5E-02 | joint |
| 10586920 | Rfx7          | 9                | 72307604            | rs3718833         | 2.4                                       | 3.5E-02 | joint |
| 10585699 | Fabp5         | 3                | 9912297             | rs31388033        | 2.4                                       | 3.5E-02 | joint |
| 10562416 | Cebpg         | 7                | 35554561            | rs31595471        | 2.4                                       | 3.5E-02 | joint |
| 10384885 | Sponb2        | 11               | 30083667            | rs26860813        | 2.4                                       | 3.5E-02 | joint |
| 10518686 | Pik3cd        | 4                | 148329368           | rs32511975        | 2.4                                       | 3.5E-02 | joint |
| 10571849 | Fbxo8         | 8                | 58429426            | rs32873199        | 2.4                                       | 3.6E-02 | joint |
| 10576417 | Galnt2        | 8                | 125798415           | rs32995456        | 2.4                                       | 3.6E-02 | joint |
| 10440037 | Nit2          | 16               | 56693973            | rs4188876         | 2.4                                       | 3.6E-02 | joint |
| 10425092 | Cyth4         | 15               | 79294488            | rs3678019         | 2.4                                       | 3.6E-02 | joint |
| 10597518 | Tgfbf2        | 9                | 116298298           | rs29742003        | 2.4                                       | 3.6E-02 | joint |
| 10445241 | Tnfrsf21      | 17               | 43827855            | rs33244454        | 2.4                                       | 3.6E-02 | joint |
| 10483249 | Galnt3        | 2                | 65936548            | rs6232577         | 2.4                                       | 3.6E-02 | joint |
| 10492102 | Spg20         | 3                | 54978078            | rs6263547         | 2.4                                       | 3.6E-02 | joint |
| 10410345 | Zfp748        | 13               | 67602610            | rs29549507        | 2.4                                       | 3.6E-02 | joint |

| Probe ID | Gene Symbol   | SNP Chrom (mm37) | SNP Position (mm37) | Best cis-eQTL SNP | Gene-level P-value (permutation analysis) | Q-value | Type          |
|----------|---------------|------------------|---------------------|-------------------|-------------------------------------------|---------|---------------|
| 10432661 | Galnt6        | 15               | 100539275           | rs32185773        | 2.4                                       | 3.6E-02 | joint         |
| 10504817 | Tgfbr1        | 4                | 47310915            | rs27845062        | 2.4                                       | 3.6E-02 | joint         |
| 10428398 | Eif3e         | 15               | 43077655            | rs31580536        | 2.4                                       | 3.6E-02 | joint         |
| 10460108 | Gnpnat1       | 14               | 45899224            | rs6284094         | 2.4                                       | 3.6E-02 | joint         |
| 10594315 | Fem1b         | 9                | 62226774            | rs30481819        | 2.4                                       | 3.6E-02 | joint         |
| 10508479 | Ptp4a2        | 4                | 129847468           | rs8272673         | 2.4                                       | 3.7E-02 | joint         |
| 10565815 | Gm4980        | 7                | 105859238           | rs31710002        | 2.4                                       | 3.7E-02 | joint         |
| 10560237 | Gpr77         | 7                | 16822056            | rs6348397         | 2.4                                       | 3.7E-02 | joint         |
| 10444312 | Btnl2         | 17               | 33887470            | mm37-17-33887470  | 2.4                                       | 3.7E-02 | joint         |
| 10408200 | Hist1h4f      | 13               | 23495851            | rs6314855         | 2.4                                       | 3.7E-02 | joint         |
| 10585803 | Stra6         | 9                | 58508540            | rs6161783         | 2.4                                       | 3.7E-02 | joint         |
| 10533085 | Pebp1         | 5                | 117930077           | rs13478481        | 2.4                                       | 3.7E-02 | joint         |
| 10389134 | Sfn9          | 11               | 82883421            | rs28191176        | 2.3                                       | 3.7E-02 | joint         |
| 10562578 | Pop4          | 7                | 38996606            | rs31864072        | 2.3                                       | 3.7E-02 | joint         |
| 10433656 | Mkl2          | 16               | 13343475            | rs4163175         | 2.3                                       | 3.7E-02 | joint         |
| 10400293 | 6530401N04Rik | 12               | 52886510            | rs29207736        | 2.3                                       | 3.7E-02 | joint         |
| 10548884 | Erp27         | 6                | 136108417           | rs30574004        | 2.3                                       | 3.7E-02 | joint         |
| 10529895 | Qdpr          | 5                | 46415271            | rs29633750        | 2.3                                       | 3.7E-02 | joint         |
| 10518069 | Efh2          | 4                | 140713786           | rs32671622        | 2.3                                       | 3.7E-02 | joint         |
| 10468795 | Rab11fip2     | 19               | 59979567            | rs30957600        | 2.3                                       | 3.7E-02 | joint         |
| 10399696 | Rnf144a       | 12               | 26670102            | rs33847601        | 2.3                                       | 3.7E-02 | joint         |
| 10356601 | Per2          | 1                | 92601941            | rs6403530         | 2.3                                       | 3.7E-02 | joint         |
| 10586252 | Dennd4a       | 9                | 64888941            | rs6227786         | 2.3                                       | 3.7E-02 | joint         |
| 10572635 | Sfn           | 4                | 132642384           | rs33024223        | 2.3                                       | 3.7E-02 | joint         |
| 10547926 | Cops7a        | 6                | 125061813           | rs30666174        | 2.3                                       | 3.8E-02 | joint         |
| 10526848 | A430033K04Rik | 5                | 138623492           | rs29272224        | 2.3                                       | 3.8E-02 | joint         |
| 10361682 | Ppil4         | 10               | 7511633             | rs13465961        | 2.3                                       | 3.8E-02 | joint         |
| 10390252 | Gm11536       | 11               | 96410911            | rs27074446        | 2.3                                       | 3.8E-02 | joint         |
| 10509838 | Padi2         | 4                | 140346796           | rs28310621        | 2.3                                       | 3.8E-02 | joint         |
| 10552832 | Nosip         | 7                | 52250686            | rs32051036        | 2.3                                       | 3.8E-02 | joint         |
| 10407803 | Gpr137b       | 13               | 12612567            | rs29552398        | 2.3                                       | 3.9E-02 | joint         |
| 10526508 | Fis1          | 5                | 137814352           | rs3150288         | 2.3                                       | 3.9E-02 | joint         |
| 10376292 | Larp1         | 11               | 57471055            | rs29404065        | 2.3                                       | 3.9E-02 | joint         |
| 10476834 | Xrn2          | 2                | 147439021           | rs27283473        | 2.3                                       | 3.9E-02 | joint         |
| 10484999 | Ddb2          | 2                | 90986721            | rs33011122        | 2.3                                       | 3.9E-02 | joint         |
| 10359677 | Blzf1         | 1                | 166113450           | rs31846431        | 2.3                                       | 3.9E-02 | joint         |
| 10592471 | Gramd1b       | 9                | 39499324            | rs30324560        | 2.3                                       | 3.9E-02 | joint         |
| 10391103 | Jup           | 11               | 100860032           | rs29414884        | 2.3                                       | 3.9E-02 | joint         |
| 10556491 | Far1          | 7                | 120138402           | rs6185800         | 4.0                                       | 9.5E-03 | cell_specific |
| 10512005 | 1810030N24Rik | 4                | 34367659            | rs27803758        | 4.0                                       | 9.5E-03 | cell_specific |
| 10545401 | Vamp5         | 6                | 71679431            | rs30681710        | 4.0                                       | 9.5E-03 | cell_specific |
| 10518341 | Ppp2r5a       | 1                | 193083622           | rs30548840        | 4.0                                       | 9.5E-03 | cell_specific |
| 10439881 | 5330426P16Rik | 16               | 50723786            | rs4186115         | 4.0                                       | 9.5E-03 | cell_specific |
| 10390299 | Pnp0          | 11               | 96444238            | rs29434627        | 4.0                                       | 9.5E-03 | cell_specific |
| 10450723 | H2-T10        | 17               | 35845027            | mm37-17-35845027  | 4.0                                       | 9.5E-03 | cell_specific |
| 10579939 | Usp38         | 8                | 83617706            | rs33386427        | 4.0                                       | 9.5E-03 | cell_specific |
| 10519060 | Tnfrsf14      | 4                | 154314843           | rs33115581        | 4.0                                       | 9.5E-03 | cell_specific |
| 10416566 | Epsti1        | 14               | 78095590            | rs30781266        | 4.0                                       | 9.5E-03 | cell_specific |
| 10543471 | Pot1a         | 6                | 25764203            | rs3671709         | 4.0                                       | 9.5E-03 | cell_specific |
| 10477630 | Dynlrb1       | 2                | 155347064           | rs27324153        | 4.0                                       | 9.5E-03 | cell_specific |
| 10553301 | Ldha          | 7                | 53338767            | rs31872006        | 4.0                                       | 9.5E-03 | cell_specific |
| 10550365 | Prkd2         | 7                | 17415743            | rs32516878        | 4.0                                       | 9.5E-03 | cell_specific |
| 10587639 | Nt5e          | 9                | 88236476            | rs30435098        | 4.0                                       | 9.5E-03 | cell_specific |

| Probe ID | Gene Symbol   | SNP Chrom (mm37) | SNP Position (mm37) | Best cis-eQTL SNP | Gene-level P-value (permutation analysis) | Q-value | Type          |
|----------|---------------|------------------|---------------------|-------------------|-------------------------------------------|---------|---------------|
| 10400254 | Heatr5a       | 12               | 52914832            | rs29178695        | 4.0                                       | 9.5E-03 | cell_specific |
| 10346168 | Stat4         | 1                | 52113607            | rs6232649         | 4.0                                       | 9.5E-03 | cell_specific |
| 10461723 | Fam111a       | 19               | 12661130            | rs30614136        | 4.0                                       | 9.5E-03 | cell_specific |
| 10518069 | Efhd2         | 4                | 141079421           | rs27580162        | 4.0                                       | 9.5E-03 | cell_specific |
| 10456492 | D18Ert653e    | 18               | 68368898            | rs30058399        | 4.0                                       | 9.5E-03 | cell_specific |
| 10486469 | Vps39         | 2                | 120697778           | rs27438933        | 4.0                                       | 9.5E-03 | cell_specific |
| 10549361 | Tm7sf3        | 6                | 146606897           | rs3724485         | 4.0                                       | 9.5E-03 | cell_specific |
| 10597627 | Oxsr1         | 9                | 120065853           | rs29831536        | 4.0                                       | 9.5E-03 | cell_specific |
| 10355967 | Ap1s3         | 1                | 79481687            | rs3659983         | 4.0                                       | 9.5E-03 | cell_specific |
| 10547140 | Tmcc1         | 6                | 116153054           | rs30316104        | 4.0                                       | 9.5E-03 | cell_specific |
| 10439936 | Nfkbiz        | 16               | 55739724            | rs4187896         | 4.0                                       | 9.5E-03 | cell_specific |
| 10530151 | Tlr6          | 5                | 65381279            | rs31444941        | 4.0                                       | 9.5E-03 | cell_specific |
| 10575120 | Sntb2         | 8                | 109164175           | rs33180684        | 4.0                                       | 9.5E-03 | cell_specific |
| 10542836 | Klhdc5        | 6                | 147538222           | rs30806561        | 4.0                                       | 9.5E-03 | cell_specific |
| 10456254 | Nedd4l        | 18               | 65094902            | rs29977382        | 4.0                                       | 9.5E-03 | cell_specific |
| 10483381 | Stk39         | 2                | 68139594            | rs33019425        | 4.0                                       | 9.5E-03 | cell_specific |
| 10553336 | Zdhc13        | 7                | 56010213            | rs31326447        | 4.0                                       | 9.5E-03 | cell_specific |
| 10524631 | Oasl1         | 5                | 115004548           | rs29534493        | 4.0                                       | 9.5E-03 | cell_specific |
| 10396694 | Churc1        | 12               | 77781590            | rs29205494        | 4.0                                       | 9.5E-03 | cell_specific |
| 10525452 | Rnf34         | 5                | 123324768           | rs29525600        | 4.0                                       | 9.5E-03 | cell_specific |
| 10575102 | Cirh1a        | 8                | 109264042           | rs32899354        | 4.0                                       | 9.5E-03 | cell_specific |
| 10516823 | Epb4.1        | 4                | 132229102           | rs27593908        | 4.0                                       | 9.5E-03 | cell_specific |
| 10512774 | Coro2a        | 4                | 46980565            | rs27821784        | 4.0                                       | 9.5E-03 | cell_specific |
| 10526520 | Plod3         | 5                | 137814352           | rs3150288         | 4.0                                       | 9.5E-03 | cell_specific |
| 10430519 | Csnk1e        | 15               | 79294488            | rs3678019         | 4.0                                       | 9.5E-03 | cell_specific |
| 10577190 | Rasa3         | 8                | 13605017            | rs6281754         | 4.0                                       | 9.5E-03 | cell_specific |
| 10387536 | Cd68          | 11               | 70469788            | rs29431005        | 4.0                                       | 9.5E-03 | cell_specific |
| 10424676 | Ly6e          | 15               | 75144538            | rs31727411        | 4.0                                       | 9.5E-03 | cell_specific |
| 10551542 | Fbxo17        | 7                | 29482328            | rs31576129        | 4.0                                       | 9.5E-03 | cell_specific |
| 10358717 | 1700025G04Rik | 1                | 154689249           | rs6233546         | 4.0                                       | 9.5E-03 | cell_specific |
| 10420785 | Mtmr9         | 14               | 64848723            | rs31448986        | 4.0                                       | 9.5E-03 | cell_specific |
| 10466888 | Glis3         | 19               | 28608123            | rs30302551        | 4.0                                       | 9.5E-03 | cell_specific |
| 10510452 | Dffa          | 4                | 148223345           | rs3681476         | 4.0                                       | 9.5E-03 | cell_specific |
| 10532753 | Coro1c        | 5                | 114354945           | rs33661898        | 4.0                                       | 9.5E-03 | cell_specific |
| 10429573 | Ly6c2         | 15               | 74732982            | rs32479616        | 4.0                                       | 9.5E-03 | cell_specific |
| 10542275 | Etv6          | 6                | 133828659           | rs30018326        | 4.0                                       | 9.5E-03 | cell_specific |
| 10549162 | St8sia1       | 6                | 143094081           | rs6368858         | 4.0                                       | 9.5E-03 | cell_specific |
| 10510162 | Ppp2r5a       | 1                | 193083622           | rs30548840        | 4.0                                       | 9.5E-03 | cell_specific |
| 10574166 | Cpne2         | 8                | 97095919            | rs32098937        | 4.0                                       | 9.5E-03 | cell_specific |
| 10405757 | 2010111i01Rik | 13               | 63058762            | rs29584536        | 4.0                                       | 9.5E-03 | cell_specific |
| 10367717 | BC013529      | 10               | 7464266             | rs29326767        | 4.0                                       | 9.5E-03 | cell_specific |
| 10425302 | Gtppb1        | 15               | 79294488            | rs3678019         | 4.0                                       | 9.5E-03 | cell_specific |
| 10377804 | Arrb2         | 11               | 70750141            | rs29485948        | 4.0                                       | 9.5E-03 | cell_specific |
| 10361104 | Ppp2r5a       | 1                | 193105469           | rs31308448        | 4.0                                       | 9.5E-03 | cell_specific |
| 10464128 | Casp7         | 19               | 56466207            | rs30353487        | 4.0                                       | 9.5E-03 | cell_specific |
| 10459925 | Pqlc1         | 18               | 80683000            | rs29623552        | 4.0                                       | 9.5E-03 | cell_specific |
| 10550332 | Slc1a5        | 7                | 17415743            | rs32516878        | 4.0                                       | 9.5E-03 | cell_specific |
| 10472738 | Dcaf17        | 2                | 70937816            | rs27971741        | 4.0                                       | 9.5E-03 | cell_specific |
| 10348537 | Ramp1         | 1                | 93001662            | rs30696327        | 4.0                                       | 9.5E-03 | cell_specific |
| 10547100 | Plxnd1        | 6                | 116240441           | rs30317040        | 4.0                                       | 9.5E-03 | cell_specific |
| 10427928 | Trio          | 15               | 27768363            | rs31749825        | 4.0                                       | 9.5E-03 | cell_specific |
| 10365601 | Gnptab        | 10               | 87921997            | rs29316311        | 4.0                                       | 9.5E-03 | cell_specific |
| 10381172 | Stat5a        | 11               | 101697945           | rs28234687        | 4.0                                       | 9.5E-03 | cell_specific |
| 10429568 | Ly6c1         | 15               | 74732982            | rs32479616        | 4.0                                       | 9.5E-03 | cell_specific |
| 10524955 | Tesc          | 5                | 118241727           | rs29675645        | 4.0                                       | 9.5E-03 | cell_specific |



| Probe ID | Gene Symbol   | SNP Chrom (mm37) | SNP Position (mm37) | Best cis-eQTL SNP | Gene-level P-value (permutation analysis) | Q-value | Type          |
|----------|---------------|------------------|---------------------|-------------------|-------------------------------------------|---------|---------------|
| 10493703 | Jtb           | 3                | 89500015            | rs31437137        | 4.0                                       | 9.5E-03 | cell_specific |
| 10421810 | 1190002H23Rik | 14               | 79714035            | rs6200299         | 4.0                                       | 9.5E-03 | cell_specific |
| 10454198 | Rnf125        | 18               | 21090989            | rs29579479        | 4.0                                       | 9.5E-03 | cell_specific |
| 10412830 | Ngly1         | 14               | 16192800            | rs30486858        | 4.0                                       | 9.5E-03 | cell_specific |
| 10407370 | 4833420G17Rik | 13               | 120139786           | rs30094125        | 4.0                                       | 9.5E-03 | cell_specific |
| 10510197 | Ppp2r5a       | 1                | 193083622           | rs30548840        | 4.0                                       | 9.5E-03 | cell_specific |
| 10546294 | Nup210        | 6                | 90957129            | rs30558656        | 4.0                                       | 9.5E-03 | cell_specific |
| 10457054 | Zadh2         | 18               | 84292211            | rs30065972        | 4.0                                       | 9.5E-03 | cell_specific |
| 10455472 | Dcp2          | 18               | 44203666            | rs29624632        | 4.0                                       | 9.5E-03 | cell_specific |
| 10350823 | Abl2          | 1                | 158427217           | rs30707627        | 4.0                                       | 9.5E-03 | cell_specific |
| 10353181 | Lactb2        | 1                | 14206837            | rs31958571        | 4.0                                       | 9.5E-03 | cell_specific |
| 10436830 | lfnar2        | 16               | 91420154            | rs4219074         | 4.0                                       | 9.5E-03 | cell_specific |
| 10441055 | Pigp          | 16               | 94603265            | rs3721009         | 4.0                                       | 9.5E-03 | cell_specific |
| 10477808 | Romo1         | 2                | 154970119           | rs27326123        | 4.0                                       | 9.5E-03 | cell_specific |
| 10495252 | Romo1         | 2                | 154970119           | rs27326123        | 4.0                                       | 9.5E-03 | cell_specific |
| 10380751 | Mrp45         | 11               | 96832611            | rs29446248        | 4.0                                       | 9.5E-03 | cell_specific |
| 10447294 | Prkce         | 17               | 86686130            | rs33242653        | 4.0                                       | 9.5E-03 | cell_specific |
| 10409767 | Golm1         | 13               | 59400001            | rs29784760        | 4.0                                       | 9.5E-03 | cell_specific |
| 10406598 | Serinc5       | 13               | 93442535            | rs29251705        | 4.0                                       | 9.5E-03 | cell_specific |
| 10405693 | Dapk1         | 13               | 61666712            | rs3718662         | 4.0                                       | 9.5E-03 | cell_specific |
| 10405263 | 4732471D19Rik | 13               | 54513686            | rs29850204        | 4.0                                       | 9.5E-03 | cell_specific |
| 10462603 | Fas           | 19               | 34330781            | rs31034447        | 4.0                                       | 9.5E-03 | cell_specific |
| 10423593 | Laptm4b       | 15               | 34344001            | rs31851117        | 4.0                                       | 9.5E-03 | cell_specific |
| 10501048 | 2010016118Rik | 3                | 106978693           | rs30254304        | 4.0                                       | 9.5E-03 | cell_specific |
| 10475532 | Sqrdl         | 2                | 122549260           | rs3726940         | 3.7                                       | 1.4E-02 | cell_specific |
| 10577954 | Rab11fip1     | 8                | 27979203            | rs33034750        | 3.7                                       | 1.4E-02 | cell_specific |
| 10350977 | 4930523C07Rik | 1                | 161122172           | rs3719736         | 3.7                                       | 1.4E-02 | cell_specific |
| 10521440 | Afap1         | 5                | 36436857            | rs32582241        | 3.7                                       | 1.4E-02 | cell_specific |
| 10502299 | Nfkb1         | 3                | 135803380           | rs30938743        | 3.7                                       | 1.4E-02 | cell_specific |
| 10416371 | Lpar6         | 14               | 73599680            | rs30500077        | 3.7                                       | 1.4E-02 | cell_specific |
| 10437664 | Dexi          | 16               | 10530544            | rs4160897         | 3.7                                       | 1.4E-02 | cell_specific |
| 10503359 | C430048L16Rik | 4                | 12266574            | rs32191648        | 3.7                                       | 1.4E-02 | cell_specific |
| 10350753 | Glul          | 1                | 155614341           | rs32575836        | 3.7                                       | 1.4E-02 | cell_specific |
| 10450075 | H2-K1         | 17               | 33948803            | mm37-17-33948803  | 3.7                                       | 1.4E-02 | cell_specific |
| 10376269 | Galnt10       | 11               | 57194384            | rs6235463         | 3.7                                       | 1.4E-02 | cell_specific |
| 10459912 | Adnp2         | 18               | 81219995            | rs29721638        | 3.7                                       | 1.4E-02 | cell_specific |
| 10547521 | Atp6v1e1      | 6                | 121290936           | rs30659335        | 3.7                                       | 1.4E-02 | cell_specific |
| 10424810 | Gpaa1         | 15               | 75609284            | rs6268783         | 3.7                                       | 1.4E-02 | cell_specific |
| 10563323 | Nucb1         | 7                | 52760213            | rs32277913        | 3.7                                       | 1.4E-02 | cell_specific |
| 10524004 | Pcgf3         | 5                | 108241665           | rs3718575         | 3.7                                       | 1.4E-02 | cell_specific |
| 10531952 | Abcg3         | 5                | 104934161           | rs33625455        | 3.7                                       | 1.4E-02 | cell_specific |
| 10563085 | Fcgrt         | 7                | 52238853            | rs32431972        | 3.7                                       | 1.4E-02 | cell_specific |
| 10416256 | Bin3          | 14               | 70643331            | rs6185468         | 3.7                                       | 1.4E-02 | cell_specific |
| 10554269 | Abhd2         | 7                | 86363783            | rs31691621        | 3.7                                       | 1.4E-02 | cell_specific |
| 10393728 | Slc38a10      | 11               | 119986865           | rs27013742        | 3.7                                       | 1.4E-02 | cell_specific |
| 10353167 | Tram1         | 1                | 14206837            | rs31958571        | 3.7                                       | 1.4E-02 | cell_specific |
| 10505008 | Slc44a1       | 4                | 52502522            | rs32306828        | 3.7                                       | 1.4E-02 | cell_specific |
| 10505028 | Slc44a1       | 4                | 52502522            | rs32306828        | 3.7                                       | 1.4E-02 | cell_specific |
| 10464153 | Nhlrc2        | 19               | 56663472            | rs45997356        | 3.7                                       | 1.4E-02 | cell_specific |
| 10396278 | Daam1         | 12               | 72977231            | rs29218894        | 3.7                                       | 1.4E-02 | cell_specific |
| 10378126 | Ankfy1        | 11               | 72784506            | rs26917883        | 3.7                                       | 1.4E-02 | cell_specific |
| 10382376 | Ttyh2         | 11               | 114383904           | rs27000532        | 3.7                                       | 1.4E-02 | cell_specific |
| 10556302 | Ampd3         | 7                | 118046667           | rs32256235        | 3.7                                       | 1.4E-02 | cell_specific |
| 10358389 | Rgs2          | 1                | 145391712           | rs32473980        | 3.7                                       | 1.4E-02 | cell_specific |

| Probe ID | Gene Symbol   | SNP Chrom (mm37) | SNP Position (mm37) | Best cis-eQTL SNP | Gene-level P-value (permutation analysis) | Q-value | Type          |
|----------|---------------|------------------|---------------------|-------------------|-------------------------------------------|---------|---------------|
| 10474006 | Phf21a        | 2                | 92156887            | rs27384975        | 3.7                                       | 1.4E-02 | cell_specific |
| 10528702 | Prkag2        | 5                | 24469448            | rs3705744         | 3.7                                       | 1.4E-02 | cell_specific |
| 10508936 | Ubxn11        | 4                | 134026748           | rs27547258        | 3.7                                       | 1.4E-02 | cell_specific |
| 10466925 | Ak3           | 19               | 29225389            | rs6366840         | 3.7                                       | 1.4E-02 | cell_specific |
| 10555681 | Stim1         | 7                | 109583353           | rs32441811        | 3.7                                       | 1.4E-02 | cell_specific |
| 10450212 | Egfl8         | 17               | 34458128            | mm37-17-34458128  | 3.5                                       | 1.8E-02 | cell_specific |
| 10375941 | Vdac1         | 11               | 52259306            | rs29402985        | 3.5                                       | 1.8E-02 | cell_specific |
| 10430770 | Tob2          | 15               | 82396168            | rs6362314         | 3.5                                       | 1.8E-02 | cell_specific |
| 10531529 | Cnot6l        | 5                | 96265618            | rs33565440        | 3.5                                       | 1.8E-02 | cell_specific |
| 10361620 | Rmnd1         | 10               | 5898253             | mm37-10-5898253   | 3.5                                       | 1.8E-02 | cell_specific |
| 10383235 | A730011L01Rik | 11               | 120030657           | rs29474012        | 3.5                                       | 1.8E-02 | cell_specific |
| 10493711 | Crtc2         | 3                | 89435945            | rs31244910        | 3.5                                       | 1.8E-02 | cell_specific |
| 10513268 | Al314180      | 4                | 58831823            | rs6333919         | 3.5                                       | 1.8E-02 | cell_specific |
| 10487359 | Itprlp1       | 2                | 127108723           | rs33098756        | 3.5                                       | 1.8E-02 | cell_specific |
| 10560015 | Rnf141        | 7                | 117852909           | rs31752672        | 3.5                                       | 1.8E-02 | cell_specific |
| 10507908 | Fhl3          | 4                | 124311705           | rs32174150        | 3.5                                       | 1.8E-02 | cell_specific |
| 10509868 | Atp13a2       | 4                | 140647159           | rs27588207        | 3.5                                       | 1.8E-02 | cell_specific |
| 10477649 | Accs2         | 2                | 156129718           | rs27355705        | 3.5                                       | 1.8E-02 | cell_specific |
| 10481155 | Rexo4         | 2                | 27703108            | rs33304781        | 3.5                                       | 1.8E-02 | cell_specific |
| 10399061 | Esyt2         | 12               | 117464677           | rs6214666         | 3.5                                       | 1.8E-02 | cell_specific |
| 10457071 | Cyb5          | 18               | 85447043            | rs29679137        | 3.5                                       | 1.8E-02 | cell_specific |
| 10506870 | Txndc12       | 4                | 107720590           | rs33011000        | 3.5                                       | 1.8E-02 | cell_specific |
| 10367775 | Stxbp5        | 10               | 9625228             | rs29364104        | 3.5                                       | 1.8E-02 | cell_specific |
| 10478778 | Arfgef2       | 2                | 166493958           | rs27313367        | 3.4                                       | 2.2E-02 | cell_specific |
| 10420787 | Mtmr9         | 14               | 64174110            | rs30932330        | 3.4                                       | 2.2E-02 | cell_specific |
| 10344805 | Cspp1         | 1                | 10247169            | rs31048766        | 3.4                                       | 2.2E-02 | cell_specific |
| 10525893 | Aacs          | 5                | 126184432           | rs33584144        | 3.4                                       | 2.2E-02 | cell_specific |
| 10444439 | Atf6b         | 17               | 33841940            | mm37-17-33841940  | 3.4                                       | 2.2E-02 | cell_specific |
| 10389087 | Rffl          | 11               | 82765715            | rs29432702        | 3.4                                       | 2.2E-02 | cell_specific |
| 10385903 | Pdlim4        | 11               | 53930025            | rs29416948        | 3.4                                       | 2.2E-02 | cell_specific |
| 10572613 | Mrp134        | 8                | 73921071            | rs32801300        | 3.4                                       | 2.2E-02 | cell_specific |
| 10550509 | Pglyrp1       | 7                | 18888237            | rs31948487        | 3.4                                       | 2.2E-02 | cell_specific |
| 10533285 | Ptpn11        | 5                | 121690075           | rs32188639        | 3.4                                       | 2.2E-02 | cell_specific |
| 10566580 | Gm4759        | 7                | 114243647           | rs31583245        | 3.4                                       | 2.2E-02 | cell_specific |
| 10555510 | Pde2a         | 7                | 107768298           | rs31749119        | 3.4                                       | 2.2E-02 | cell_specific |
| 10534990 | Taf6          | 5                | 139065952           | rs3687900         | 3.4                                       | 2.2E-02 | cell_specific |
| 10571274 | Gsr           | 8                | 34902206            | rs32869686        | 3.4                                       | 2.2E-02 | cell_specific |
| 10508992 | Paqr7         | 4                | 134047858           | rs27547127        | 3.4                                       | 2.2E-02 | cell_specific |
| 10374453 | Glul          | 1                | 155614341           | rs32575836        | 3.3                                       | 2.6E-02 | cell_specific |
| 10400718 | Sos2          | 12               | 71269636            | rs29131427        | 3.3                                       | 2.6E-02 | cell_specific |
| 10552210 | Ankrd27       | 7                | 36114899            | rs31949195        | 3.3                                       | 2.6E-02 | cell_specific |
| 10503845 | Ube2j1        | 4                | 33149029            | rs32496044        | 3.3                                       | 2.6E-02 | cell_specific |
| 10477739 | Cep250        | 2                | 156229727           | rs27336792        | 3.3                                       | 2.6E-02 | cell_specific |
| 10562368 | 4931406P16Rik | 7                | 35399026            | rs31939964        | 3.3                                       | 2.6E-02 | cell_specific |
| 10450675 | H2-T24        | 17               | 36637612            | mm37-17-36637612  | 3.3                                       | 2.6E-02 | cell_specific |
| 10372844 | Rassf3        | 10               | 121077730           | rs29327803        | 3.3                                       | 2.6E-02 | cell_specific |
| 10517373 | Rcan3         | 4                | 134669683           | rs28335132        | 3.3                                       | 2.6E-02 | cell_specific |
| 10423663 | Vps13b        | 15               | 35755924            | rs32146548        | 3.3                                       | 2.6E-02 | cell_specific |
| 10504865 | Invs          | 4                | 48067605            | rs6175060         | 3.3                                       | 2.6E-02 | cell_specific |
| 10454953 | Tmco6         | 18               | 36663058            | rs13483301        | 3.3                                       | 2.6E-02 | cell_specific |

| Probe ID | Gene Symbol   | SNP Chrom (mm37) | SNP Position (mm37) | Best cis-eQTL SNP | Gene-level P-value (permutation analysis) | Q-value | Type          |
|----------|---------------|------------------|---------------------|-------------------|-------------------------------------------|---------|---------------|
| 10444895 | Flot1         | 17               | 36637612            | mm37-17-36637612  | 3.2                                       | 2.9E-02 | cell_specific |
| 10412100 | Map3k1        | 13               | 112607087           | rs29808239        | 3.2                                       | 2.9E-02 | cell_specific |
| 10417749 | Ube2e1        | 14               | 18208863            | rs30662759        | 3.2                                       | 2.9E-02 | cell_specific |
| 10429564 | Ly6a          | 15               | 74732872            | rs32073945        | 3.2                                       | 2.9E-02 | cell_specific |
| 10535532 | Tecpr1        | 5                | 144909341           | rs32344365        | 3.2                                       | 2.9E-02 | cell_specific |
| 10597461 | Cmtm7         | 9                | 114707961           | rs33634484        | 3.2                                       | 2.9E-02 | cell_specific |
| 10546184 | Plxna1        | 6                | 89271761            | rs30475892        | 3.2                                       | 2.9E-02 | cell_specific |
| 10587854 | Slc9a9        | 9                | 93753044            | rs6339312         | 3.2                                       | 2.9E-02 | cell_specific |
| 10540059 | Slc41a3       | 6                | 89655066            | mm37-6-89655066   | 3.2                                       | 2.9E-02 | cell_specific |
| 10518570 | Pgd           | 4                | 148522558           | rs31807748        | 3.2                                       | 2.9E-02 | cell_specific |
| 10453678 | Zeb1          | 18               | 5370959             | rs29555170        | 3.2                                       | 2.9E-02 | cell_specific |
| 10421526 | Rb1           | 14               | 73447674            | rs30698679        | 3.1                                       | 3.2E-02 | cell_specific |
| 10579406 | Arrdc2        | 8                | 72463828            | rs32629017        | 3.1                                       | 3.2E-02 | cell_specific |
| 10412177 | Skiv2l2       | 13               | 112869620           | rs29241052        | 3.1                                       | 3.2E-02 | cell_specific |
| 10376755 | Tnfrsf13b     | 11               | 59986632            | rs29467518        | 3.1                                       | 3.2E-02 | cell_specific |
| 10421723 | Dnajc15       | 14               | 78095590            | rs30781266        | 3.1                                       | 3.2E-02 | cell_specific |
| 10348321 | Dgkd          | 1                | 89797190            | rs32265267        | 3.1                                       | 3.2E-02 | cell_specific |
| 10530215 | 1110003E01Rik | 5                | 65381279            | rs31444941        | 3.1                                       | 3.2E-02 | cell_specific |
| 10406530 | Tmem167       | 13               | 89616620            | rs29570900        | 3.1                                       | 3.2E-02 | cell_specific |
| 10494978 | Ptpn22        | 3                | 103703663           | rs30848500        | 3.1                                       | 3.2E-02 | cell_specific |
| 10566050 | Il18bp        | 7                | 108176270           | rs6344633         | 3.1                                       | 3.2E-02 | cell_specific |
| 10577230 | Erich1        | 8                | 14430267            | rs6280829         | 3.1                                       | 3.4E-02 | cell_specific |
| 10356475 | Arl4c         | 1                | 90674018            | rs31843138        | 3.1                                       | 3.4E-02 | cell_specific |
| 10350003 | Cyb5r1        | 1                | 136255800           | rs3658008         | 3.1                                       | 3.4E-02 | cell_specific |
| 10433735 | Abcc1         | 16               | 13644224            | rs4163486         | 3.1                                       | 3.4E-02 | cell_specific |
| 10344809 | Cssp1         | 1                | 10247169            | rs31048766        | 3.1                                       | 3.4E-02 | cell_specific |
| 10502469 | Pdlim5        | 3                | 142648418           | rs31101595        | 3.1                                       | 3.4E-02 | cell_specific |
| 10386723 | Mapk7         | 11               | 62027215            | rs29480195        | 3.1                                       | 3.4E-02 | cell_specific |
| 10450226 | Ppt2          | 17               | 33841940            | mm37-17-33841940  | 3.1                                       | 3.4E-02 | cell_specific |
| 10391207 | Dhx58         | 11               | 100293380           | rs29451902        | 3.1                                       | 3.4E-02 | cell_specific |
| 10476349 | 1110034G24Rik | 2                | 133015586           | rs28288156        | 3.1                                       | 3.4E-02 | cell_specific |
| 10353032 | Rpa3          | 6                | 8456075             | rs30173138        | 3.1                                       | 3.4E-02 | cell_specific |
| 10352459 | Rab3gap2      | 1                | 186861978           | rs6231754         | 3.1                                       | 3.4E-02 | cell_specific |
| 10569545 | Nadsyn1       | 7                | 150565771           | rs6307236         | 3.1                                       | 3.4E-02 | cell_specific |
| 10359034 | Qsox1         | 1                | 158533664           | rs6185284         | 3.1                                       | 3.4E-02 | cell_specific |
| 10546113 | Sec61a1       | 6                | 89186890            | rs30413806        | 3.0                                       | 3.7E-02 | cell_specific |
| 10562260 | Gramd1a       | 7                | 31601749            | rs31424765        | 3.0                                       | 3.7E-02 | cell_specific |
| 10566668 | Socs6         | 18               | 88965286            | rs30256508        | 3.0                                       | 3.7E-02 | cell_specific |
| 10493292 | 2810403A07Rik | 3                | 88419784            | rs31087596        | 3.0                                       | 3.7E-02 | cell_specific |
| 10553080 | Car11         | 7                | 52898483            | rs32222012        | 3.0                                       | 3.7E-02 | cell_specific |
| 10415778 | Arl11         | 14               | 62106069            | rs31516577        | 3.0                                       | 3.7E-02 | cell_specific |
| 10376568 | Rai1          | 11               | 60811053            | rs29390814        | 3.0                                       | 3.7E-02 | cell_specific |
| 10485405 | Cd44          | 2                | 103260253           | rs3726330         | 3.0                                       | 3.7E-02 | cell_specific |
| 10523647 | Aff1          | 5                | 103823179           | rs29674095        | 3.0                                       | 4.0E-02 | cell_specific |
| 10514133 | Ttc39b        | 4                | 83360150            | rs28103847        | 3.0                                       | 4.0E-02 | cell_specific |
| 10592535 | Sorl1         | 9                | 41300061            | rs29976434        | 3.0                                       | 4.0E-02 | cell_specific |
| 10488237 | Snx5          | 2                | 143830449           | rs33148264        | 3.0                                       | 4.0E-02 | cell_specific |
| 10475941 | Zc3h6         | 2                | 127962561           | rs27432128        | 3.0                                       | 4.0E-02 | cell_specific |
| 10405545 | Pcbd2         | 13               | 56035920            | rs30100717        | 3.0                                       | 4.0E-02 | cell_specific |
| 10469559 | Msrb2         | 2                | 19175977            | rs27153219        | 3.0                                       | 4.0E-02 | cell_specific |
| 10512655 | Rnf38         | 4                | 43994971            | rs27826309        | 2.9                                       | 4.3E-02 | cell_specific |
| 10407570 | Zmynd11       | 13               | 9951889             | rs6333172         | 2.9                                       | 4.3E-02 | cell_specific |

| Probe ID | Gene Symbol | SNP Chrom (mm37) | SNP Position (mm37) | Best cis-eQTL SNP | Gene-level P-value (permutation analysis) | Q-value | Type          |
|----------|-------------|------------------|---------------------|-------------------|-------------------------------------------|---------|---------------|
| 10574204 | Arl2bp      | 8                | 97095919            | rs32098937        | 2.9                                       | 4.3E-02 | cell_specific |
| 10391378 | Ezh1        | 11               | 101570128           | rs29467997        | 2.9                                       | 4.3E-02 | cell_specific |
| 10539135 | Capg        | 6                | 71730411            | rs30376556        | 2.9                                       | 4.3E-02 | cell_specific |
| 10436694 | Rplp0       | 5                | 115834070           | rs29733302        | 2.9                                       | 4.3E-02 | cell_specific |
| 10535477 | Usp42       | 5                | 143694157           | rs33060114        | 2.9                                       | 4.5E-02 | cell_specific |
| 10509168 | E2f2        | 4                | 136101179           | rs32603084        | 2.9                                       | 4.5E-02 | cell_specific |
| 10445442 | Gtpbp2      | 17               | 46725237            | rs33648198        | 2.9                                       | 4.5E-02 | cell_specific |
| 10368227 | Ube2q2      | 9                | 54936087            | rs6334610         | 2.9                                       | 4.5E-02 | cell_specific |
| 10535759 | Lnx2        | 5                | 147886810           | rs32380998        | 2.9                                       | 4.5E-02 | cell_specific |
| 10497920 | Ankrd50     | 3                | 38688632            | rs31426507        | 2.9                                       | 4.5E-02 | cell_specific |
| 10477897 | Dlgap4      | 2                | 156470023           | rs27339352        | 2.9                                       | 4.8E-02 | cell_specific |
| 10390271 | Nfe2l1      | 11               | 96484370            | rs27056717        | 2.9                                       | 4.8E-02 | cell_specific |
| 10585494 | Ube2q2      | 9                | 54936087            | rs6334610         | 2.9                                       | 4.8E-02 | cell_specific |
| 10585860 | Adpgk       | 9                | 59930483            | rs6395987         | 2.9                                       | 4.8E-02 | cell_specific |
| 10407222 | Dhx29       | 13               | 112869620           | rs29241052        | 2.9                                       | 4.8E-02 | cell_specific |
| 10486119 | Plcb2       | 2                | 118657942           | rs27440200        | 2.9                                       | 4.8E-02 | cell_specific |
| 10439005 | Ppp1r2      | 16               | 32038501            | rs4169852         | 2.9                                       | 4.8E-02 | cell_specific |

**Table S2. The predicted regulatory links inferred by using expression data from T4 and GN cells (see Methods, joint T4\_GN network).**

| TF     | Enriched for Ontogenet targets | Targets                                                                                                                                                                                                                                                                                                                                                                                                                                                                                                                             |
|--------|--------------------------------|-------------------------------------------------------------------------------------------------------------------------------------------------------------------------------------------------------------------------------------------------------------------------------------------------------------------------------------------------------------------------------------------------------------------------------------------------------------------------------------------------------------------------------------|
| Aebp2  | NaN                            | Abl2,Cog5,Glis3,Mpp6,Vps13a,Xrn2,                                                                                                                                                                                                                                                                                                                                                                                                                                                                                                   |
| Arid3b | NaN                            | Aoc2,Ccdc84,Dqx1,Iffo1,Ill18bp,Klf11,Pcnxl3,Per2,Plekhg2,Ppm1b,Spg11,Tcirg1,Ttll3,                                                                                                                                                                                                                                                                                                                                                                                                                                                  |
| Arid4b | NaN                            | A830080D01Rik,Akap9,Ankrd12,Atp11b,Atp2b1,Atrx,Bod1l,C430048L16Rik,Capn7,Ccdc124,Ccpg1,Cdadcl1,Chm,Cspp1,Enox2,Fam134b,Fbxl5,Ggps1,H2afx,Hn1,Ill1rap,Ilf2,Kras,L3mbtl3,Lcorl,Mier3,Morf4l1,Mysm1,Ngly1,Pdha1,Phf14,Pppde1,Prei4,Pspc1,Rfx2,Rnf115,Rpl37a,Rps19,Rsrc2,Samd8,Ssbp4,St8sia4,Stard10,Taok1,Tgfb1,Tmem63a,Top2b,Usp15,Usp53,Wdr20a,Zdhhc20,Zfp518,                                                                                                                                                                       |
| Arid5b | NaN                            | 5830417110Rik,Acadm,B4galt5,Cdk5rap2,Dap,Dhrs7,Dock9,Dok2,Gm13819,Ldlrap1,St3gal1,Tmem8,Wdr46,                                                                                                                                                                                                                                                                                                                                                                                                                                      |
| Asf1b  | fine_module_55                 | 0610010K14Rik,2310022A10Rik,2310061C15Rik,Aaas,Alg3,Atl2,Bub3,C230052I12Rik,Cbx3,Cbx5,Ccdc101,Ccnb2,Cdc20,Cks1b,Cks2,Csrp1,D2Ert750e,Dbf4,Ddx11,Fancg,H2afx,Hdgf,Hint1,Hist1h2af,Hist1h2ak,Hist1h2ao,Hist1h2bb,Hist1h2bc,Hist1h4d,Hist2h4,Kpna2,LOC675534,Mcm2,Mcm5,Mcm7,Mrpl51,Mthfd2,Napa,Ncapd2,Nde1,Nudc,Nup35,Pcna,Polh,Pols,Pomt1,Ppia,Pppde2,Prim2,Psmc3,RP23-38E20.1,Rab18,Rangap1,Rfc4,Rpa3,Rrm1,Sec23b,Setdb1,Slc3a2,Slnf3,Smc2,St3gal4,Stip1,Stmn1,Taf6,Tagln2,Tcf19,Tuba1b,Tuba1c,Tubg1,Ubash3a,Usp39,Vars,Wdr61,I7Rn6, |
| Ash1l  | NaN                            | 1700081L11Rik,1700094D03Rik,Apc,Atp5e,Atp5o,B430203M17Rik,C030046E11Rik,C430014K11Rik,Cd200r1,Cox7a2l,D10Ert750e,D930015E06Rik,Dera,Dmxl1,Dpp3,Etfb,Fryl,G6pc3,Gm7075,Insr,Itga4,Kidins220,LOC100044428,Luc7l2,Mga,Mycbp2,N4bp2l2,Nbeal1,Nipbl,Pgp,Phip,Pptc7,Prr8,Rev3l,Rpl19,Rufy2,Slc7a5,Snora62,Sra1,Ssfa2,Tnks,Tnrc6a,Trappc2l,Utrn,Whsc1l1,Zmynd11,                                                                                                                                                                           |
| Ash2l  | NaN                            | Anapc4,Cdca7l,Cdk4,D10Wsu52e,D2Ert750e,Eif3b,Gart,Ggps1,Gpd1l,Ilf2,Itgb1,Itpril1,Lair1,M6pr,Ncrna00117,Pdlim7,Plscr3,Pygb,Rasgrp4,Rbm3,Rpia,Rrm1,Rrp1,Snapi,Sod2,Sqle,Sumo3,Tm7sf3,Ube1l,Ufm1,                                                                                                                                                                                                                                                                                                                                      |
| Atad2  | NaN                            | 2410129H14Rik,2610039C10Rik,B4galnt1,Bicd2,Cep57,Cradd,Dera,Dynll2,Dzip3,Elovl5,Fam3c,Fbxo22,G2e3,G3bp1,Gm6041,Hsp90b1,Ikbke,Immt,Lcmt1,Letm2,Ltv1,Map3k4,Mcph1,Mrpl15,Mrpl18,Myb,Nup155,Parp2,Pdp1,Pds5b,Rab28,Rexo4,Sgpp1,Smc2,Smc4,Srrt,Stt3b,Topbp1,Trim37,Vaultrc5,Zfp568,                                                                                                                                                                                                                                                     |
| Atf2   | NaN                            | 4930519P11Rik,A530054K11Rik,Cnot4,Dclre1c,Dennd4a,ENSMUSG00000074747,Eif4ebp3,Fbxo46,Gm10158,Gnrh1,Impact,Irgc1,Klf7,Klhl7,Lpp,Lrrc57,Lrrfp2,Mef2a,Mgat4a,N4bp2,Pdlim5,Pign,Qk,Rfx3,Rnasel,Rnf13,Rnpc3,Rpl5,Sdccag8,Slc38a9,Snord33,Snord35a,Ulk2,Uxt,Vps37a,Vrk2,Ywhag,Zcchc7,Zfp68,Zfp715,Zhx1,Zranb1,                                                                                                                                                                                                                            |
| Atf6   | NaN                            | Bmp2k,Polr1a,                                                                                                                                                                                                                                                                                                                                                                                                                                                                                                                       |
| Atf6b  | NaN                            | 0610031J06Rik,0910001L09Rik,2410002I01Rik,4930471M23Rik,4930519P11Rik,5430437P03Rik,Abi3,Agpat1,Ap2s1,Aph1a,Atox1,Bri3bp,Chpf2,Ctdsp2,Dpm2,Dullard,Dyrk1b,Emp3,Fbxl6,Fis1,Fkbp1,Gngt2,Gpaa1,Gramd1a,Isyna1,Llgl1,Lrp10,Man2b2,Mov10,Mrpl4,Ndufa2,Nkiras2,Pcnxl3,Pigq,Ppt2,Rnf187,Shkbp1,Sirt2,Slc25a1,Slc35c2,Slc35e1,Slc39a3,Slc48a1,Tcfe2a,Tmem120a,Trpv2,Wbp1,Zfp358,                                                                                                                                                            |
| Atf7   | NaN                            | 2610110G12Rik,Aagab,Adamts10,Arhgef1,Arid3b,Atp13a1,BC031181,BC037034,BC037112,BC056474,C030016D13Rik,Chkb,Cic,Clcn6,Dcaf15,Depdc5,Dstyk,Fbl,Flt3l,Gabbr1,Lass2,Leng8,Mapk8ip3,Mbd6,Mll1,Ncln,Nf2,Nfrkb,Nisch,Nktr,Npm3,Paad5,Pex1,Pias3,Pigv,Polg2,Pou2f1,Runx1,Slc17a9,Slc35b3,Slc36a1,Srcap,Tecr,Tmem86b,Tpcn2,Whamm,Zfat,Zfp512,Zxdb,                                                                                                                                                                                           |

| TF     | Enriched for Ontogenet targets | Targets                                                                                                                                                                                                                                                                                                                                                                                                                                                                                                                                                                                                                                                                                                                                                                                                                                                        |
|--------|--------------------------------|----------------------------------------------------------------------------------------------------------------------------------------------------------------------------------------------------------------------------------------------------------------------------------------------------------------------------------------------------------------------------------------------------------------------------------------------------------------------------------------------------------------------------------------------------------------------------------------------------------------------------------------------------------------------------------------------------------------------------------------------------------------------------------------------------------------------------------------------------------------|
| Atf7ip | NaN                            | Cwc22,Daglb,EG665955,Hps5,lfit2,LOC100043377,Malt1,Mpzl3,Oas3,Pde2a,Plod1,Rps6ka5,                                                                                                                                                                                                                                                                                                                                                                                                                                                                                                                                                                                                                                                                                                                                                                             |
| Bag1   | NaN                            | 0610009B22Rik,1110012L19Rik,1110057K04Rik,2010109K11Rik,2700060E02Rik,2810416G20Rik,2900064A13Rik,9630058J23Rik,Acot13,Adh5,Agpat5,Ahcy12,Ankrd13a,Atp6v1g1,BC031781,Becn1,Cdgap,Col20a1,Cops4,Cops5,Ctr9,D10Erted641e,D230037D09Rik,Dip2c,Dnajc15,Erp29,Fam175b,Fuca1,Gabpa,Gins4,Glipr2,Glud1,Gm13498,Gmcl1,Gtf2b,Hsd17b11,Iars2,Ifnar2,Ip6k2,Kctd10,Kctd2,Klhdc2,LOC677548,Lactb,Lcmt1,Llph,Lrrfp2,Map3k2,Mettl3,Mrpl18,Mrpl48,Mrps33,Mxd4,Ndufb6,Nipsnap3a,Nod1,Ostm1,Pdcd6,Pdcl3,Pdk3,Peci,Pfkfb3,Pgap2,Phb2,Pip4k2c,Plckhb2,Plk3,Ppp1r9b,Ppp3cc,Prkar1a,Psmc2,Psmc10,Psmc6,Ptpn9,Ptpn10,Rap2c,Rassf3,Rdh11,Rrp1,Rtcd1,Sap30l,Sars,Sbds,Sdf4,Sec11c,Sec23b,Senp2,Senp3,Sft2d2,Shfm1,Sifn2,Slu7,Smardc1,Srp9,Ssr1,Ssu72,Sugt1,Taf12,Tap2,Tax1bp3,Tbca,Tfdp1,Thra,Tmem19,Tmem41b,Tmem87b,Tsen34,Tspan5,Ufc1,Unc45a,Unc50,Utp23,Vcp,Vdac2,Vps29,Wdyh1,Zbed4, |
| Bbx    | NaN                            | 4732471D19Rik,5330426P16Rik,9230105E10Rik,Abhd10,Akr7a5,Anxa7,Cdc42ep4,Commd8,Fchsd2,H2-D1,Hmgb1,LOC100043371,Mapkapk2,Parp3,Ptpn22,Snpc2,Tcfe2a,Wdtd1,Wrn,                                                                                                                                                                                                                                                                                                                                                                                                                                                                                                                                                                                                                                                                                                    |
| Bcl3   | NaN                            | 8430419L09Rik,Adamtsl4,Ckb,Gm5617,H2-T24,Icam1,Jak3,Nat6,Nod1,Slc25a39,Socs3,                                                                                                                                                                                                                                                                                                                                                                                                                                                                                                                                                                                                                                                                                                                                                                                  |
| Bcl6   | NaN                            | 1110038D17Rik,Abhd1,Abtb2,Asb7,Atxn7l2,Ccdc50,Crip1,Dtx2,Extl3,Fam168a,Foxo3,Galm,Glipr1,Gm3771,Hsd12,LOC100044416,Ppp2r5b,Rab19,Slc25a45,St13,St7l,Tubb5,Txndc9,Ulk2,Wdr81,Ypel5,Zdhhc7,                                                                                                                                                                                                                                                                                                                                                                                                                                                                                                                                                                                                                                                                      |
| Bclaf1 | NaN                            | 1300010F03Rik,1810007M14Rik,4930522L14Rik,4930534B04Rik,A930005H10Rik,Bbx,Cep110,Chd9,Cpsf6,Ddhd2,Dicer1,Dlg1,Dopey1,Eml4,Fam178a,Fam36a,Gtpbp8,Ivns1abp,Lrba,Lrp6,Lysmd1,Ncapd3,Nnt,Pcm1,Prpf4b,Ranbp2,Rock2,Strbp,Tesc,Tmem184c,Trim24,Trpm7,Uba6,Uevld,Vps13a,Wwp1,Zfp280c,Zfp329,Zfp362,Zfp62,Zfp644,Zfp800,                                                                                                                                                                                                                                                                                                                                                                                                                                                                                                                                               |
| Brd8   | NaN                            | Bcr,Ddb2,Gm5299,Gm6560,Hus1,Laptm4b,Parp11,Trim41,Trim68,                                                                                                                                                                                                                                                                                                                                                                                                                                                                                                                                                                                                                                                                                                                                                                                                      |
| Carm1  | NaN                            | Armc7,Atxn7l2,C230052I12Rik,Disp1,Gpr65,H2-Ke6,Itm2c,Man2b2,Ndst2,Tmem141,Tnfrsf4,Ttc14,Zfp523,Zfp609,                                                                                                                                                                                                                                                                                                                                                                                                                                                                                                                                                                                                                                                                                                                                                         |
| Cbx3   | NaN                            | 2610030H06Rik,2700029M09Rik,4831426I19Rik,Acin1,Ap3s1,Arl6ip1,Ash2l,Atad2,Atp5c1,Atp6ap2,Brcc3,Cacybp,Ccdc72,Ccdc90a,Ccng1,Ccnh,Cct6a,Cct7,Commd6,Cops4,Cyb5,D5Wsu178e,Dcun1d2,Dek,Dgkz,Dnajb11,Eif2s1,Eif3e,Eri1,Ero1l,Exosc8,Fdft1,Fdps,Fut8,Gng10,H2afy,Hmgcr,Hnrnpab,Hprt1,Hps1,Hsdl2,Hspa5,Hspd1,Ilf2,Impa1,Iqsec1,Klf3,Larp7,Lta4h,Map4k3,Mat2a,Mdh1,Med31,Mgat2,Mis12,Mlxip,Mrpl32,Nat13,Ndufb6,Ndufc2,Nhp2l1,Nup107,Ola1,Olfr1419,Osbp18,Pcyox1,Pdia6,Pold3,Ppp2r1b,Prdx1,Psma6,Psmc2,Ptges3,Ran,Rnf13,Sar1b,Sarnp,Sart1,Sfrs9,Slbp,Smc6,Snrpb2,Snx5,Socs4,Spcc2,Spcc3,St13,Strap,Syncrip,Tceb1,Thoc4,Trappc2,Txndc9,Uba2,Ube2w,Vdac3,Zdhhc17,Zfp35,Zfp644,Zfp664,Zmpste24,rp9,                                                                                                                                                                        |
| Cbx4   | NaN                            | 2210016F16Rik,Adar,Adk,Alkbh5,Apobec1,Arid5b,Atp11c,Bat4,Brf1,Bub3,Def6,Dgkd,Dip2b,Flcn,Hnrnpab,Pbx2,Pcolce,Plekkg2,Ppp2r1b,Ptp4a2,Rab22a,Sec23ip,Stk11,Trim14,Vps37b,Zyg11b,                                                                                                                                                                                                                                                                                                                                                                                                                                                                                                                                                                                                                                                                                  |
| Cbx5   | fine_module_63                 | 2810417H13Rik,2900064A13Rik,3200002M19Rik,4930534B04Rik,Adam19,Ap4m1,Asf1b,Bcl2l13,Btdb12,Cdr2,Eif3c,Enpp4,Ezh2,Fam123a,Fam33a,Gins4,Hn1l,Mad2l1,Mast2,Mbnl3,Mipep,Mpp6,Nat5,Ncapd3,Nup50,Plk4,Pole4,Ppme1,Ppp2r5d,Rbbp8,Rnaseh2b,Srgap2,Tardbp,Tdp1,Tm9sf1,Tubb5,Vprbp,Wdr51b,Zbtb1,Zbtb43,                                                                                                                                                                                                                                                                                                                                                                                                                                                                                                                                                                   |
| Cbx7   | NaN                            | 2810408P10Rik,Apobec3,                                                                                                                                                                                                                                                                                                                                                                                                                                                                                                                                                                                                                                                                                                                                                                                                                                         |
| Chd3   | NaN                            | Dad1,Dtd1,Phxr1,Pnet-ps,Slc25a36,Slc48a1,                                                                                                                                                                                                                                                                                                                                                                                                                                                                                                                                                                                                                                                                                                                                                                                                                      |

| TF     | Enriched for Ontogenet targets | Targets                                                                                                                                                                                                                                                                                                                                                                                                                                                                                                                                                                                                                                                                                                                                                                                                                    |
|--------|--------------------------------|----------------------------------------------------------------------------------------------------------------------------------------------------------------------------------------------------------------------------------------------------------------------------------------------------------------------------------------------------------------------------------------------------------------------------------------------------------------------------------------------------------------------------------------------------------------------------------------------------------------------------------------------------------------------------------------------------------------------------------------------------------------------------------------------------------------------------|
| Chd7   | NaN                            | Atg16l1,Bmp2k,Brp44l,Centb1,Cetn2,Eif3c,Fbxl20,Gbas,Kdm6b,LOC675534,Myo9b,Obfc1,Rpl26,Serac1,Sfmbt2,Slc4a1,Snx19,Stard5,Tmem85,Trpm7,Usp3,Xbp1,                                                                                                                                                                                                                                                                                                                                                                                                                                                                                                                                                                                                                                                                            |
| Chd9   | NaN                            | Appl2,                                                                                                                                                                                                                                                                                                                                                                                                                                                                                                                                                                                                                                                                                                                                                                                                                     |
| Churc1 | NaN                            | Abcc5,Akr1a4,Drp1,Fbxo8,Fdps,Gm5617,Gtf2ird1,Krcc1,Nsdhl,Pcgf1,Trim23,                                                                                                                                                                                                                                                                                                                                                                                                                                                                                                                                                                                                                                                                                                                                                     |
| Clock  | NaN                            | Acaa1a,Akap11,Gnptab,Prkd3,Rnf121,Thap3,Ublcp1,                                                                                                                                                                                                                                                                                                                                                                                                                                                                                                                                                                                                                                                                                                                                                                            |
| Crebl2 | NaN                            | Arrb1,Cul1,Golm1,Kbtbd2,Klf3,Lrrc8d,Map4k5,Mblac2,Oxr1,Snopin,Snrpb,Thoc6,Tubb2c,Usp28,Zbtb43,Zrsr1,                                                                                                                                                                                                                                                                                                                                                                                                                                                                                                                                                                                                                                                                                                                       |
| Creg1  | NaN                            | 2310047M10Rik,2510006D16Rik,4930471M23Rik,4930518I15Rik,Athl1,Atpgd1,Camk2b,Cars2,Dap3,Dcps,E230001N04Rik,Elovl7,Fryl,Gclm,Glipr1,Gna12,Gng5,Iscu,Kif1c,Med11,Mobkl1a,Pde1b,Pygo2,Rffl,Rnasek,Scnm1,Snap23,Tbc1d22b,Tecr,Tm2d2,Tmem154,Tsga10ip,Ttc7b,Txn2,Usp21,Vamp8,Zfp36l2,Zfp691,Zfp746,Znrf1,                                                                                                                                                                                                                                                                                                                                                                                                                                                                                                                        |
| Csda   | NaN                            | Cks1b,Ddhd2,Kdsr,Klhdc5,Phka2,Rangap1,Wdr41,                                                                                                                                                                                                                                                                                                                                                                                                                                                                                                                                                                                                                                                                                                                                                                               |
| Ddx3x  | NaN                            | 1110037F02Rik,1500012F01Rik,2810008M24Rik,Acadm,Adam10,Adrb2,Atf7ip,B230380D07Rik,Becn1,Birc2,Casd1,Ccnc,Ccng2,Cdc42ep3,Cdkn1b,Cept1,Cflar,Chmp5,Dnajb9,Efha1,Eif1a,Eif4e3,Exoc3,Fbxo33,Fkbp1,Frg1,Gm885,Hiatl1,Hist1h2bh,Hmgcs1,Hnrnp2,Hpvcps,Hspa13,htt,ldh1,ldi1,lfrd1,lnpp1,Kif3b,Klhl2,Lars,Lin7c,Lyrm5,Mast2,Mettl9,Nek7,Nudt4,Obfc2a,Pdcd10,Pdcl,Pgrmc1,Pnpla8,Prpf18,Psmb2,Pts,Purb,Rab27a,Rala,Rap2c,Rbm12b,Reep3,Rtn4,Safb2,Samsn1,Sc4mol,Scp2,Sdha,Sec23ip,Serf2,Serp1,Slu7,Snpc5,Snx4,Snx6,Sri,Tceb1,Tcp11l2,Tmem106b,Tpm4,Trappc6b,Trmt12,Twistnb,Uba3,Vamp4,Vamp7,Vbp1,Wsb1,Zmat2,                                                                                                                                                                                                                           |
| Dmtf1  | NaN                            | 1110020G09Rik,1200016B10Rik,2010106G01Rik,2310035C23Rik,2410025L10Rik,3110052M02Rik,Acot9,Alad,Ap4s1,Atp5g2,Atp7a,Atp8a1,Baz2b,Ccdc111,Ccnl1,Cep170,Clk4,Cln6,Cpeb2,Cpeb4,Dcaf6,Ddx26b,Dgkh,Dhx57,Dtx4,E130120F12Rik,Eif3k,Eif6,Exoc5,Fam13b,Fam188a,Fam48a,Fam82b,Far1,Fzr1,Garnl1,Gm12258,Gm4832,Gm5044,Gm5050,Gm5070,Gm5766,Gpatch8,Gpr65,Gprasp1,Hist1h1e,Hist1h2bc,Hist1h4c,Homer1,Jhdm1d,Jmjd8,Kdm4c,Krit1,Lemd3,Mobkl1a,Mudeng,Myo5a,Nufip2,Osbpl8,Pibf1,Ppdpf,Prpf39,Ptbp2,RP23-38E20.1,Rabgap1l,Rasa1,Rb1,Rc3h1,Rcan3,Rmrp,Rnf146,Rny3,Rp2h,Rpl24,Rpl7a,Rplp1,Rps23,Rps24,Rps27,Rps28,Sass6,Setd2,Sfrs18,Sike1,Slc35b3,Snora34,Snora52,Snora61,Snord118,Snord49a,Snx14,Socs4,Spata1,Stx17,Tatdn1,Tbce,Terc,Tmem160,Tmem62,Tmem87a,Trip11,Trip4,Trnt1,Vat1,Wdr26,Wdr44,Zbtb6,Zfc3h1,Zfml,Zfp51,Zfp595,Zmym5,Zufsp, |
| Dnmt3a | NaN                            | Apbb3,Bat2l,Eno3,Hif1an,Isca1,Kdm5b,Magi3,Maml2,Mgat5,Mta1,Pcnx,Pja1,Ptar1,Rad18,Ramp1,Rap1gds1,Rexo4,Rhoh,Rnf213,Slc37a1,Spata2,Trp53i13,                                                                                                                                                                                                                                                                                                                                                                                                                                                                                                                                                                                                                                                                                 |
| Dtx3l  | fine_module_272                | 1200016B10Rik,2310061J03Rik,6330442E10Rik,Abcb7,Apobec3,Ate1,BC057170,Dcaf13,Ddx60,Foxo3,Frg1,Gbp2,Gm7774,Hdac1,Herc5,lfi1,Il15ra,Irgm1,Isg20,Lsm6,Mrpl36,Nmi,OTTMUSG0000009332,Parp14,Pdcd10,Phkg2,Rab19,Slc30a6,Sifn5,Sptlc2,Tapbp,Trim21,Trim30,Txndc17,Vamp7,                                                                                                                                                                                                                                                                                                                                                                                                                                                                                                                                                          |
| E2f2   | NaN                            | Dusp6,Zfp277,                                                                                                                                                                                                                                                                                                                                                                                                                                                                                                                                                                                                                                                                                                                                                                                                              |
| Eed    | NaN                            | 4933424B01Rik,Actr6,Arhgap10,Btbd10,C330018D20Rik,Ccdc117,Ccdc45,D4Wsu53e,Dnaja1,Dnajc8,Fam102b,Gimap9,Hsd17b4,Ier5,Immp11,Pcolce,Ptar1,Ubxn2a,Vbp1,Zfp595,Zfp706,                                                                                                                                                                                                                                                                                                                                                                                                                                                                                                                                                                                                                                                         |
| Etv6   | NaN                            | Abr,Ampd2,Birc2,Bysl,Cd68,Xaf1,                                                                                                                                                                                                                                                                                                                                                                                                                                                                                                                                                                                                                                                                                                                                                                                            |
| Ezh1   | NaN                            | Abca3,Ccdc45,Gadd45b,Jun,Klf3,Polg2,S100a13,Slc25a46,Snord35a,Tbc1d14,Ttbk2,Uqcr,                                                                                                                                                                                                                                                                                                                                                                                                                                                                                                                                                                                                                                                                                                                                          |

| TF     | Enriched for Ontogenet targets | Targets                                                                                                                                                                                                                                                                                                                                                                                                                                                                                                                                                                                                                      |
|--------|--------------------------------|------------------------------------------------------------------------------------------------------------------------------------------------------------------------------------------------------------------------------------------------------------------------------------------------------------------------------------------------------------------------------------------------------------------------------------------------------------------------------------------------------------------------------------------------------------------------------------------------------------------------------|
| Ezh2   | NaN                            | 1810074P20Rik,4933439F18Rik,Actn4,Agxt2l2,Atpif1,BC002199,BC052040,Cct5,Clic4,Cln6,Cops6,Ctdspl2,Depdc5,Dnm1l,Dpagt1,Fusip1,Ggta1,Gtf2i,H2afv,Lnx2,Lsm8,Mobkl2b,Ppm1g,Prkci,Rad18,Rala,Sfxn1,Slc43a3,Smarca5,Tmem188,Tor3a,Wdr26,Zc3h12d,Zfp367,                                                                                                                                                                                                                                                                                                                                                                             |
| Fam48a | NaN                            | 2810428I15Rik,5830472F04Rik,Akr1b3,Ankrd44,Anks3,Birc6,Clock,Cluap1,Cog5,Cstb,Dynll2,E130309D02Rik,Eif3i,Exoc6b,Fau,Fbxo6,Fnbp4,Gdi1,Gfm2,Gm10099,Gm11814,Gm12760,Gm3771,Gm5129,Gm5502,Gm7123,Gm8995,Grccl0,Hist3h2b,Igfbp4,LOC100134980,Lgals3bp,Lsm6,Lsmd1,Map4k3,Mcts1,Mgea5,Mif,Mpst,Mrps11,Myeov2,Ndufa13,Ndufb9,Ndufc2,Ndufs8,Ninj1,Nktr,Oas1b,Ogt,Parp8,Pde1b,Polr2f,Ppm1d,Prdm9,Psmb5,Pygo2,Rbks,Rela,Rpl11,Rps12,Rps13,Rps29,Scarna17,Sec61g,Senp2,Slc25a27,Slc25a36,Slc35b2,Snape3,Snord34,Snord35b,Snord82,Snrpd2,Snx29,Socs1,Tep1,Tmc4,Tmem194b,Tmem87b,Tomm7,Trim34,Tsga10ip,Tuba1a,Usp45,Vaultrc5,Wipi2,Yif1b, |
| Foxj2  | NaN                            | 3110003A17Rik,4930562F07Rik,4933437N03Rik,Ate1,Bat2,Bcl6,Brp44l,Chst12,Ctso,Dcaf13,Dusp7,Etv6,Fam33a,Fbrs,Gltsr1,Gm10091,Gnas,Hspa8,Macf1,Myo9b,Ndufb4,Rara,Rbms1,Rela,Rps7,Tbx6,                                                                                                                                                                                                                                                                                                                                                                                                                                            |
| Foxn3  | NaN                            | Coro1c,Leprot,Ndfip2,                                                                                                                                                                                                                                                                                                                                                                                                                                                                                                                                                                                                        |
| Foxo3  | NaN                            | 0610037P05Rik,2010109K11Rik,9030624G23Rik,Abhd13,Acadsb,Acsl4,Ap3m2,Apobec1,Arf3,Arhgap15,Atp6v1c1,Bag1,Bcl6,Brd3,C030016D13Rik,C330007P06Rik,Ccnj,Cyb5d2,D730003I15Rik,DDi2,Dennd2d,Dnmbp,Dtx3l,Fam103a1,Fbxl20,Gm5774,Hba-a1,Hba-a2,Hbb-b1,Hmbox1,Kif1b,Lass2,Lrrc57,Mrpl33,Nae1,Pacsin2,Pgm1,Pot1b,Pqlc3,Prr13,Pttg1ip,Rapgef2,Slc29a3,Sqrdl,Ssh2,Tuba1b,Tuba1c,Ufm1,Yipf5,Zfat,Zfp87,Zswim6,                                                                                                                                                                                                                             |
| Foxp4  | NaN                            | Alg3,Bcorl1,Cat,Ccdc101,Cherp,Cog1,Crtc3,Ctsa,D330012F22Rik,Dapp1,Dnajb5,Dullard,Dvl3,Dynlrb1,Gaa,Hdac7,Khsrp,Lsmd1,Map4k1,Ncor2,Nfatc2,Pmf1,Prr12,Psmf1,Reep4,Rpl35a,Runx3,Slc35a4,Sifn2,Smg5,Taf6,Tmem63b,Tram2,Tyk2,Vps37c,Zfp335,Zfp362,Zmiz1,                                                                                                                                                                                                                                                                                                                                                                           |
| Fubp1  | fine_module_13                 | 6720456H20Rik,A830080D01Rik,Aebp2,Akap9,Akt3,Ankib1,Ash1l,Atp13a3,Atp2a2,Bclaf1,Bloc1s1,Camk2b,Cib1,Erc1,Ergic3,Exoc4,Guk1,Hcst,Huwe1,Mad1l1,Mapre2,Ndufa8,Ocrl,Orai3,Pds5b,Phf20,Pold4,Ptar1,Rb1,Rps14,Slc20a1,Suhw4,Tmem68,Tnlp1,Uqcrh,Use1,Yipf1,                                                                                                                                                                                                                                                                                                                                                                         |
| Fus    | NaN                            | Aak1,Anxa5,Banp,Cd46,Cirbp,D730040F13Rik,Fusip1,Gm16489,Hnrnpa1,lft20,Mib2,Mrpl20,Sec63,Spryd3,Tdp1,Zc3h6,                                                                                                                                                                                                                                                                                                                                                                                                                                                                                                                   |
| Hdac1  | NaN                            | 1500041N16Rik,2510006D16Rik,Ak3,Ankrd50,C030046E11Rik,Dcp2,Dek,Gm4864,Gpr97,Hist1h4b,Hist1h4d,Hist1h4m,Ldlrap1,Pion,Rbm7,Tmem39b,Zfp828,                                                                                                                                                                                                                                                                                                                                                                                                                                                                                     |
| Hdac4  | NaN                            | Cpeb2,Rnf160,Safb2,Slc25a30,Tbcel,Zbtb43,Zswim6,                                                                                                                                                                                                                                                                                                                                                                                                                                                                                                                                                                             |
| Hdac5  | NaN                            | 2310011J03Rik,2310028H24Rik,Aldh4a1,Dctn2,Dennd3,Dnm1l,Fbxo46,Fuca1,Gadd45b,Gdi1,Inpp1,Lrrc68,Lsm10,Mboat7,Med22,Mical1,Mknk2,Naif1,Nfkbie,Ninj1,Pfas,Pitpnm1,Prex1,Ptp4a2,Pygo2,Rxra,Sema4b,Slc35a3,Smpd2,Tbc1d17,Tmem104,Tnfrsf1b,Tspo,Ttc7,Ulk1,Zfp426,                                                                                                                                                                                                                                                                                                                                                                   |
| Hdac6  | NaN                            | Adh5,Fam20b,Psmc2,Sfi1,                                                                                                                                                                                                                                                                                                                                                                                                                                                                                                                                                                                                      |
| Hdac7  | NaN                            | 9930012K11Rik,A530032D15Rik,Adcy7,Arid4b,Bat2l,Cpped1,Fam38a,Gm10136,Gm10345,Gm15772,Gtf2i,Hmbox1,Lta4h,Mical1,Mil2,Mrpl54,Pkd1,Rltpr,Rnf13,Srcap,Tbc1d22b,Tet3,                                                                                                                                                                                                                                                                                                                                                                                                                                                             |



| TF     | Enriched for Ontogenet targets | Targets                                                                                                                                                                                                                                                                                                                                                                                         |
|--------|--------------------------------|-------------------------------------------------------------------------------------------------------------------------------------------------------------------------------------------------------------------------------------------------------------------------------------------------------------------------------------------------------------------------------------------------|
| Hes6   | NaN                            | 1500032L24Rik,2010011I20Rik,2900010M23Rik,Abhd11,Abl1,Agpat1,Bscl2,Chmp1a,Ciapin1,Coro1c,Ctsb,Cyb5,D14Ert449e,D17H6S53E,Dlg1,Dpp7,E230001N04Rik,Eif1b,Eml3,Entpd5,Entpd7,Exosc1,Fam108c,Fam132a,Gipc1,Gna12,Gpc1,Gstp1,Hmgxb3,Hspa13,Illkap,Klhdc3,Manbal,Mrpl20,Mrpl34,Ndufa13,Nxn,Pgd,Pigx,Psm e2,Rab19,Rfxank,Sf3b5,Slc26a2,St3gal2,Syng2,Tagln2,Tmem160,Tmsb10,Tnf,Tubg1,Ube4b,Uqcr,Zfp386, |
| Hif1a  | NaN                            | 4933411K20Rik,Arf2,Cd200r1,Ctsc,Gclm,Kbtbd7,Larp4,Lipa,Lrrc58,Nampt,Snap29,Snapc1,Tmem106c,Tmem184c,Trrap,Tll1,Zfp456,                                                                                                                                                                                                                                                                          |
| Hivep1 | NaN                            | 2010016I18Rik,2410042D21Rik,9430008C03Rik,A430107D22Rik,Ccnyl1,Cpeb4,D15Wsu169e,Frrs1,Gprasp1,Hipk2,Lman2l,Mgat5,Olfml3,Pbx4,Pcnx,Phkb,Plcb2,Pnpla6,Pomt1,Ppm1h,Rtn4,Sipa1l1,Sifn1,Spred2,Stag1,Tet3,Ube4b,                                                                                                                                                                                     |
| Hltf   | NaN                            | 0610010K06Rik,9030607L17Rik,C1galt1,Ccnh,Cryz1l,Cwc22,Ercc6,Gm7079,Gna13,Gnptg,Hps3,Lgals8,Mcrs1,Nt5c2,Ntng2,Ptp4a3,Rg9mtd3,Sidt2,Smap1,Terf2ip,Tmod3,Zfp157,Zfp182,Zfp451,                                                                                                                                                                                                                     |
| Hmgb1  | NaN                            | 4930412M03Rik,Agpat5,Bbx,Btg2,Ccn1l,Gm2509,Gm8594,Gpr132,LOC677565,Ldlrap1,Mkl2,Naglu,Pot1b,Supt3h,Txndc12,                                                                                                                                                                                                                                                                                     |
| Id2    | NaN                            | Ergic1,Gpr132,Lgals8,Ndfip2,Pole4,Prkx,Reep5,Rnf144a,Rnft1,Setd3,Tnfrsf13b,Zhx3,                                                                                                                                                                                                                                                                                                                |
| Ikzf5  | NaN                            | Aim1,BC032203,Cry1,Eftud1,Epm2aip1,Ifrg15,Mical3,Slc35d2,Tmem126b,Tns1,Usp38,Zbtb44,                                                                                                                                                                                                                                                                                                            |
| Irf3   | NaN                            | 1810055G02Rik,Alkbh4,Alkbh6,Ap2m1,Arsa,Atp13a1,Atp6v1f,Bcat2,Cox5b,Crot,Dad1,Dcun1d2,Fcgrt,Fzr1,Gm11741,Gm6394,Gys1,Htatip2,Jhdm1d,Josd2,Lsm4,Mcart1,Nudt22,Nup62,Pold4,Psен2,Psb5,Pygb,Rnasek,Rpia,Rpl13a,Slc36a1,Snord33,Snx15,St7l,Stk40,Tbc1d13,Tmem223,Tomm34,Tsta3,Uhrf2,Usp21,Wbscr22,Zfp715,                                                                                            |
| Irf7   | NaN                            | 1110032A03Rik,1810058I24Rik,2310047M10Rik,Alg12,Ccdc97,Crlf3,Dcaf11,Dhx58,Fbrs,Galnt10,Gm14251,Iifi27I2a,Impad1,Irf9,Oas3,Psb8,Smpd1,Spsb3,Stat2,To b1,Trappc2l,                                                                                                                                                                                                                                |
| Irf9   | fine_module_269                | 1810006K21Rik,5830415L20Rik,Adar,Atp13a1,BC006779,Cenpq,Cln3,Cmpk2,Dhrs1,Dtx3l,Epsti1,Etohi1,H2-Q8,H2-T22,H2-T23,H2-T24,Hsh2d,Iifi35,Ifit1,Ifit3,Iqsec1,Irak4,Irf7,Irgm2,Lgals3bp,Lpcat4,Oas1b,Oas1g,Oas2,Oasl1,Parp12,Parp9,Pml,Pyroxd1,Rnasel,Rnf213,Rtp4,Stat1,Tap1,Trex1,Trim14,Trim25,Trim34,Ube1l,Usp18,Xaf1,Zbp1,Zbtb26,                                                                 |
| Jun    | NaN                            | Junb,Kcnn4,                                                                                                                                                                                                                                                                                                                                                                                     |
| Junb   | NaN                            | Cenpv,Crot,Dusp1,Dusp5,Ezh1,Hexim1,Hist1h1c,Hist1h4m,Josd2,Jund,Mfsd8,Taok1,                                                                                                                                                                                                                                                                                                                    |
| Jund   | fine_module_174                | 5031439G07Rik,Abcg1,Acot7,BC029214,Btg2,Dbp,Gm2a,Hnrnpa0,Hsh2d,Ier2,Ier5,Irs2,Irgb7,Jkamp,Junb,Ndufs6,Ocel1,Pag1,Sidt2,Whamm,Zdhhc3,                                                                                                                                                                                                                                                            |
| Kdm5b  | NaN                            | Acadsb,Atp1a3,Chmp7,Cog2,Commdd8,Dok2,Dynlt1,Idh3g,Impa1,Lpin2,Pdia4,Ppapdc1b,Rnf11,Ublcp1,Zfc3h1,                                                                                                                                                                                                                                                                                              |
| Kdm5d  | fine_module_331                | 1700016K19Rik,Adcy7,Cdc2l6,Ddx3y,Eif2s3y,Idua,Rbm41,Stard4,Uty,Xrn2,Yipf5,                                                                                                                                                                                                                                                                                                                      |
| Kdm6b  | NaN                            | 1500010J02Rik,2700060E02Rik,C1galt1,Centb1,Chordc1,Cyb5d2,Dip2c,EG667078,Fam36a,Fcgrt,Gm10136,Gm15772,Gm9197,Kif1c,Lmbrd2,Napa,Ostc,Pcna,Phf21a,Pias3,Rara,Senp3,Sfn,Sh3bgrl,Trim8,Trp53i11,Ttc35,Ttc7b,Xaf1,Zdhhc18,Zfp335,Zfp398,Zfp746,                                                                                                                                                      |
| Klf10  | NaN                            | Ak3,Arrdc4,Cpt1a,Dera,Fbxo22,Lpcat4,Slc35c1,Slc48a1,Snrpe,Syt1l,                                                                                                                                                                                                                                                                                                                                |
| Klf13  | NaN                            | Bcl9,Ccnt1,D10Wsu52e,Eif3h,Gm4832,Gmfg,Iah1,Jund,Klhl18,Phip,Rpr1l,Rprl2,St3gal1,Vaultrc5,Ywhah,                                                                                                                                                                                                                                                                                                |
| Klf3   | NaN                            | Arrdc3,Ezh1,F630110N24Rik,Fam117b,Insr,Myliip,Rps6ka2,Sec23a,                                                                                                                                                                                                                                                                                                                                   |

| TF      | Enriched for Ontogenet targets | Targets                                                                                                                                                                                                                                                                                                                                                                                                                                                                                                                                                              |
|---------|--------------------------------|----------------------------------------------------------------------------------------------------------------------------------------------------------------------------------------------------------------------------------------------------------------------------------------------------------------------------------------------------------------------------------------------------------------------------------------------------------------------------------------------------------------------------------------------------------------------|
| Klf7    | NaN                            | Ap4e1,Gm4864,Hivep1,Rbm26,Samhd1,Thoc2,Ypel5,                                                                                                                                                                                                                                                                                                                                                                                                                                                                                                                        |
| Lcor    | NaN                            | 2700049A03Rik,4933426121Rik,AI606181,Amn1,Ankrd13a,Bbs9,Cndp2,Crkr5,D16Ert472e,D730040F13Rik,Ddit4,Dusp11,Dzip3,Fam160b1,Galnt2,Gm11285,Gm114,Gm5785,Gng12,Gpd2,Hbs1,Impad1,Kctd10,LOC546695,Manba,Mdm4,Mmgt1,Narg1l,Nme3,Pigb,Rnf14,Samm50,Suhw4,Tmem65,Tshz3,Uhrf2,Zmynd8,                                                                                                                                                                                                                                                                                         |
| Lmo2    | NaN                            | Rps9,Tmem184c,                                                                                                                                                                                                                                                                                                                                                                                                                                                                                                                                                       |
| Lpp     | NaN                            | 3110057O12Rik,4833420G17Rik,4933407H18Rik,Atxn1,Atxn7l1,Bloc1s2,Ccdc28a,Ctso,Gab3,Gdap10,Itpa,Mbd5,Mpp5,Prkar1a,Prune,Tatdn3,Tlr6,Tmem156,Tmem161b,Xrcc4,                                                                                                                                                                                                                                                                                                                                                                                                            |
| Lrrfip1 | NaN                            | 2410089E03Rik,4930523C07Rik,G2e3,Grap,Hgsnat,ND6,                                                                                                                                                                                                                                                                                                                                                                                                                                                                                                                    |
| Mef2a   | NaN                            | Adam9,Arhgap9,Arl6ip1,C230081A13Rik,Calcr1,Fdps,Galns,L1cam,Lrwd1,Mrpl12,Ran,Rnaseh2c,Rps9,                                                                                                                                                                                                                                                                                                                                                                                                                                                                          |
| Mga     | NaN                            | 1190005F20Rik,1700047117Rik1,4930432O21Rik,8430426H19Rik,Acpp,Ascc3,Ccdc92,Ccnc,Invs,Lcor,Map2k5,Mctp2,Nfe2l2,Setd3,Slc26a2,Smarca2,Tbc1d5,Thada,Tmed5,Tmod4,Uba3,Ylpm1,Zfp809,Zfp826,                                                                                                                                                                                                                                                                                                                                                                               |
| Mll1    | NaN                            | AU042671,Atf7,Atp5h,Dbi,Dgkd,Frat2,Gm16372,Med4,Mll2,Mrpl43,Pcmt1,Pgk1,Psmb4,Shc1,Spry3,Zfp622,                                                                                                                                                                                                                                                                                                                                                                                                                                                                      |
| Mll3    | NaN                            | 1190002H23Rik,2310011J03Rik,2900097C17Rik,4930518I15Rik,4930579G24Rik,4932438A13Rik,A230067G21Rik,Aak1,Ankrd16,Atp11a,BC021381,Basp1,Bcas3,Ccdc117,Cd46,Cdk5rap1,Cdt1,Cmah,ENSMUSG00000073622,Fam65b,Gm10640,Gm16494,Gm6041,Gpr52,H2afz,Hist1h2an,Hist1h4f,Hist2h2aa1,Hnrnp2,Hsn2,Huwe1,Hvcn1,Ipcef1,Lrrc59,Macf1,Maml2,Mfsd8,Mll2,Mll5,Ndufa11,Nfat5,Nhp2l1,Nop56,Nrbf2,Nudt3,Nup50,Olf372,Parp9,Pgam1,Pgm1,Phf21a,Polr1d,Ppap2b,Rcc2,Rnf26,Rpl13a,Rpl3,Rpl34,Rps8,Serp1,Smg1,Snap29,Snrpg,Tmem71,Tpm3,Ttll4,Vps13b,Wasl,Ypel1,Zcchc11,Zfc3h1,Zfp182,Zfp236,Zfp407, |
| Mll5    | fine_module_54                 | 1810037117Rik,2010111I01Rik,2210018M11Rik,2610039C10Rik,2810474O19Rik,9930021J03Rik,A530017D24Rik,A930024E05Rik,Actn4,Appbp2,Aprt,Asf1b,Ash1l,Bmpr2,Braf,C430010C01,Cd55,Chchd2,Diap2,Dmtf1,Fcho2,G3bp1,Gm10521,Gm12260,Gm12474,Gm9713,Gngt2,Hist2h3b,Hist3h2a,Hmgn2,Hnrnpa0,Hyou1,LOC100044416,Maml3,Mdh1,Mettl9,Mrpl30,Mrpl54,Myb,Myo9a,Ncoa1,Ndufaf1,Phxr1,Pnet-ps,Pold1,Pou5f2,Rangrf,Rbbp6,Rpl23a,Rpl27,Rpsa,Safb2,Scaper,Slc29a1,Sos1,Sos2,Tabbp,Tet2,Thoc4,Tnks1bp1,Tspo,Zbtb20,                                                                              |
| Mlxip   | NaN                            | Bat2l,Chuk,Commd2,Cyp4f13,Fnbp4,Fry,I15ra,Mcts1,ND3,Ogt,Phc3,Rere,Scnm1,Sipa1l3,Tm2d1,Uba6,Vps33a,Wdr13,Znf512b,                                                                                                                                                                                                                                                                                                                                                                                                                                                     |
| Mta1    | NaN                            | 2410025L10Rik,3110001D03Rik,5930416I19Rik,Afg3l2,Aldh9a1,Amz2,Ap2a2,Arf2,Atp2a2,Bckdk,Bcl9,Cd84,Cdc23,Cdk2,Cndp2,Cox18,Cpsf1,Dicer1,Ehmt2,Eif1ad,Elmo2,Esyt1,Fbxl6,Galnt2,Gne,Gusb,Hdac6,Ifitm5,Igf2r,Igfbp4,Jmjd8,Kcnab2,Lrpap1,Map2k5,Map3k7,Map4k1,Mast2,Mcm7,Med24,Mif,Mrpl39,Ndufa9,Nup62,Patz1,Paxip1,Pigq,Polg,Ppp5c,Rad54l2,Rltpr,Rnf166,Sel1l,Smarcb1,Snhg1,Snord33,Sreb2,Stat2,Suv420h2,Tbcd,Tbl2,Zfp128,                                                                                                                                                  |

| TF     | Enriched for Ontogenet targets | Targets                                                                                                                                                                                                                                                                                                                                                                                                                                                                                                                                                                                                                                                                                                                                                                                                                                                                                                                                                                                                                                                                                                                                                                                                                                                                                                                                          |
|--------|--------------------------------|--------------------------------------------------------------------------------------------------------------------------------------------------------------------------------------------------------------------------------------------------------------------------------------------------------------------------------------------------------------------------------------------------------------------------------------------------------------------------------------------------------------------------------------------------------------------------------------------------------------------------------------------------------------------------------------------------------------------------------------------------------------------------------------------------------------------------------------------------------------------------------------------------------------------------------------------------------------------------------------------------------------------------------------------------------------------------------------------------------------------------------------------------------------------------------------------------------------------------------------------------------------------------------------------------------------------------------------------------|
| Mtf2   | NaN                            | 2410042D21Rik,4933433P14Rik,AW209491,Agps,Ankrd46,Arpc5,Atg4a,Atg5,Atl2,B3gnt2,Brd9,Bxdc5,Casp8ap2,Cct8,Cdk2ap2,Cldnd1,Cmas,Ctnnb1,Cugbp1,Cul1,Dcun1d5,Ddx3x,Dhx15,Dhx29,Dld,Dnajb14,Dnajc13,Eed,Efr3a,Erp44,Fam175b,Fam69a,Fytd1,Gm7381,Gmcl1,Gmfb,Insig1,Ireb2,Isy1,Itga6,Kbtbd2,Krr1,LOC669999,Lcor,Llph,Lmbrd1,Ly75,Lypla1,Lypla2,Manea,Med6,Metap2,Mll2,Morc3,Mospd2,Mre11a,Mterfd1,Nars,Ndufaf1,Nup88,Nxt2,Ostm1,Otud6b,Oxsr1,Paip1,Pcmt1,Pik3cb,Polr2k,Polr3k,Ppig,Prdx3,Prmt10,Psmb4,Psmc6,Psmc6,Psmc6,Psmc6,Rab21,Rab22a,Rab2a,Rab5a,Rfc1,Rnf130,Rnf160,Rpe,Sec11c,Sept7,Sfrs3,Sgk3,Slc25a40,Slc35a3,Smarca5,Smc3,Smg1,Snx1,Sp140,Spast,Stx12,Sucla2,Sugt1,Sypl,Taf10,Tesk1,Tmbim4,Tmed5,Tmem161b,Tmem188,Tmem33,Tmem55a,Tmx1,Tmx3,Tmx4,Tnfaip8,Tpd52l2,Trdn,Trp53i13,Tspan13,Ttc15,Ube2v2,Ugdh,Ugp2,Uhrf2,Vrk1,Zcchc9,Zfp131,Zfp622,                                                                                                                                                                                                                                                                                                                                                                                                                                                                                                   |
| Mxd4   | NaN                            | 1700081L11Rik,D030074E01Rik,Dctn3,Ddit4,Dynll1,Fam53b,Fnip1,Gpkow,Ier5,Igbb1bp1,Lrrc59,Mat2a,Mprip,Orc3l,Pgam1,Rbm25,Sesn3,Sfrs5,Spred2,Uggt1,Zfp771,                                                                                                                                                                                                                                                                                                                                                                                                                                                                                                                                                                                                                                                                                                                                                                                                                                                                                                                                                                                                                                                                                                                                                                                            |
| Myb    | NaN                            | Casp7,Med21,Psmc6,Pwp1,Tiam1,Xylt1,                                                                                                                                                                                                                                                                                                                                                                                                                                                                                                                                                                                                                                                                                                                                                                                                                                                                                                                                                                                                                                                                                                                                                                                                                                                                                                              |
| Mysm1  | fine_module_235                | 1810074P20Rik,2210012G02Rik,2210404J11Rik,3110048L19Rik,4932441K18Rik,4933427D14Rik,5730419I09Rik,5830415L20Rik,6330416L07Rik,A230046K03Rik,A630047E20Rik,AI314180,Acdb5,Adam17,Ahsa2,Aim2,Anapc4,Angel2,Ap4b1,Apol,Appl1,Arhgap15,Arid4b,Armc8,Asah1,Ate1,Atp11c,Atp9b,Avl9,Azin1,Bclaf1,Bfarr,Brf1,Brwd1,Ccdc75,Ccdc93,Cd84,Cdc73,Cep350,Chuk,Cir1,Col4a3bp,Crot,Csgalnact2,Cwf19l2,D030074E01Rik,D14Abb1e,Daam1,Dcaf17,Dcun1d1,Dhx36,Dhx40,Dmft1,Dync1li2,Edem3,Ercc5,Esco1,Fam116a,Fam76b,Fbxo8,Fndc3a,Fnip1,Gcc2,Gls,Gm10459,Gm10673,Gm11270,Gm13213,Gm5488,Golga5,H2afz,Herc1,Herc3,Hist1h2ak,Hist2h4,Hlhf,Hnrnp3,Ikzf5,Ireb2,Kat2b,Klhl5,Krcc1,Lins2,Lmbrd2,Lonp2,Man2a1,Map3k2,Map3k5,Map3k7,Mfn1,Mfsd7b,Mib1,Myst4,Nat12,Nmi,Nt5dc1,Ofd1,Oma1,Orc4l,Pcmt1,Pex13,Pggt1b,Phc3,Phkb,Pigm,Pik3c2a,Pip4k2a,Pkn2,Ppm1b,Psmc4,Pyroxd1,Rab11fp2,Rab12,Rabgap1,Rap1gds1,Rasa2,Rbm25,Rbm26,Rbm41,Rfesd,Ric8b,Rictor,Riok3,Rnf138,Rnf139,Rpl36al,Rps6ka3,S100pbp,Sacm1l,Scai,Scfd1,Sdccag1,Sel1l,Setx,Sfrs5,Slc37a3,Slk,Sltm,Smek2,Snapc1,Snx13,Sp4,Spag9,St7l,Styx,Syne1,Taf1b,Tardbp,Tbk1,Thoc2,Tia1,Tmed8,Trappc4,Trim23,Trio,Ttc13,Ttc14,Ube2w,Ube3a,Uimc1,Usp33,Vav3,Vps13c,Vps13d,Vps41,Vps54,Vti1b,Wdr37,Wdr77,Xiap,Zbtb1,Zbtb37,Zc3h7a,Zdhhc17,Zfand6,Zfp386,Zfp426,Zfp445,Zfp654,Zfp719,Zfp760,Zfp771,Zfp810,Zfp825,Zfyve16,Zrsr2,Zyg11b, |
| Myst4  | NaN                            | 1110038D17Rik,6030446N20Rik,Arhgap17,Atrnl1,Btbd9,Cytsa,Dip2b,Flot1,Galnt7,Hinfp,Hlcs,Ikbbk,Itgb1bp1,Kif13b,Lats2,Mtor,Nat13,Nhlrc2,Nlk,Page1,Pfkfb3,Phactr2,Pik3c3,Syncrip,Trim26,Trim39,Trrap,Usp12,Zbtb34,                                                                                                                                                                                                                                                                                                                                                                                                                                                                                                                                                                                                                                                                                                                                                                                                                                                                                                                                                                                                                                                                                                                                    |
| Nfat5  | NaN                            | AU017193,Atp6v1c1,Atp8b4,Camk1d,Dennd1b,Erp27,Fyco1,Gm10388,Gm14335,Mll3,Mpzl3,Pigp,Pion,Pot1b,Ralgps1,Rb1cc1,Rbms1,Scarb1,Slc25a37,Tpi1,Ubn2,Zfp53,                                                                                                                                                                                                                                                                                                                                                                                                                                                                                                                                                                                                                                                                                                                                                                                                                                                                                                                                                                                                                                                                                                                                                                                             |
| Nfatc2 | NaN                            | 6330442E10Rik,AU017193,Atp6v0a2,Dusp5,Ssh1,Tnk2,Wdr61,Zfp467,                                                                                                                                                                                                                                                                                                                                                                                                                                                                                                                                                                                                                                                                                                                                                                                                                                                                                                                                                                                                                                                                                                                                                                                                                                                                                    |
| Nfe2l2 | NaN                            | 4930422I07Rik,6030499A19Rik,Ccdc56,Commd7,Cwf19l2,Gm1966,Hus1,Lmbrd2,Man2a2,Mga,Pdcd10,Reep4,Sec61b,Tnfrsf13b,Uty,Vamp7,Zbtb44,                                                                                                                                                                                                                                                                                                                                                                                                                                                                                                                                                                                                                                                                                                                                                                                                                                                                                                                                                                                                                                                                                                                                                                                                                  |
| Nfkbie | NaN                            | Actr5,Apeh,Arhgap17,Atg2a,Bcdin3d,Csprs,Dalrd3,Dctn3,Dhrs7,Fbxo42,Fhl3,Fmnl3,Galt,Gatsl3,Gcn1l1,Gfm2,Gm7609,Hinfp,Ltb,Manba,Nubp2,Pcnp,Prkce,Rbms1,Rfx5,Rgl2,Ring1,Rnf123,S100pbp,Slc35b2,Smox,Sphk2,Tcea1,                                                                                                                                                                                                                                                                                                                                                                                                                                                                                                                                                                                                                                                                                                                                                                                                                                                                                                                                                                                                                                                                                                                                      |
| Nr4a1  | NaN                            | Cst3,Dusp5,Jazf1,Rhbdd2,Trim8,                                                                                                                                                                                                                                                                                                                                                                                                                                                                                                                                                                                                                                                                                                                                                                                                                                                                                                                                                                                                                                                                                                                                                                                                                                                                                                                   |
| Patz1  | NaN                            | Atp2a3,Bcr,Cabin1,E330009J07Rik,Map3k4,Mdc1,Rptor,Sema4b,Tap1,                                                                                                                                                                                                                                                                                                                                                                                                                                                                                                                                                                                                                                                                                                                                                                                                                                                                                                                                                                                                                                                                                                                                                                                                                                                                                   |

| TF     | Enriched for Ontogenet targets | Targets                                                                                                                                                                                                                                                                                                                                                                                                                                                                                                                                                                                                                                                                                                                                                                                                                                                                                                                                                                                                                                                                                                                                                                                                                                                                                                                                                                                                                                                                                                                                                                                                                                                                                                                                                                                                                                                                                                                                                            |
|--------|--------------------------------|--------------------------------------------------------------------------------------------------------------------------------------------------------------------------------------------------------------------------------------------------------------------------------------------------------------------------------------------------------------------------------------------------------------------------------------------------------------------------------------------------------------------------------------------------------------------------------------------------------------------------------------------------------------------------------------------------------------------------------------------------------------------------------------------------------------------------------------------------------------------------------------------------------------------------------------------------------------------------------------------------------------------------------------------------------------------------------------------------------------------------------------------------------------------------------------------------------------------------------------------------------------------------------------------------------------------------------------------------------------------------------------------------------------------------------------------------------------------------------------------------------------------------------------------------------------------------------------------------------------------------------------------------------------------------------------------------------------------------------------------------------------------------------------------------------------------------------------------------------------------------------------------------------------------------------------------------------------------|
| Pbrm1  | NaN                            | AW554918,Abca7,Ap1s3,Arl6ip4,Bod1l,Bola2,Cblb,Cct6a,Dek,Dmnl1,Eif3j,Fam45a,Gm5774,Gm5775,Hipk3,Iars2,Lactb,Lin7c,Lrrc1,Mlf2,Oaz1,Ppp1ca,Psmid7,Ptpra,Rnu1b1,S100a13,Sars,Sec11c,Slc9a9,Ssh1,Synj2bp,Tmem120a,Tnpo1,Ttc35,Zfp710,                                                                                                                                                                                                                                                                                                                                                                                                                                                                                                                                                                                                                                                                                                                                                                                                                                                                                                                                                                                                                                                                                                                                                                                                                                                                                                                                                                                                                                                                                                                                                                                                                                                                                                                                   |
| Pbx2   | NaN                            | 1110008F13Rik,2610039C10Rik,6720456B07Rik,Actn4,Ankrd13a,Arhgap9,BC037034,Cbx4,Ccdc88b,Cd151,Dpp3,Eif4e2,Frmd8,Got1,Hk1,Hspa4l,Hspd1,Klhl2,Mis12,Mlf2,Mocs1,Mrps15,Pcmt1d,Pip4k2b,Purb,Rbm6,Rbmx,Rgl2,Rnaseh2c,Rnf19b,Rnf5,Rpl3,Sema4f,Sh3gl1,Shc1,Slc27a4,Spsb3,Stard5,Stx12,Surf1,Tmem33,Tmem43,Trim41,Ywhag,                                                                                                                                                                                                                                                                                                                                                                                                                                                                                                                                                                                                                                                                                                                                                                                                                                                                                                                                                                                                                                                                                                                                                                                                                                                                                                                                                                                                                                                                                                                                                                                                                                                    |
| Phb2   | NaN                            | 0610007C21Rik,0610012G03Rik,1110008F13Rik,1110032A13Rik,1110037F02Rik,1500012F01Rik,1810058I24Rik,2410016O06Rik,2510006D16Rik,2610024G14Rik,2810428I15Rik,2900092E17Rik,4933421E11Rik,5730437N04Rik,6330442E10Rik,6720456B07Rik,9130011J15Rik,AI413582,ATP6,Acads,Acad1,Aco2,Acox1,Adpgk,Akr1b3,Alg5,Anapc13,Arl6ip4,Arl6ip5,Arpc1b,Atp5a1,Atp5g2,Atp5o,Atp6v0a2,Aurkaip1,Axin1,B430203M17Rik,Bag1,Bloc1s1,Bloc1s3,Bysl,C730025P13Rik,Calm3,Cars2,Cbx4,Cct2,Cct5,Cct7,Cdk5rap3,Cdkn2aipnl,Chchd7,Cib1,Cir1,Cnpy2,Cope,Cops6,Cops8,Cox5a,Cox7a2,Cpsf3,Cpsf4,Crlf2,Cstf1,Ctsc,Dap3,Dclre1b,Dctn2,Dhps,Dhx58,Dpagt1,Dpp3,Dtx2,Dusp7,Dynlrb1,Ebp,Echs1,Edem3,Eef1b2,Ei24,Eif3b,Eif3f,Eif3g,Eif3h,Eif3i,Eif3k,Eif4b,Eif5a,Eif6,Elf2,Emg1,Eral1,Etfb,Fam100a,Fam125a,Frmd8,G530012D18Rik,Gba2,Glb1,Glo1,Glrx2,Gltg,Gm10209,Gm10459,Gm10785,Gm11681,Gm11741,Gm12000,Gm13819,Gm1943,Gm2173,Gm5921,Gm6274,Gm6394,Gm6540,Gm8624,Gns,Gpi1,Grc10,Grn,Guk1,H2-Ke6,H2afv,Hax1,Hes6,Hn1,Hpvc-pps,Hsd17b10,Htra2,Ier2,Irf35,Imp3,Jtb,Khsrp,Kptn,LOC100047557,Ldha,Lemd2,Lsm8,Lypla2,M6pr,Mapkapk2,Mars,Mdm4,Mea1,Mfsd1,Mgat2,Mlf2,Mrp63,Mrpl14,Mrpl23,Mrpl36,Mrpl43,Mta2,Mtch1,Mul1,Mus81,Ndufa10,Ndufa4,Ndufa8,Ndufaf3,Ndufb5,Ndufb9,Ndufs2,Ndufv1,Nfkbid,Nfu1,Nme3,Nop2,Nt5c,Nudt3,Oaz1,Ostc,Park7,Pctp,Pex11b,Pfdn5,Pgk1,Pgp,Pigm,Plekhj1,Polr2c,Polr2g,Ppm1g,Ppm1m,Ppp1ca,Ppp1r8,Ppp2r5b,Prdx3,Prkag1,Psmb10,Psmb4,Psmb9,Psmid5,Pttg1ip,Pwp1,Qars,Rnaset2a,Romo1,Rpl15,Rpl19,Rpl24,Rpl3,Rpl36,Rpl36a,Rpl36al,Rpl5,Rpl6,Rpl7,Rpl7a,Rps13,Rps14,Rps15a,Rps18,Rps2,Rps23,Rps27l,Rps4x,Rps7,Rsl24d1,Rwdd1,Samm50,Serf2,Sh3gl1,Shc1,Slc12a6,Slc25a39,Slc35a4,Slc38a10,Smc2,Smg5,Snord82,Snrpb,Snrpd2,Snx20,Sod2,Spsb3,Ssr2,Supt3h,Surf1,Surf4,Sys1,Taf10,Taz,Tbcb,Tex2,Tex261,Thoc5,Thoc6,Tm2d2,Tm9sf1,Tmem111,Tmem18,Tmem70,Tmem82,Tmem85,Tpra1,Trappc5,Trappc6b,Trdn,Triap1,Trim27,Trim35,Tubb2c,Txn2,Txndc11,Txndc17,Tyk2,Uqcrb,Uqcrh,Use1,Vps25,Xbp1,Yipf5,Ywhag,Zdhhc4,Zdhhc7, |
| Phf21a | NaN                            | Atg7,B430306N03Rik,Ddx3x,Dnajb1,Dynll1,Fbxl22,Gmcl1,Grik5,Hdac4,Hist1h4b,Hist1h4m,LOC100134980,Lass6,Mex3b,Mmgt2,Nanos1,Setd7,Vps37c,Zcchc9,Znrf1,                                                                                                                                                                                                                                                                                                                                                                                                                                                                                                                                                                                                                                                                                                                                                                                                                                                                                                                                                                                                                                                                                                                                                                                                                                                                                                                                                                                                                                                                                                                                                                                                                                                                                                                                                                                                                 |
| Pias3  | NaN                            | 2310035C23Rik,5730427N09Rik,6430526N21Rik,Abca7,Acap3,Apbb3,Arhgef11,Arrdc1,Atf7,B4galt3,BC059842,Clec16a,Cradd,Ern1,Ggt5,Gm3338,Gm6540,Gm6651,Gpatch8,Hspa1a,Icam2,Ndst2,P2rx4,Polr3c,Ppox,Prr8,Rpl36a,Rpl6,Rps6kb2,Setd1b,Sh2b1,Slco3a1,Tinf2,Zmiz1,                                                                                                                                                                                                                                                                                                                                                                                                                                                                                                                                                                                                                                                                                                                                                                                                                                                                                                                                                                                                                                                                                                                                                                                                                                                                                                                                                                                                                                                                                                                                                                                                                                                                                                             |
| Pknox1 | NaN                            | Calcrl,Heg1,Tbx6,                                                                                                                                                                                                                                                                                                                                                                                                                                                                                                                                                                                                                                                                                                                                                                                                                                                                                                                                                                                                                                                                                                                                                                                                                                                                                                                                                                                                                                                                                                                                                                                                                                                                                                                                                                                                                                                                                                                                                  |
| Pml    | NaN                            | 3110057O12Rik,BC048403,Leprot,Mfsd8,Mina,Nup210,Pign,Rnf14,Trak1,                                                                                                                                                                                                                                                                                                                                                                                                                                                                                                                                                                                                                                                                                                                                                                                                                                                                                                                                                                                                                                                                                                                                                                                                                                                                                                                                                                                                                                                                                                                                                                                                                                                                                                                                                                                                                                                                                                  |

| TF     | Enriched for Ontogenet targets | Targets                                                                                                                                                                                                                                                                                                                                                                                                                                                                                                                                                              |
|--------|--------------------------------|----------------------------------------------------------------------------------------------------------------------------------------------------------------------------------------------------------------------------------------------------------------------------------------------------------------------------------------------------------------------------------------------------------------------------------------------------------------------------------------------------------------------------------------------------------------------|
| Pnn    | fine_module_316                | 2610002M06Rik,4930453N24Rik,ATP6,AY036118,Agtppb1,Camsap1l1,Cenpj,Cope,Cpne3,D19ErtD737e,FrmD8,Ftl1,Fubp1,Gbe1,Glud1,Gm10785,Gm5805,Gm7367,Got2,Hist1h2bb,Iqgap2,Kif5b,Lpgat1,Luc7l,Med24,Mettl3,Mkln1,Ndufa7,Pank2,Pih1d1,Pnrc2,Polb,Prpsap2,Ptpn2,Ranbp6,Riok2,Rprl1,Rprl2,Sec63,Sept2,Serp1,Sfpq,Sfrs7,Slc25a32,Slc30a9,Taf1,Tial1,Tmed4,Tmem77,Tmem82,Tmf1,Trim30,Ubxn2b,Usp16,Wdr5b,Zbed4,Zfp180,Zfp84,                                                                                                                                                         |
| Pou2f1 | NaN                            | 2810001A02Rik,Asb7,Atp6v1g1,Cfp,Cwf19l2,Dhx15,Dvl3,Fam125b,Fam76b,Gm9264,Hspa5,Ier5,Klhl20,Lclat1,Mkl2,Myst4,Phka2,Ptpn9,Rnf187,Sap130,Slc25a30,SoCs3,Unkl,Zfp169,Zfp408,Zfp609,                                                                                                                                                                                                                                                                                                                                                                                     |
| Prdm9  | NaN                            | 3830406C13Rik,Acot2,Baiap2,Clec2d,Cul2,Mbtps2,Ndufs5,Pja2,Pts,Rabif,Rad51l3,Rnf170,Rtn4ip1,Rybp,Taf12,Tmem175,Tmem19,Wdr41,Zc3h6,                                                                                                                                                                                                                                                                                                                                                                                                                                    |
| Pttg1  | NaN                            | 6530401N04Rik,Ap1s1,Eif5,                                                                                                                                                                                                                                                                                                                                                                                                                                                                                                                                            |
| Purb   | NaN                            | 1600012H06Rik,2410129H14Rik,2810002D19Rik,2900097C17Rik,3110003A17Rik,5730508B09Rik,Abcc4,Alkbh5,Ankle2,Anp32a,Armc1,Atxn1l,BC013529,BC050254,BC056474,Bnip3,C78339,Cggbp1,Chchd2,Chmp1b,Chordc1,Cnot8,Coq10b,CrelD2,Cugbp1,D1ErtD622e,Dld,Dnmt3a,ENSMUSG00000074747,Fmnl3,Gfpt1,Gm12058,Gm16372,Gm9713,Gmfb,Gnrh1,Hexim1,Hnrnpa0,Hnrpll,Ifi27l2a,Insig2,Josd1,Lig4,Mmgt1,Mrs2,Mta2,Nanos1,Nipa2,Nt5c3,Nt5dc3,Ormdl1,Pfdn2,Prf1,Prkar1a,Ptp4a2,Qk,Rell1,Ripk2,Rwdd4a,Setd3,Slain2,Slc25a20,Smc3,Smurf2,Snx18,Strm,Tmed1,Tmem123,Tmem19,Tmod3,Tra2a,Twsg1,Ubl3,Uspl1, |
| Rara   | NaN                            | Acpl2,Atg2a,Carm1,Ccdc97,Crks,Cyth1,Fam100a,Foxj2,Fuz,Gnpda2,Gpr146,Hdac5,Hrh2,Hsp90aa1,Ifih1,Kdm6b,Lrch4,Nbeal2,Ncln,Ndufa4,Ntng2,Osgin1,Pddc1,Pdk2,PsmD6,Rtp4,Setd1b,Sipa1l2,Tbca,Tle3,Tmco6,Trub2,Zfp654,                                                                                                                                                                                                                                                                                                                                                         |
| Rarg   | NaN                            | Irak2,Ptms,                                                                                                                                                                                                                                                                                                                                                                                                                                                                                                                                                          |
| Rbpj   | NaN                            | 1110057K04Rik,4930420K17Rik,AI316807,Arsk,Ccdc111,Dtx2,Exoc1,Gm10548,Haus2,Hspa1a,Lclat1,Luc7l2,Park7,Phyh,Rb1cc1,Scrn3,Setd3,Slc25a16,St6galnac2,Tmed1,Trdmt1,Vgll4,Zdhhc3,                                                                                                                                                                                                                                                                                                                                                                                         |
| Rela   | NaN                            | 0610010K14Rik,1810006K21Rik,2510002D24Rik,4932438A13Rik,Abtb2,Afmid,Alkbh4,Arf3,Atp5a1,Atp6v0e,BC021381,Bak1,Bcl3,Bloc1s2,Capns1,Cdk2ap1,Cic,Cmtm7,Creg1,Cstf1,Ctr9,Diablo,Dock10,Dym,Ebp,Eif5a,Frat1,Gm6181,Gvin1,Hexim2,I110rb,Klhl6,Lrp10,Lsm10,Ly96,Mknk2,Mocs1,Mrpl4,Mrps21,Oas1c,Phip,Plod1,Pnpla2,Pspc1,Rgs3,Rras,Rusc1,Sap130,Scaper,Slc29a3,Smpd1,Spata2,Spred2,Tada3l,Tgfb1,Tmc6,Tmem184b,Trak1,Ulk1,Ypel1,                                                                                                                                                |
| Rere   | NaN                            | 4732418C07Rik,Anp32a,Atn1,Cnot4,Dennd3,Exoc6b,Fam168a,Fus,Gm10397,Gm6548,Gng2,Irs2,Orai2,Parp12,Scai,Slc25a45,Wdr51b,Zmym5,                                                                                                                                                                                                                                                                                                                                                                                                                                          |
| Rest   | NaN                            | 1110012L19Rik,2410042D21Rik,4833420G17Rik,Ada,Adam17,Ahsa1,Aktip,Angel2,Ankle2,Aprt,Atg5,Atp6ap2,BC050254,Cdc42se2,Ern1,Fam134b,Fundc1,Gm5921,Ifnar1,Kdm5b,Map2k1,Mbip,Nlk,Oxsm,Pdlim5,Pip4k2c,Pou5f2,Pppde1,Psbm10,Rnf115,Rps2,Slc17a9,Slc30a1,Smn1,Strap,Tgfb1,Tmem41b,Vps33a,Wbp1,Zfp609,Zfp715,Zfp868,Zfyve16,                                                                                                                                                                                                                                                   |
| Rfx3   | NaN                            | Atf2,Blvrb,Fas,Gm16489,Gtdc1,Hist1h2aa,Hist1h2af,Hist1h2ao,Hist1h4i,Nsun4,Rfx7,                                                                                                                                                                                                                                                                                                                                                                                                                                                                                      |
| Rfx5   | NaN                            | 5730419I09Rik,Ccdc84,Efcab4b,Efr3a,Exoc5,Hsd17b7,Insig2,Pcgf1,Pold3,Rbm22,Setd3,Snx32,Sumf1,Tinf2,Tmem184b,Vipr1,                                                                                                                                                                                                                                                                                                                                                                                                                                                    |
| Rfx7   | NaN                            | 2810002D19Rik,5033414D02Rik,Arl4c,B230380D07Rik,Bnip3l,Capn7,Cpped1,Cyb5r3,Dpy19l3,Fam175b,Fchsd2,Lcorl,Olf1419,Pigx,Polr2f,                                                                                                                                                                                                                                                                                                                                                                                                                                         |
| Runx1  | NaN                            | 1110012D08Rik,4932441K18Rik,Acrbp,BC037112,Bat2,Clec16a,Cpsf6,Cspp1,Gga3,Gltscr1,Gramd1a,Hectd1,Mlxip,Rps3,Slc46a3,Zfp771,                                                                                                                                                                                                                                                                                                                                                                                                                                           |
| Runx3  | NaN                            | Dap,Ddx41,Nat6,Rbm3,Smc4,                                                                                                                                                                                                                                                                                                                                                                                                                                                                                                                                            |

| TF      | Enriched for Ontogenet targets | Targets                                                                                                                                                                                                                                                                                                                                                                                                                                                                                                                                                                                                                                                                                                                                                                                                                                                                                                                                                |
|---------|--------------------------------|--------------------------------------------------------------------------------------------------------------------------------------------------------------------------------------------------------------------------------------------------------------------------------------------------------------------------------------------------------------------------------------------------------------------------------------------------------------------------------------------------------------------------------------------------------------------------------------------------------------------------------------------------------------------------------------------------------------------------------------------------------------------------------------------------------------------------------------------------------------------------------------------------------------------------------------------------------|
| Ruvbl2  | NaN                            | 0610031J06Rik,0610037L13Rik,1700017B05Rik,2700007P21Rik,A530013C23Rik, Anapc11,Ap1s1,Apeh,Ard1a,Arhgap15,Atp6ap2,Cct8,Cdca7l,Chtf8,Copg,Eif3l,Got 1,H2-Q1,Higd2a,Hsp90ab1,Htatip2,Ict1,Irf2bp1,Metap1,Mrpl19,Mrps15,Mrps24,Mrrf, Nacc1,Nagpa,Naif1,Ndufa2,Ndufa3,Nf2,Orai3,Plod3,Polr2f,Pppde1,Prdx6,Ran,Rpl p0,Rps3,Sdhd,Sigmar1,Spint2,Sssca1,Stk16,Tada3l,Tmem179b,Tmem43,Trmt112, Trrap,Ttc9c,Ttl1,Tusc4,Txnl4a,Ubfd1,Wbscr22,Zfand2a,                                                                                                                                                                                                                                                                                                                                                                                                                                                                                                             |
| Rxra    | NaN                            | Abca2,Bicd2,Ccdc23,Fbxo31,Nop16,Rpa3,Tesk1,Tsc22d3,Zfp217,                                                                                                                                                                                                                                                                                                                                                                                                                                                                                                                                                                                                                                                                                                                                                                                                                                                                                             |
| Sap18   | NaN                            | 0610010K06Rik,1700016K19Rik,9030617003Rik,Abl1,Cluap1,Dstn,Fam46a,Fuca2 ,Gpr177,Rcor3,Rfx5,Slc16a6,Slc31a1,Smurf1,Tesk2,Tmem63a,Txndc16,                                                                                                                                                                                                                                                                                                                                                                                                                                                                                                                                                                                                                                                                                                                                                                                                               |
| Scmh1   | NaN                            | Acat1,H2-Q8,Isoc1,Mmadhc,Ofd1,Orc5l,Ppap2b,Sdhd,Spata1,Tmco6,Tmem141,Ylpm1,                                                                                                                                                                                                                                                                                                                                                                                                                                                                                                                                                                                                                                                                                                                                                                                                                                                                            |
| Setd8   | NaN                            | 4732418C07Rik,5730403M16Rik,8430410A17Rik,A530054K11Rik,Abca1,Ccdc97, Cct2,Cstf1,Fam172a,Gm10673,Gtf3c6,Hspa8,Idh1,Inpp1l,Kbtbd7,Mlec,Ppm1d,Pr ei4,Ptplb,Rwdd1,Sf3a1,Ssbp2,Thoc5,Tnfaip3,Tnks1bp1,Trim8,Tubgcp4,Zfp131,                                                                                                                                                                                                                                                                                                                                                                                                                                                                                                                                                                                                                                                                                                                                |
| Smad3   | NaN                            | 5330426P16Rik,Aacs,Anks3,Cables2,Cdyl2,Chst15,D2hgdh,Git1,Grap,Hdac6,Lrrc6 1,Orai2,Phf15,Pip5k1c,Pisd-                                                                                                                                                                                                                                                                                                                                                                                                                                                                                                                                                                                                                                                                                                                                                                                                                                                 |
| Smad5   | NaN                            | ps1,Rab11fip1,Rarg,Rbm15b,Sept2,Stk40,Susd3,Tgfr2,Vps37b,Zfp217,                                                                                                                                                                                                                                                                                                                                                                                                                                                                                                                                                                                                                                                                                                                                                                                                                                                                                       |
| Smad7   | NaN                            | Adrb2,Irf7,Pnpla8,Stk39,                                                                                                                                                                                                                                                                                                                                                                                                                                                                                                                                                                                                                                                                                                                                                                                                                                                                                                                               |
| Smad7   | NaN                            | AI987944,Aim1,Ash1l,Axin1,Ccnd2,Dexi,Dvl3,Mbp,Plxnd1,Sart1,Snapp3,Strap,Sypl ,Trim30,Unc84a,Zfp36l2,                                                                                                                                                                                                                                                                                                                                                                                                                                                                                                                                                                                                                                                                                                                                                                                                                                                   |
| Smarca2 | NaN                            | Afmid,Aldh4a1,B430319F04Rik,B4galnt1,Bcdin3d,Clic1,Ddx26b,Gm14251,Gm270 1,Gm6712,Gm9197,Hexim2,Hnrpll,Hps3,Igf1r,Iqsec1,Kcnh3,Klhdc2,Mfsd6,Oas1c, Rmi1,Rshl2a,Sbds,Slc43a3,Sumo3,Trps1,U2af1l4,Uprt,                                                                                                                                                                                                                                                                                                                                                                                                                                                                                                                                                                                                                                                                                                                                                   |
| Smarca5 | NaN                            | Abcb7,Acsl4,Arhgef1,Atl3,Cab39l,Cbx3,Dbf4,Dnajc1,Dnajc3,Gmps,Hccs,Hif1a,Hisp pd1,Idi1,Mapre1,Mbd6,Me2,Mtdh,Mtf2,Nmd3,Nr1h2,Nsdhl,Orc3l,Pbrm1,Plaa,Re v3l,Smarce1,Spnb2,Uggt1,Uxs1,Xrcc4,                                                                                                                                                                                                                                                                                                                                                                                                                                                                                                                                                                                                                                                                                                                                                               |
| Smarcb1 | NaN                            | 2210016F16Rik,2410042D21Rik,3200002M19Rik,5430437P03Rik,Agpat2,Alg1,Ap oa1bp,Apool,Atp2a3,Atp5h,Baiap2,Btrc,Calr,Cbara1,Cd81,Cdc25a,Cdc37,Cdca7,C dk2ap1,Cdk4,Cenpt,Centb1,Crel2,Cs,Ctnnbl1,Ctsb,Dcps,Ddx19a,Dguok,Dis3l,Dp p9,E130309D02Rik,Ercc2,Ergic3,Gm11270,Gm3365,Gsn,Haus4,Htt,Inpp5b,Ipo9,Ir f3,Lpcat1,Mbtps2,Med11,Mlec,Mlst8,Mpi,Mpst,Mta1,Mtor,Nktr,Nmi,Nomo1,No p10,Npm3,Nucb1,Nup88,Oma1,Parp16,Pdia4,Pgm2,Pja2,Pmf1,Pnp2,Prpc,Prkcsh, Psm2,Psmc4,Psm1d,Psm2,Ptp4a3,Pxmp4,Rad23b,Rai12,Rbms2,Rcn1,Rnf121,R pn1,Ruvbl2,Rwdd4a,Sae1,Scnm1,Sf3a1,Srp68,Ubiad1,Uck1,Zfp157,                                                                                                                                                                                                                                                                                                                                                                  |
| Smarcd1 | NaN                            | 1700012B15Rik,1810013D10Rik,2010007H12Rik,2310022A10Rik,2510003E04Rik, 2610002J02Rik,2610002M06Rik,4933437N03Rik,5730403M16Rik,5730427N09Ri k,8430410A17Rik,A730011L01Rik,AI606181,Acaa2,Adrb2,Akr1a4,Ampd2,Ap2m1, Ap4m1,Aph1a,Arfgap2,Arhgef12,Atmin,Atp1a1,BC004004,BC029214,BC031181,B cl2l13,Bcs1l,Btd,Casp7,Cbx8,Ccdc53,Ccdc56,Cd151,Cetn2,Chpf2,Comt1,Cstb,Ctns, Ddx41,Dhrs1,Dnlz,Dpy19l3,Eif4e2,Esd,Extl3,Fam54b,Fam96a,Gba,Gbas,Gemin7,G lul,Gnpda2,Gstk1,Gstm4,Gtf3c6,Gyg,Hk1,Hyou1,Id2,Idh3g,Klf10,Lcmt2,Lipa,Lrrc1 4,Lrwd1,Mcrcs1,Med6,Mrpl17,Mrpl45,Mrpl51,Mtif3,Mtmr9,Naglu,Ncdn,Ndufc2,N me6,Npc1,Pank2,Pddc1,Pex13,Pi4k2a,Pigt,Pink1,Pip4k2b,Pofut2,Poldip2,Ppig,Pp me1,Prkaca,Psm5,Psm6,Psmc3,Psm2,Ptplb,Rnf19b,Rnf5,Scly,Slc25a16,Slc25a 45,Slc37a4,Slc4a1,Snx15,Spry3,Sra1,Srd5a3,Stx6,Tatdn1,Tbcel,Tmem126a,Tme m175,Tmem185b,Tnks,Tor3a,Trappc4,Tsc2,Ube2l3,Usf1,Usp30,Usp39,Vdac1,Vda c3,Vwa5a,Wars,Wbp1,Wdr5b,Wdr61,Zbtb6,l7Rn6, |
| Smarce1 | NaN                            | Aplp2,Cox7a2,Dhx57,Hibadh,Kif13b,Pcnp,Refbp2,Slc43a3,Sptlc2,Stx2,Tulp4,                                                                                                                                                                                                                                                                                                                                                                                                                                                                                                                                                                                                                                                                                                                                                                                                                                                                                |
| Sp110   | NaN                            | C130026I21Rik,G530012D18Rik,II18bp,Kptn,Sp140,                                                                                                                                                                                                                                                                                                                                                                                                                                                                                                                                                                                                                                                                                                                                                                                                                                                                                                         |

| TF     | Enriched for Ontogenet targets | Targets                                                                                                                                                                                                                                                                                                                                                                                                                                                                                                                                                                                                                                                             |
|--------|--------------------------------|---------------------------------------------------------------------------------------------------------------------------------------------------------------------------------------------------------------------------------------------------------------------------------------------------------------------------------------------------------------------------------------------------------------------------------------------------------------------------------------------------------------------------------------------------------------------------------------------------------------------------------------------------------------------|
| Sp140  | NaN                            | 2010007H12Rik,A530032D15Rik,Arhgef12,Asb3,Csprs,Fgfr1op2,Gm5617,Gm7609,Gm8613,Pdcl3,Sp110,                                                                                                                                                                                                                                                                                                                                                                                                                                                                                                                                                                          |
| Sp4    | NaN                            | AA987161,Arl15,Crebl2,Dpagt1,EG665955,Fam103a1,Fus,Hibch,Pja2,Rbm7,Rbpj,Tiparp,Tnfaip3,Zcchc11,Zfp39,Zfp748,                                                                                                                                                                                                                                                                                                                                                                                                                                                                                                                                                        |
| Srebf2 | fine_module_312                | Acaca,Agfg2,Arhgap1,Cirbp,Clcn6,Dhcr24,Fdft1,Fdps,Fusip1,H6pd,Hmgcr,Hmgcs1,Huwe1,ldh1,ldi1,Insig1,Ldlr,Ndst1,Nkiras2,Nsdhl,Nubp1,Pcyox1,Pcyt2,Prcc1,Rusc1,Sc4mol,Sc5d,Scarb1,Sgsh,Slc25a1,Slc35c1,Sqle,Stard4,                                                                                                                                                                                                                                                                                                                                                                                                                                                      |
| Stat1  | NaN                            | Arsa,Aurkaip1,Cd274,Exoc4,Nlrc5,Pcgf5,Psemb9,Rev3l,Samhd1,                                                                                                                                                                                                                                                                                                                                                                                                                                                                                                                                                                                                          |
| Stat2  | NaN                            | 1600014C10Rik,A430107D22Rik,Anapc11,B4galt7,BC056474,Bat2,Bnip3l,Camk2b,Ccdc91,Hdac7,Ints1,Jak3,Nfkbie,Pols,Psme1,Sec61b,Sema4a,Trafd1,Vars,Zfp408,                                                                                                                                                                                                                                                                                                                                                                                                                                                                                                                 |
| Stat4  | NaN                            | Il4ra,                                                                                                                                                                                                                                                                                                                                                                                                                                                                                                                                                                                                                                                              |
| Suz12  | NaN                            | AI987944,Arf6,B230219D22Rik,Birc6,Ccdc41,Ccnt1,Cenpb,Cops5,Cul2,Edem1,Emid1,Mex3c,Mphosph10,Tpr,Ube2q2,                                                                                                                                                                                                                                                                                                                                                                                                                                                                                                                                                             |
| Taf1   | NaN                            | 2310001H12Rik,2510003E04Rik,3110043O21Rik,4632419I22Rik,9430008C03Rik,AI314976,Acp2,Acs1,Alg10b,Ap3m1,Ap4e1,Armc1,Atp1a3,Atp6v1c1,BC031353,Brd8,Brwd2,C330007P06Rik,Cbx5,Chka,Clasp2,Clpx,Cstf3,Ctdspl2,Ddx19a,Ddx3y,Ddx50,Dnajc10,Dnm1l,Dpy19l4,Eif2a,Fam172a,Fkbp5,Fmr1,Fusip1,Gabpa,Gopc,Gp hn,Hace1,Herc5,Hspa4l,Htt,Ip6k2,Ipo9,Kctd9,Kif16b,Map4k5,Metap1,Mpp7,Mtap7d1,Nfx1,Nsf,Nvl,Pcgf5,Pebp1,Pias2,Pign,Pnn,Polr3f,Ppm1f,Ppp2r5c,Ppwd1,Rab18,Rad18,Rbmx,Rev1,Rmi1,Sc5d,Sec61b,Senp5,Sh3bgrl,Slc25a24,Slc36a4,Smc5,Srp54b,Srp54c,Ssbp1,Stag1,Suz12,Terf1,Tex10,Tfb2m,Thrap3,Tm2d1,Tsn,Txndc11,Ubfd1,Unc84a,Usp24,Wtap,Xpo1,Zcchc4,Zfp410,Zfp512,Zranb2,Zw10, |
| Taf1a  | NaN                            | 0610037L13Rik,2310004I24Rik,4833420G17Rik,9230112E08Rik,Aak1,Abcc5,Acad11,Alg5,Ccdc109a,Dcaf13,Efcab4b,Exoc1,Foxo3,Gm5512,Gm6134,Gtf2f2,Ilkap,Immt,Impad1,Kdsr,Kif3c,Larp4,Med4,Mmadhc,Mppe1,Mrpl39,Mtfmt,Nadsyn1,Nde1,Ndufv1,Nfrkb,Nqo2,Nxn,Orc5l,Pldn,Polr3b,Pon2,Prpf18,Psmf1,Rmnd1,Rpl36,Sec23a,Setdb1,Slc3a2,Tapt1,Tk2,Tmem68,Tomm34,Ttc9c,Ttll4,Ubr2,Yipf1,                                                                                                                                                                                                                                                                                                   |
| Tbx6   | NaN                            | 4930522L14Rik,4932441K18Rik,9230112E08Rik,Abca2,Acrbp,Ascc3,Git1,Lrch4,Nbeal2,Nfkbid,Pknox1,Sfrs3,Ssx2ip,Suv420h2,Tmem86b,Tsc2,                                                                                                                                                                                                                                                                                                                                                                                                                                                                                                                                     |
| Tcf19  | NaN                            | 1500032L24Rik,1810013D10Rik,B4galt3,Dad1,Emb,Etv6,H2afz,Jagn1,Lsm3,MarveId1,Mfsd10,Ndufs6,Nrm,Nubp1,Phb2,Pih1d1,Pkmyt1,Rcc2,Reep4,Ripk3,Rnf26,Sfxn1,Tcigr1,Yif1b,                                                                                                                                                                                                                                                                                                                                                                                                                                                                                                   |
| Tcfe2a | NaN                            | 2810001A02Rik,4831426I19Rik,4933439F18Rik,6430526N21Rik,A230046K03Rik,AA960436,Abl1,Acox1,Adcy3,Ap1s1,Ard1a,Atf6b,Atn1,Atp5g1,B4galnt1,Bat4,Btd2,Ccdc115,Chmp1a,Crat,Dcaf15,Dpp9,F630110N24Rik,Fam117a,Fmr1,Foxp4,G530012D18Rik,Git1,Gliplr1,Gltsr2,Gm15441,Hdgl,Ibtk,Lamp1,Med16,Mif4gd,Mospd3,Mpdu1,Mtf2,N4bp2l2,Nacc1,Ncdn,Ndufa11,Ndufv3,Nipbl,Nr1h2,Paqr7,Phkg2,Pigt,Pld3,Polr1d,Polr2c,Ppp2r5d,Prkaca,Ptger1,Rab37,Rpp21,Sh3bp1,Sirt6,Slc12a6,Slc24a6,Slc27a4,Snx13,Sssca1,Sys1,Tcigr1,Tmco4,Trex1,Tubb5,Was,Wdr81,Wsb2,Znf512b,                                                                                                                              |
| Tfdp1  | NaN                            | 1700054O19Rik,Aldh2,Ank,Atp6v1d,Cdc26,Cdk6,Entpd5,Gm5785,Gm6273,Hist1h1c,Hmgcs1,Metap2,Mrpl9,Nars,Ola1,Pdha1,Sdhd,Sh3bp5,Sh3glb1,Slc17a9,Slc35a3,Slc9a9,Tmem39b,                                                                                                                                                                                                                                                                                                                                                                                                                                                                                                    |
| Thra   | NaN                            | Ergic1,G6pc3,Glt25d1,Pdk2,Pnpla2,Pppdf,Prkar1a,Tmem179b,Yif1b,Zfp410,                                                                                                                                                                                                                                                                                                                                                                                                                                                                                                                                                                                               |
| Trerf1 | NaN                            | Eri1,Hiat1,Nup107,Plxnd1,                                                                                                                                                                                                                                                                                                                                                                                                                                                                                                                                                                                                                                           |
| Trim14 | NaN                            | AU042671,B4galt1,Cct6a,Fbxo42,Gmfg,Ifi27l1,Mapre1,Mrpl9,ND4L,Pitpnm1,Rab24,Rap2a,Serinc5,Sike1,Sirt6,Tomm7,Zgpat,                                                                                                                                                                                                                                                                                                                                                                                                                                                                                                                                                   |
| Trim25 | NaN                            | Apc,Bmf,Errfi1,Irf9,Krr1,Morc3,Mpp5,Tpd52l2,Zfp672,                                                                                                                                                                                                                                                                                                                                                                                                                                                                                                                                                                                                                 |

| TF      | Enriched for Ontogenet targets | Targets                                                                                                                                                                                                                                                                                                                                                                                                                                                                      |
|---------|--------------------------------|------------------------------------------------------------------------------------------------------------------------------------------------------------------------------------------------------------------------------------------------------------------------------------------------------------------------------------------------------------------------------------------------------------------------------------------------------------------------------|
| Trps1   | NaN                            | 2310001H12Rik,2310008H04Rik,4930522L14Rik,Acat1,Arhgap26,Csda,Elac1,Ly96, Twistnb,                                                                                                                                                                                                                                                                                                                                                                                           |
| Tsc22d3 | NaN                            | 2810474O19Rik,AI467606,Abhd15,Card6,Cxcr4,Dnajb1,Edem1,Exoc3,Fam46c,Fgf r1op2,Fkbp5,Haus8,Hint1,Papd5,Prdx6,Slc35e1,Timp2,                                                                                                                                                                                                                                                                                                                                                   |
| Whsc1l1 | NaN                            | 2900010M23Rik,A430078G23Rik,A430110L20Rik,AI413582,Acp5,Ada,Akap8l,Bak 1,Bckdk,Ccdc32,Chd7,Ddx60,Dirc2,Gltd8d3,Gm10091,Gm7774,Gnas,Gripap1,Heatr 5a,Hist1h2bh,Hist2h2bb,Hspbp1,Klhl6,Lrrfip1,Mcts2,Mrps33,Ndufa10,Ndufa7,N dufb4,Nt5e,Ppapdc1b,Prkab2,Psmb6,Rbm15b,Sema4b,Smgs1,Srgap2,Srp2k2,Ssr2, Tmcc1,Traf5,Vamp1,Wdr13,                                                                                                                                                 |
| Xbp1    | NaN                            | 5730494M16Rik,9130401M01Rik,AI316807,Chmp5,Creld2,Dcun1d1,Fam48a,Fam 76b,Garnl1,Gatsl3,Gnpda1,lsg20,Nubp2,Pdcl,Pdk3,Pfkl,Pgrmc1,Prpsap2,Slc31a1,S mpdl3a,Ubxn8,Znr1d,                                                                                                                                                                                                                                                                                                        |
| Zbtb38  | NaN                            | Cdc42ep4,Chst12,Dhcr24,Gm4638,Irf9,Morc3,Rnf7,Terf2ip,                                                                                                                                                                                                                                                                                                                                                                                                                       |
| Zfp217  | NaN                            | 1190005F20Rik,4933433P14Rik,Brpf3,D14Abb1e,Daglb,Erp44,Gcc2,Gm6041,Hda c5,Iltfg3,Iltgal,Itpk1,Mrpl24,Mthfr,Pacs2,Pbxip1,Pik3cd,Pim1,Rab11fip4,Rap2b,Sik1 ,Smad3,Smad7,Spast,Stim1,Tbc1d13,Thoc2,Tmem42,Tomm22,Uba2,Vgll4,Vps52, Zfp710,                                                                                                                                                                                                                                      |
| Zfp367  | NaN                            | 1500010J02Rik,1700025G04Rik,Cep78,Cryl1,Hspb6,Mrp63,Nup37,Phkb,Poldip2,S cmh1,Slc1a5,                                                                                                                                                                                                                                                                                                                                                                                        |
| Zfp3612 | NaN                            | 2310067B10Rik,AI316807,Abca7,Anks1,Csnk1e,Extl3,Gramd1b,Klf13,Map2k1,Ora i3,Pbx2,Pip5k1c,Rpl23a,Tpcn1,Zc3h7a,                                                                                                                                                                                                                                                                                                                                                                |
| Zfp410  | NaN                            | 1500031L02Rik,5730494M16Rik,A530013C23Rik,Acaca,Aqr,Atpaf1,BC049349,Ca bles2,Cdad1,Cdc16,Cdk5rap2,Chchd7,Copg,Cox11,Cyb5b,D1Ert448e,Dennd4c, Diablo,Dnajc24,Eral1,Erlin2,Fam116a,Fam123a,Foxn3,Gm6950,Gm7413,Gmps,G orasp2,Hint3,Ift20,Ill10rb,Ints10,Klc1,Krtcap3,Lactb2,Magi3,Mapk8,Myo9a,Prr7,R bbbp8,Rhot1,Rps6ka5,Sap18,Seh1,Slc10a7,Sos1,Stard3nl,Tet2,Thoc7,Tmem194,T mem39a,Tnnt3,Tubgcp3,Tubgcp4,Ube2f,Ubn2,Usp1,Wasl,Xpo7,Zadh2,Zdhhc13, Zdhhc6,Zfp672,Zhx3,Zwint, |
| Zfp422  | NaN                            | Brd8,Dnahc8,Ifngr2,Mrfap1,Rab21,Tes,                                                                                                                                                                                                                                                                                                                                                                                                                                         |
| Zfp691  | NaN                            | 1110006O24Rik,1300010F03Rik,1500041N16Rik,2810416G20Rik,Aaas,Adat2,Bscl 2,C030046E11Rik,D11Wsu47e,Dhrs11,Gga3,Gltp,Idh3g,Pgm1,Rab12,Snx32,Stam bpl1,Strada,Tusc4,Uxt,                                                                                                                                                                                                                                                                                                        |
| Zfp715  | NaN                            | 1600014C10Rik,Asb3,Atf2,BC063263,Ctns,Erich1,Fam20b,Gltd8d1,Gmip,Lass6,Plaa ,Pop4,Rest,Rpl15,Sesn3,Sfrs12ip1,Spg11,Trib3,Ubash3b,Unc50,Zfp52,Zfp87,                                                                                                                                                                                                                                                                                                                          |
| Zgpat   | NaN                            | AY036118,Adamts10,Atg16l1,C430010C01,Fam13b,Fam188a,Got2,Hps5,Ikbke,Itg b7,Lime1,Luc7l,Ncdn,Nisch,Pdcd2l,Pygo2,Shkbp1,Slc37a3,Smpd2,Srpt,Tbc1d1,Tm em39a,Zfp182,Zranb1,Zw10,rp9,                                                                                                                                                                                                                                                                                             |
| Zhx1    | NaN                            | 1110032A03Rik,2700007P21Rik,4732418C07Rik,4933407N01Rik,4933411K20Rik, 4933421E11Rik,5730601F06Rik,Asxl2,Btrc,Ccng1,Cenpq,Cep57,Cetn2,Creg1,D23 0037D09Rik,Dapp1,Dguok,Dnajc13,Elmod2,Evi2a,Gnpda2,H2-Q1,H2- Q2,Ift27l2a,Impad1,Kdm5d,Malt1,Mbip,Mbnl3,Mbtps2,Mut,Nsun3,Orc3l,Osgepl1 ,Papd4,Parp6,Pbrm1,Pou2f1,Prkx,Rnf170,Rnft1,Rnu73b,Rps18,Sec24a,Senp7,Ses n1,Sh3glb1,Shfm1,Snhg1,Snord49b,Sntb1,St3gal3,Taf1a,Zbtb26,Zfp277,Zfp398,Zf p759,                            |
| Zmynd11 | NaN                            | Fut8,Gm2382,Larp7,Mthfs,Nf1,Prkci,Smad5,Stxbp5,Vps13b,Zfp451,                                                                                                                                                                                                                                                                                                                                                                                                                |
